# Supplementary material
Source: PubMed Central journal article supplement (PMC5749341)
Supplement: gutjnl-2016-312232supp001.pdf [file gutjnl-2016-312232supp001.pdf]

**Supplementary Table S1.** Pathogenic mutation classification.

Mutations can be classified as public ( $\geq 30\%$  allele frequency) or private ( $< 30\%$  allele frequency) and each polyp is classified as harboring multiple public, single public, public and private, or only private mutations.

| Multiple Public |                    |         | Single Public |                    |         | Public + Private |                    |         | Only Private |                    |         |
|-----------------|--------------------|---------|---------------|--------------------|---------|------------------|--------------------|---------|--------------|--------------------|---------|
| Sample          | Adjusted Frequency | Gene.ID | Sample        | Adjusted Frequency | Gene.ID | Sample           | Adjusted Frequency | Gene.ID | Sample       | Adjusted Frequency | Gene.ID |
| PF270           | 100%               | FBXW7   | PF289         | 100%               | APC     | PF290            | 98%                | APC     | PF18         | 26%                | RB1     |
|                 | 100%               | TP53    | PF249         | 100%               | APC     |                  | 25%                | NRAS    |              | 8%                 | KRAS    |
| PF245           | 92%                | RB1     | PF255         | 100%               | BRAF    | PF24             | 86%                | APC     |              | 5%                 | TP53    |
|                 | 88%                | APC     | PF278         | 89%                | APC*    |                  | 12%                | KRAS    | PF276        | 11%                | FGFR3   |
| PF256           | 100%               | KRAS    |               | PF288              | 80%     | APC              | PF296              | 55%     |              | BRAF               | 10%     |
|                 | 57%                | FBXW7   | PF14          | 78%                | APC     | 13%              |                    | APC     | 10%          | APC                |         |
| PF254           | 100%               | TP53    |               | PF241              | 79%     | KRAS             | PF15               | 47%     | APC          | PF274              | 28%     |
|                 | 38%                | FBXW7   | PF273         | 76%                | APC     | 43%              |                    | APC     | PF17         | 24%                | BRAF    |
| PF250           | 100%               | APC     | PF01          | 37%                | APC     | 6%               |                    | KRAS    | PF279        | 22%                | APC     |
|                 | 34%                | KRAS    | PF04          | 67%                | APC     | PF293            | 45%                | BRAF    | PF20         | 17%                | APC     |
| PF259           | 100%               | APC     |               | PF12               | 40%     |                  | APC                | 12%     | APC          | PF06               | 9%      |
|                 | 31%                | TP53    | PF19          | 36%                | APC     |                  | 10%                | APC     |              |                    |         |
| PF08            | 59%                | EGFR    | PF21          | 38%                | APC     | 9%               | KRAS               |         |              |                    |         |
|                 | 48%                | APC     | PF22          | 37%                | APC     | PF13             | 33%                | APC     |              |                    |         |
| PF25            | 58%                | APC     |               | PF23               | 35%     |                  | APC                | 12%     | APC          |                    |         |
|                 | 55%                | APC     | PF239         | 52%                | BRAF    | 5%               | FBXW7              |         |              |                    |         |
| PF264           | 46%                | APC     |               | PF285              | 50%     | APC              |                    |         |              |                    |         |
|                 | 41%                | APC     | PF287         | 62%                | APC     |                  |                    |         |              |                    |         |
|                 |                    |         | PF295         | 56%                | BRAF    |                  |                    |         |              |                    |         |
|                 |                    |         | PF297         | 69%                | BRAF    |                  |                    |         |              |                    |         |
|                 |                    |         | PF298         | 48%                | BRAF    |                  |                    |         |              |                    |         |

**Supplementary Table S2.** Detectable mutations generated by statistical inference.

Four sets of parameters were used to generate *in silico* polyps with detectable mutations. Baseline parameters used were mutation rate distribution =  $5 \times 10^{-4}$  mutations per crypt fission event and a fitness change distribution =  $N(0, 0.2)$ . These two parameters were then modified to further investigate the finding that detectable mutations arose when the tumor was small.

| <b>Mutation Rate</b> | <b>Fitness Change Distribution</b> | <b>n*</b> | <b>Median Size</b> | <b>Mean Size</b> | <b>Standard Deviation (Size)</b> | <b>Median Fitness Change</b> | <b>Mean Fitness Change</b> | <b>Standard Deviation (Fitness Change)</b> |
|----------------------|------------------------------------|-----------|--------------------|------------------|----------------------------------|------------------------------|----------------------------|--------------------------------------------|
| $5 \times 10^{-4}$   | $N(0, 0.2)$                        | 6,429     | 18                 | 30               | 35                               | 0.174                        | 0.176                      | 0.167                                      |
| $5 \times 10^{-2}$   | $N(0, 0.2)$                        | 315,878   | 18                 | 30               | 45                               | 0.162                        | 0.164                      | 0.173                                      |
| $5 \times 10^{-4}$   | $N(2, 0.2)$                        | 47,389    | 125                | 169              | 158                              | 2.015                        | 2.015                      | 0.20                                       |
| $5 \times 10^{-2}$   | $N(2, 0.2)$                        | 837,017   | 25                 | 37               | 38                               | 2.011                        | 2.011                      | 0.20                                       |

\*Total number of mutations detectable in the slice, generated across 1,000,000 polyps

| Sample Id | MSI Analysis System 2.0 (prototype) |        |        |        |        |        |        |        |         |         |          |        | Result | Comments                                        |
|-----------|-------------------------------------|--------|--------|--------|--------|--------|--------|--------|---------|---------|----------|--------|--------|-------------------------------------------------|
|           | NR-21                               | BAT-25 | BAT-26 | Mon-27 | BAT-52 | BAT-56 | BAT-59 | BAT-60 | Penta C | Penta D | Positive | Inform |        |                                                 |
| PF01      | 0                                   | 0      | 0      | 0      | 0      | 0      | 0      | 0      | 0       | 0       | 0        | 8      | MSS    |                                                 |
| PF02      | 0                                   | 0      | 0      | 0      | 0      | 0      | 0      | 0      | 0       | 0       | 0        | 8      | MSS    |                                                 |
| PF03      | 0                                   | 0      | 0      | 0      | 0      | 0      | 0      | 0      | 0       | 0       | 0        | 8      | MSS    |                                                 |
| PF04      | 0                                   | 0      | 0      | 0      | 0      | 0      | 0      | 0      | 0       | 0       | 0        | 8      | MSS    |                                                 |
| PF05      | 0                                   | 0      | 0      | 0      | 0      | 0      | 0      | 0      | 0       | 0       | 0        | 8      | MSS    |                                                 |
| PF06      | 0                                   | 0      | 0      | 0      | 0      | 0      | 0      | 0      | 0       | 0       | 0        | 8      | MSS    |                                                 |
| PF07      | 0                                   | 0      | 0      | 0      | 0      | 0      | 0      | 0      | 0       | 0       | 0        | 8      | MSS    |                                                 |
| PF08      | 0                                   | 0      | 0      | 0      | 0      | 0      | 0      | 0      | 0       | 0       | 0        | 8      | MSS    |                                                 |
| PF09      | 0                                   | 0      | 0      | 0      | 0      | 0      | 0      | 0      | 0       | 0       | 0        | 8      | MSS    |                                                 |
| PF10      | 0                                   | 0      | 0      | 0      | 0      | 0      | 0      | 0      | 0       | 0       | 0        | 8      | MSS    |                                                 |
| PF11      | 0                                   | 0      | 0      | 0      | 0      | 0      | 0      | 0      | 0       | 0       | 0        | 8      | MSS    |                                                 |
| PF12      | 0                                   | 0      | 0      | 0      | 0      | 0      | 0      | 0      | 0       | 0       | 0        | 8      | MSS    |                                                 |
| PF13      | 0                                   | 0      | 0      | 0      | 0      | 0      | 0      | 0      | 0       | 0       | 0        | 8      | MSS    |                                                 |
| PF14      | 0                                   | 0      | 0      | 0      | 0      | 0      | 0      | 0      | 0       | 0       | 0        | 8      | MSS    |                                                 |
| PF15      | 0                                   | 0      | 0      | 0      | 0      | 0      | 0      | 0      | 0       | 0       | 0        | 8      | MSS    |                                                 |
| PF16      | 0                                   | 0      | 0      | 0      | 0      | 0      | 0      | 0      | 0       | 0       | 0        | 8      | MSS    |                                                 |
| PF17      | 0                                   | 0      | 0      | 0      | 0      | 0      | 0      | 0      | 0       | 0       | 0        | 8      | MSS    |                                                 |
| PF18      | 0                                   | 0      | 0      | 0      | 1      | 0      | 0      | 1      | 0       | 0       | 2        | 6      | MSI+   | BAT-52 and BAT-60 with 3 alleles                |
| PF19      | 0                                   | 0      | 0      | 1      | 0      | 0      | 1      | 0      | 0       | 1       | 2        | 7      | MSI+   | MONO-27 2 alleles, BAT-59 and Penta D 3 alleles |
| PF20      | 0                                   | 0      | 0      | 0      | 0      | 0      | 0      | 0      | 0       | 0       | 0        | 8      | MSS    |                                                 |
| PF21      | 0                                   | 0      | 0      | 0      | 0      | 0      | 0      | 0      | 0       | 0       | 0        | 8      | MSS    |                                                 |
| PF22      | 0                                   | 0      | 0      | 0      | 0      | 0      | 0      | 0      | 0       | 0       | 0        | 8      | MSS    |                                                 |
| PF23      | 0                                   | 0      | 0      | 0      | 0      | 0      | 0      | 0      | 0       | 0       | 0        | 8      | MSS    |                                                 |
| PF24      | 0                                   | 0      | 0      | 0      | 0      | 0      | 0      | 0      | 0       | 0       | 0        | 8      | MSS    |                                                 |
| PF25      | 0                                   | 0      | 0      | 0      | 0      | 0      | 0      | 0      | 0       | 0       | 0        | 8      | MSS    |                                                 |
| PF26      | 0                                   | 0      | 0      | 0      | 0      | 0      | 0      | 0      | 0       | 0       | 0        | 8      | MSS    |                                                 |
| PF 239    | 0                                   | 0      | 0      | 0      | 0      | 0      | 0      | 0      | 0       | 0       | 0        | 8      | MSS    |                                                 |
| PF 241    | 0                                   | 0      | 1      | 0      | 0      | 0      | 0      | 0      | nd      | nd      | 1        | 8      | EQ     | BAT-26 2 alleles                                |
| PF 245    | 0                                   | 0      | 0      | 0      | 0      | 0      | 0      | 0      | 0       | 0       | 0        | 8      | MSS    |                                                 |
| PF 249    | 0                                   | 1      | 0      | 0      | 0      | 0      | 0      | 0      | 0       | 0       | 1        | 8      | EQ     | BAT-25 2 alleles, 249 and 250 same              |
| PF 250    | 0                                   | 1      | 0      | 0      | 0      | 0      | 0      | 0      | 0       | 0       | 1        | 8      | EQ     |                                                 |
| PF 252    | 0                                   | 0      | 0      | 0      | 0      | 0      | 0      | 0      | nd      | 0       | 0        | 8      | MSS    |                                                 |
| PF 254    | 0                                   | 0      | 0      | 0      | 0      | 0      | 0      | 0      | 0       | 0       | 0        | 8      | MSS    |                                                 |
| PF 255    | 0                                   | 0      | 0      | 0      | 0      | 0      | 0      | 0      | 0       | 0       | 0        | 8      | MSS    |                                                 |
| PF 256    | 0                                   | 0      | 0      | 0      | 0      | 0      | 0      | 0      | 0       | 0       | 0        | 8      | MSS    |                                                 |
| PF 259    | 0                                   | 0      | 0      | 0      | 0      | 0      | 0      | 0      | 0       | 0       | 0        | 8      | MSS    |                                                 |
| PF 263    | nd                                  | nd     | nd     | nd     | nd     | nd     | nd     | nd     | nd      | nd      | 0        | 0      | nd     | no sample                                       |
| PF 264    | 0                                   | 0      | 0      | 0      | 0      | 0      | 0      | 0      | 0       | 0       | 0        | 8      | MSS    |                                                 |
| PF 269    | 0                                   | 0      | 0      | 0      | 0      | 0      | 0      | 0      | 0       | 0       | 0        | 8      | MSS    |                                                 |
| PF 270    | 0                                   | 0      | 0      | 0      | 0      | 0      | 0      | 0      | 1       | 0       | 0        | 8      | EQ     | 3 alleles for Penta C                           |
| PF 272    | 0                                   | 0      | 0      | 0      | 0      | 0      | 0      | 0      | 0       | 0       | 0        | 8      | MSS    |                                                 |
| PF 273    | 0                                   | 0      | 0      | 0      | 0      | 0      | 0      | 0      | 0       | 0       | 0        | 8      | MSS    |                                                 |
| PF 274    | 0                                   | 0      | 0      | 0      | 0      | 0      | 0      | 0      | 0       | 0       | 0        | 8      | MSS    |                                                 |
| PF 276    | 0                                   | 0      | 0      | 0      | 0      | 0      | 0      | 0      | 0       | 0       | 0        | 8      | MSS    |                                                 |
| PF 277    | 0                                   | 0      | 0      | 0      | 0      | 0      | 0      | 0      | 0       | 0       | 0        | 8      | MSS    |                                                 |



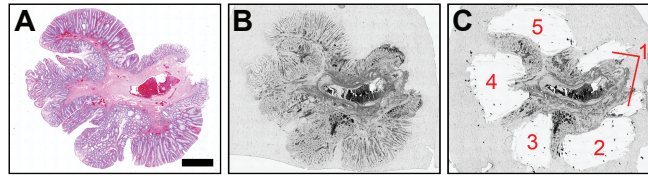

#### D. Mutations

| Sample | APC          | KRAS         |
|--------|--------------|--------------|
|        | p.E1464fs*8  | p.G12D       |
| Area 1 | Insufficient | Not detected |
| Area 2 | Present      | 0%           |
| Area 3 | Present      | >99.9%       |
| Area 4 | Present      | 13.9%        |
| Area 5 | Present      | Not detected |
| Whole  | Present      | 1.1%         |

#### E.

| Sample | Gene   | Mutation     | Cosmic ID | Bulk         | Micro-Dissected Regions |              |                  |              |              |
|--------|--------|--------------|-----------|--------------|-------------------------|--------------|------------------|--------------|--------------|
|        |        |              |           |              | Region 1                | Region 2     | Region 3         | Region 4     | Region 5     |
| PF03   | APC    | p.R876*      | 18852     | detected     | detected                | not detected | not detected     | not detected |              |
| PF03   | APC    | p.Q1429*     | 18836     | detected     | detected                | not detected | not detected     | not detected |              |
| PF 11  | CTNNB1 | p.S45F       | 5667      | not detected | not detected            | not detected | not detected     | not detected |              |
| PF12   | APC    | p.E1322*     | 18702     | detected     | detected                | detected     | detected         | detected     | detected     |
| PF14   | APC    | p.E1309fc*4  | 13113     | detected     | detected                | detected     |                  |              |              |
| PF20   | APC    | p.L1488fs*18 | 41618     | detected     | detected                | detected     | insufficient DNA |              |              |
| PF24   | APC    | p.E1464fs*8  | 18838     | detected     | insufficient DNA        | detected     | detected         | detected     | detected     |
| PF24   | KRAS   | p.G12D       | 521       | 1.1%         | not detected            | 0%           | >99.9%           | 13.9%        | not detected |
| PF25   | APC    | p.R876*      | 18852     | detected     | detected                | detected     | detected         | detected     | detected     |
| PF25   | APC    | p.R1450*     | 13127     | detected     | detected                | detected     | detected         | detected     | detected     |

Notes: PF03 was later discovered to be two separate polyps combined into 1 block and was thus not used in the final analysis. PF11 contained a CTNNB1 mutation that was likely a false positive from sequencing and was thus eliminated.

**Supplementary Figure S1.** Spatial distribution and mutation validation was performed on previously identified mutations for which commercial primers were available. (A) H&E stained section of PF24 is shown as an example. (B) Unstained section of PF24 used to guide microdissection. (C) Unstained section of PF24 following micro-dissection. (D) Quantitative PCR results for PF24 demonstrate that the public APC mutation was present in all regions for which sufficient DNA was available. This is in contrast to the private KRAS mutation which was only detected in regions 3 and 4, and at a low level in the bulk sample. (E) Quantitative PCR results for all polyps that underwent micro-dissection and mutation validation are shown. Blacked out cells indicate that those polyps did not have 5 micro-dissected regions. Only polyps which had remaining FFPE tissue were available for qPCR validation, which was a minority of cases.

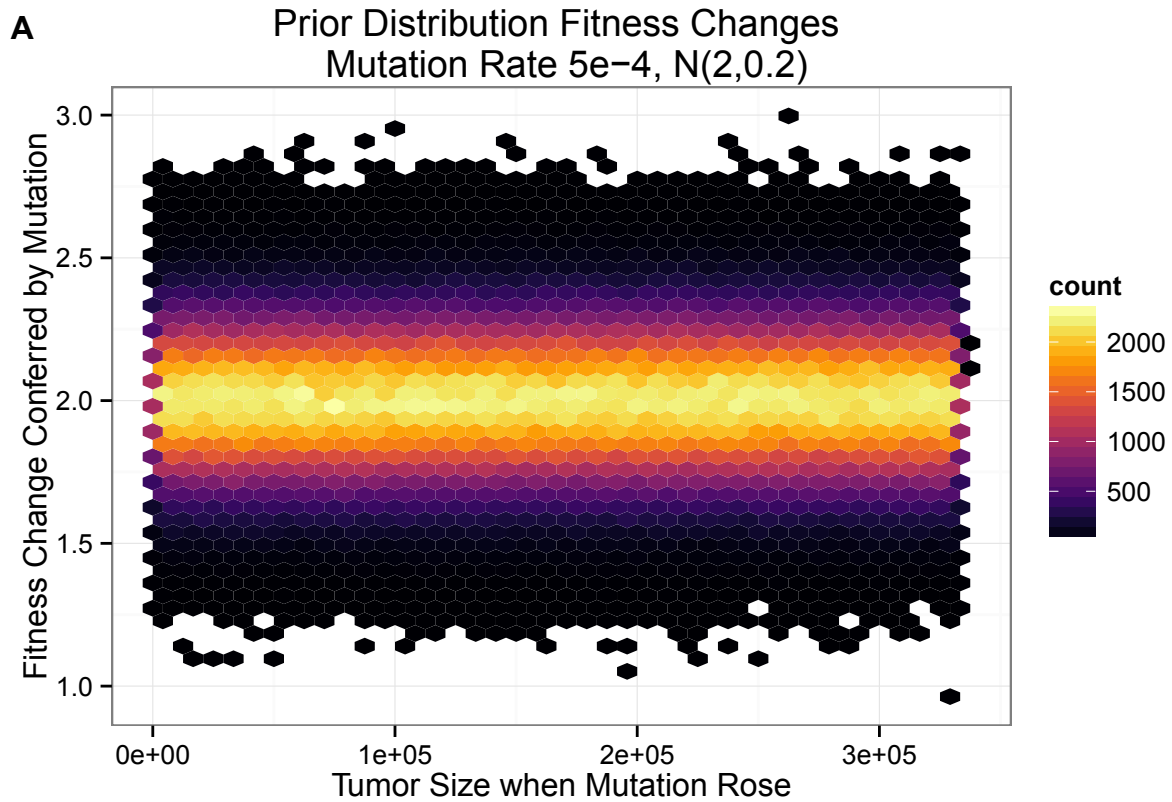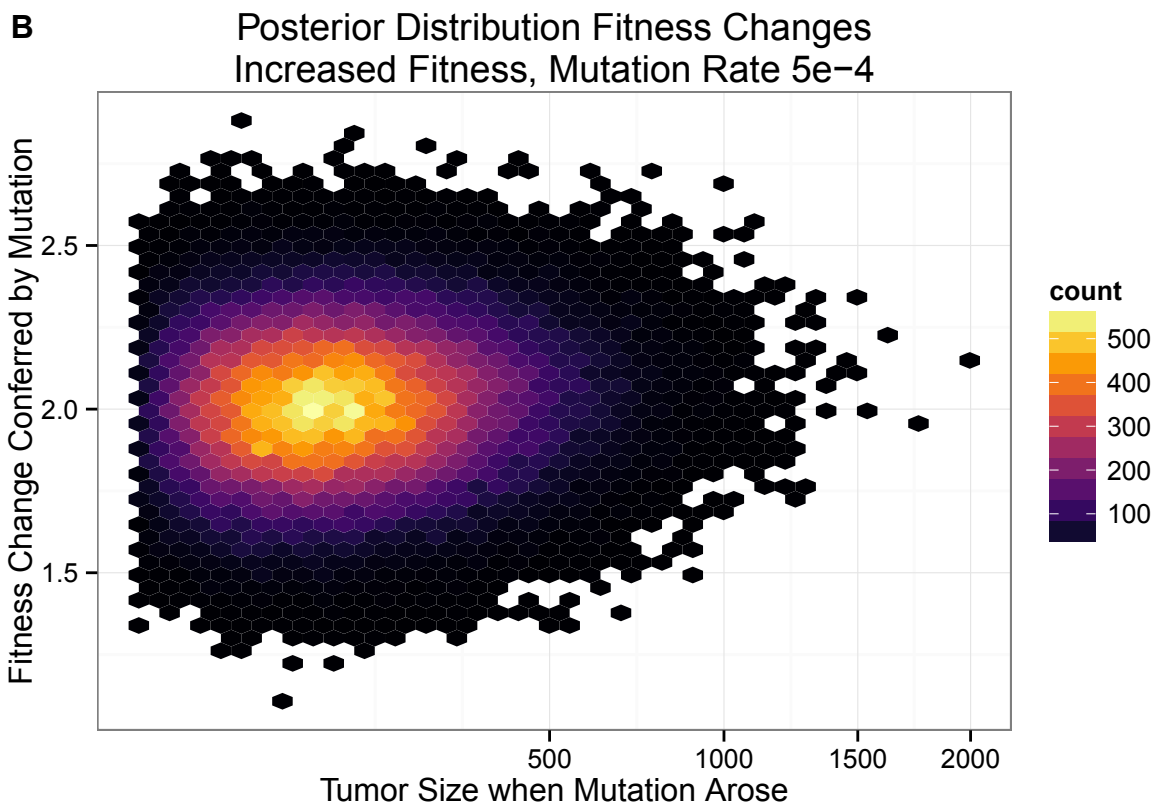

**Supplementary Figure S2.** Increased fitness change distribution still predicts that detectable mutations arise early. (A) Prior distribution of the fitness change conferred by all mutations acquired by *in silico* tumors demonstrates that mutations that affect fitness can occur at any size in the model, but center around a change of 2.0, which represents a two-fold increase in fitness. (B) Posterior distribution of the fitness change conferred by mutations that fit acceptance criteria and the size of the tumor when that mutation arose is shown.

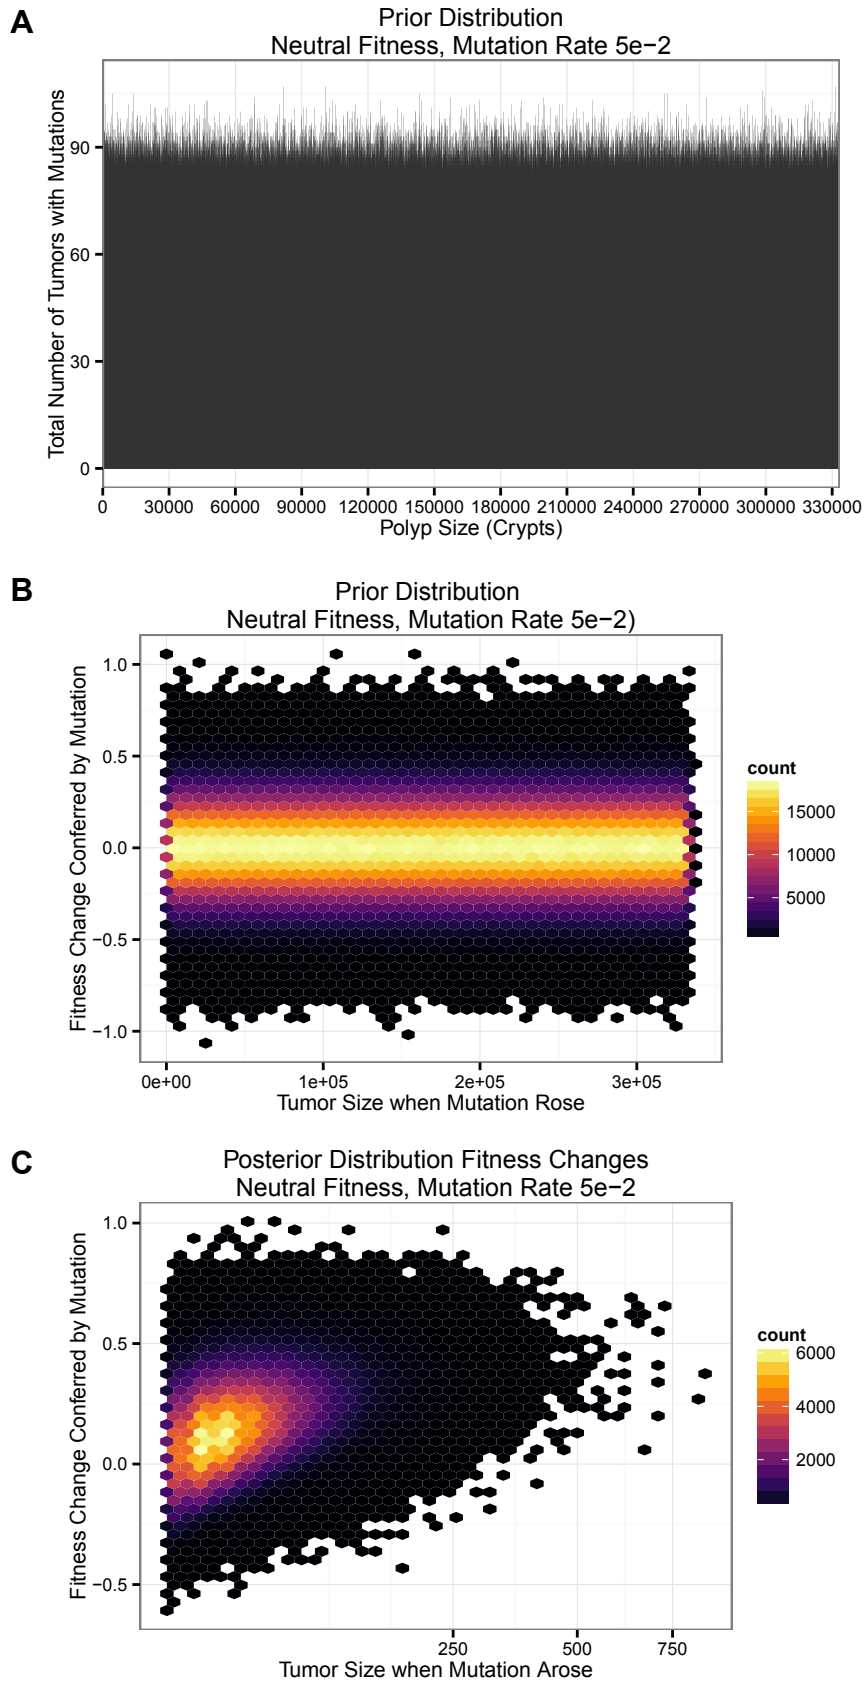

**Supplementary Figure S3.** Increased mutation rate distribution still predicts that detectable mutations arise early. **(A)** Prior distribution of all mutations acquired by in silico tumors demonstrates that mutations can occur at any size in the model. Note that this plot is generated from a random sampling of all mutations generated. **(B)** Prior distribution of the fitness change of all mutations acquired by in silico tumors demonstrates that fitness can be positive, neutral or negative. **(C)** Posterior distribution of the fitness change conferred by mutations that fit acceptance criteria and the size of the tumor when that mutation arose is shown.

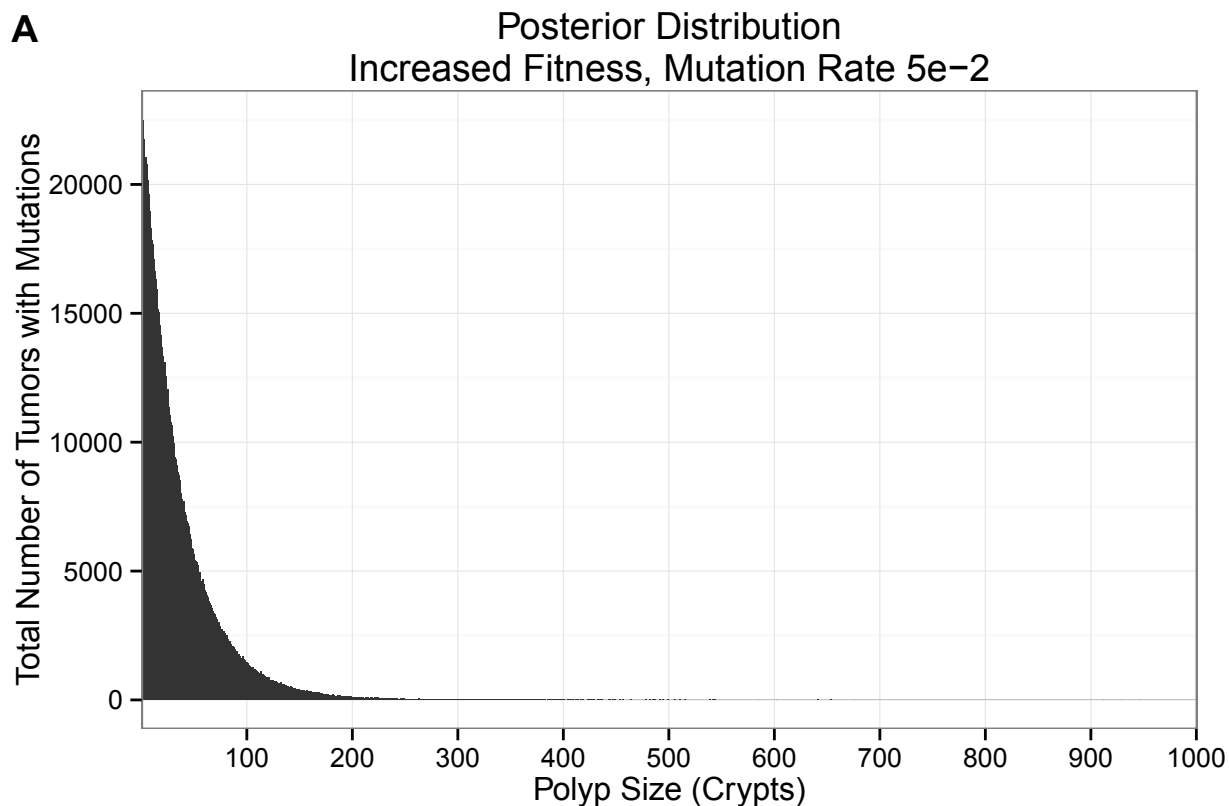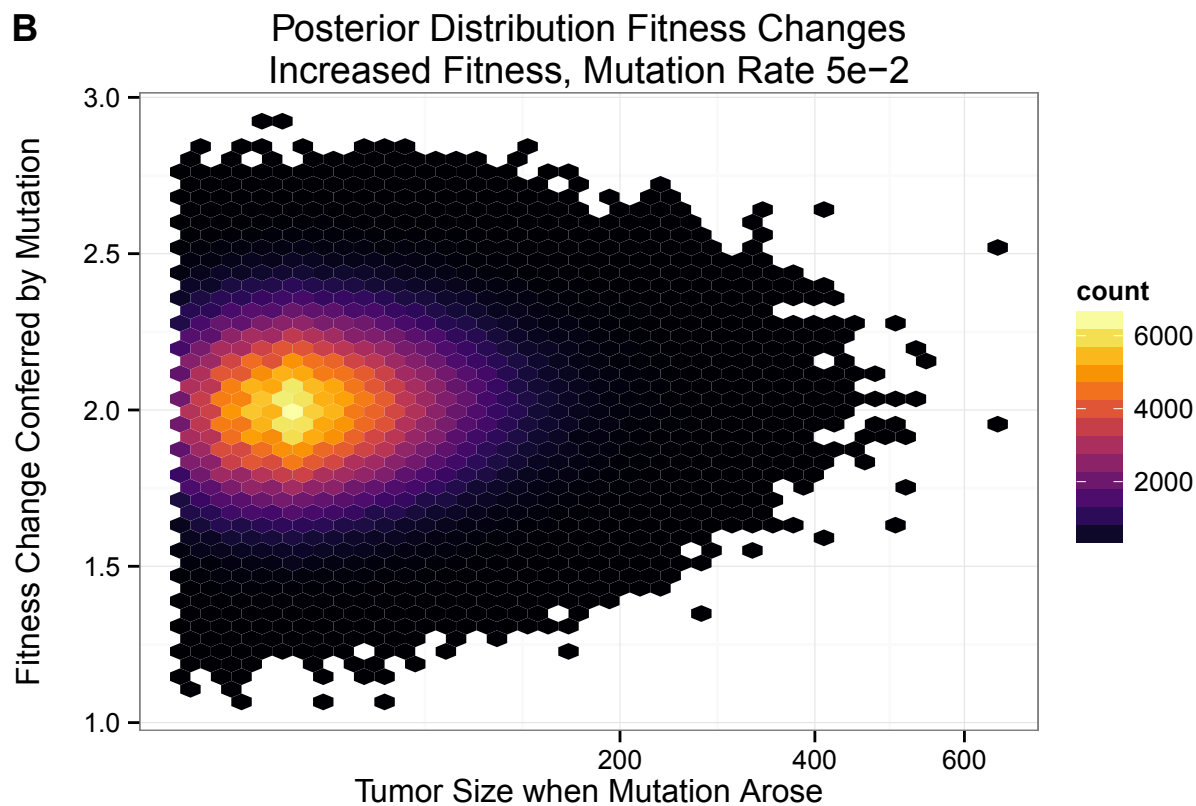

**Supplementary Figure S4.** Increased mutation rate distribution in combination with increased fitness change distribution still predict that detectable mutations arise early. **(A)** Posterior distribution of mutations that fit acceptance criteria and the size of the tumor when that mutation arose is shown. **(B)** Posterior distribution of the fitness change conferred by mutations that fit acceptance criteria and the size of the tumor when that mutation arose is shown.



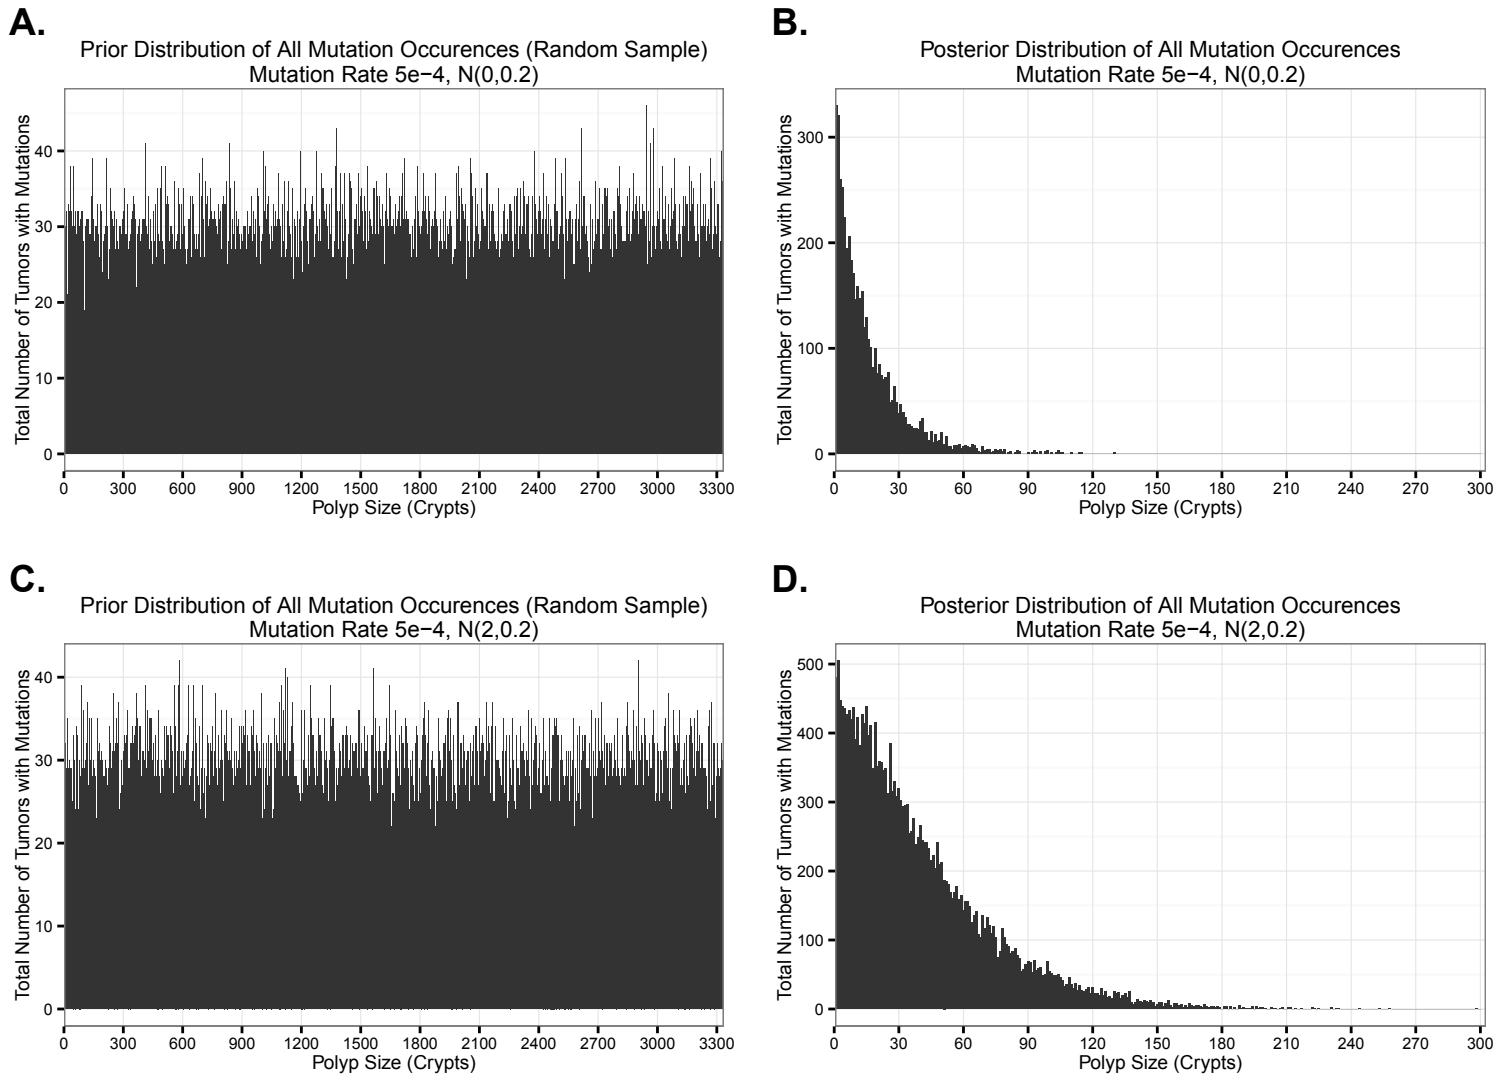

**Supplemental Figure S5:** Limiting final polyp size predicts that detectable mutations arise early. **(A)** Prior distribution of all mutations acquired by *in silico* tumors demonstrates that mutations can occur at any size in the baseline model when the final size is restricted to 3,333 crypts. **(B)** Posterior distribution of mutations that fit acceptance criteria from (A) and the size of the tumor when that mutation arose is shown, mean =  $16 \pm 16$  crypts, median = 11. **(C)** Prior distribution of all mutations acquired by *in silico* tumors demonstrates that mutations can occur at any size when fitness change is forced to be positive and when the final size is restricted to 3,333 crypts. **(D)** Posterior distribution of mutations that fit acceptance criteria from (C) and the size of the tumor when that mutation arose is shown, mean =  $40 \pm 33$  crypts, median = 31.
