# Supplementary material
Source: PubMed Central journal article supplement (PMC5749341)
Supplement: gutjnl-2016-312232supp002.pdf [file gutjnl-2016-312232supp002.pdf]

| Sample | Volume Change/year | Adjusted Allelic Frequency | Gene.ID | Codon | Variant Call          | Consequence and Notes                                                     |
|--------|--------------------|----------------------------|---------|-------|-----------------------|---------------------------------------------------------------------------|
| PF01   | 131.00%            | 37%                        | APC     | 1319  | frameshift            | Codon 1319, Frameshift causing a premature stop at codon 1320             |
| PF04   | 4.00%              | 67%                        | APC     | 1317  | Nonsense              | p.E1317*                                                                  |
| PF06   | -32%               | 9%                         | APC     | 1433  | missense              | Codon 1433, Missense (P>L) - Deleterious                                  |
| PF07   | 0%                 |                            |         |       |                       | no pathogenic identified                                                  |
| PF08   | 136.40%            | 48%                        | APC     | 1433  | frameshift            | Codon 1433, Frameshift causing a premature stop                           |
|        |                    | 59%                        | EGFR    | 596   | missense              | p.P596L - Deleterious (activating)                                        |
| PF11   | 75.20%             |                            |         |       |                       | no pathogenic identified                                                  |
| PF12   | 75%                | 40%                        | APC     | 1322  | nonsense              | p.E1322*                                                                  |
| PF13   | 59%                | 5%                         | FBXW7   | 393   | Nonsense              | Stop gained, R>stop (in the Notch pathway) p.R393*                        |
|        |                    | 12%                        | APC     | 1433  | missense              | Missense (P>L), codon 1433                                                |
|        |                    | 33%                        | APC     | 1467  | frameshift            | Truncation?, codon p.PX1467X                                              |
| PF14   | 47.70%             | 78%                        | APC     | 1309  | frameshift            | codon p.E1309fs*4                                                         |
|        |                    | 43%                        | APC     | 876   | nonsense              | Truncation, codon 876 p.R876*                                             |
| PF15   | 47.30%             | 47%                        | APC     | 1450  | nonsense              | Truncation, Codon 1450, p.R1450*                                          |
|        |                    | 6%                         | KRAS    | 146   | missense              | Missense variant (ala>val) codon 146, deleterious, p.A146V                |
| PF17   | -49.90%            | 24%                        | BRAF    | 600   | missense              | Codon 600, Missense (V>E) - Pathogenic                                    |
|        |                    | 8%                         | KRAS    | 12    | missense              | Missense variant (G/C), codon 12, predicted to be deleterious, p.G12C     |
| PF18   | -33.10%            | 26%                        | RB1     | 548   | missense              | Missense variant (K>N) codon 548, predicted to be deleterious             |
|        |                    | 5%                         | TP53    | 175   | missense              | Codon 175, Missense (R>H) - Pathogenic p.R175H                            |
| PF19   | 0.00%              | 36%                        | APC     | 1554  | frameshift            | Insertion at codon 1554, effect unknown                                   |
| PF20   | 0.00%              | 17%                        | APC     | 1488  | frameshift            | p.L1488fs*18, codon 1488                                                  |
| PF21   | 4.80%              | 38%                        | APC     | 1510  | frameshift            | Truncation, codon 1510 p.S1510X                                           |
| PF22   | 22.00%             | 37%                        | APC     | 1319  | truncating frameshift | Codon 1319, Frameshift causing a premature stop at codon 1320 p.P1319fs*2 |
| PF23   | 35.20%             | 35%                        | APC     | 1286  | nonsense              | Truncation codon p.E1286*                                                 |
| PF24   | 32%                | 86%                        | APC     | 1464  | truncating frameshift | Truncation codon 1462, p.E1464fs*8, results in stop at 1471               |
|        |                    | 12%                        | KRAS    | 12    | missense              | p.G12D missense variant, (G>D) codon 12, predicted to be deleterious      |
| PF25   | 40.30%             | 58%                        | APC     | 876   | nonsense              | Truncation, codon 876, p.R876*                                            |
|        |                    | 55%                        | APC     | 1450  | nonsense              | Truncation, codon 1450, p.R1450*                                          |
| PF26   | 42%                |                            |         |       |                       | no pathogenic identified                                                  |
| PF239  | -38.90%            | 52%                        | BRAF    | 600   | Missense              | Missense (V>E) - Pathogenic                                               |
| PF241  | 14.20%             | 79%                        | KRAS    | 12    | Missense              | Missense variant, (G>V) codon 12, predicted to be deleterious             |
|        |                    | 88%                        | APC     | 1309  | Frameshift Del        | p.E1309fs*4                                                               |
| PF245  | 66.90%             | 92%                        | RB1     | 656   | Missense              | p.R656W SIFT = deleterious, PolyPhen = benign                             |

| Sample | Volume Change/year | Adjusted Allelic Frequency | Gene.ID | Codon     | Variant Call   | Consequence and Notes                                |
|--------|--------------------|----------------------------|---------|-----------|----------------|------------------------------------------------------|
| PF249  | -28.60%            | 188%                       | APC     | 1309      | Frameshift Del | p.E1309fs*4                                          |
| PF250  | 147.40%            | 113%                       | APC     | 1379      | Insertion      | p.E1379ETX effect unknown                            |
| PF252  | -27.40%            | 34%                        | KRAS    | 13        | Missense       | p.G13D pathogenic                                    |
| PF254  | 20.80%             | 38%                        | FBXW7   | 482       | Missense       | p.T482A, deleterious by both SIFT and PolyPhen       |
|        |                    | 116%                       | TP53    | 90        | missense       | p.S?90F?                                             |
| PF255  | 17.20%             | 131%                       | BRAF    | 600       | Missense       | p.V600E                                              |
| PF256  | 95.30%             | 57%                        | FBXW7   | 385       | Missense       | p.R385C                                              |
|        |                    | 108%                       | KRAS    | 61        | Missense       | p.Q61L                                               |
| PF259  | 3%                 | 205%                       | APC     | 1309      | Frameshift Del | p.E1309fs*4                                          |
|        |                    | 31%                        | TP53    | 306       | Nonsense       | p.R306*                                              |
| 264    | -4.40%             | 46%                        | APC     | 1429      | Nonsense       | p.Q1429*                                             |
|        |                    | 41%                        | APC     | 1450      | Nonsense       | p.R1450*                                             |
| PF270  | 23.70%             | 103%                       | FBXW7   | 26/385/46 | Missense       | p.R385H                                              |
|        |                    | 193%                       | TP53    | 195       | Missense       | p.I195T                                              |
| PF273  | 42.50%             | 76%                        | APC     | 1455      | Frameshift Ins | p.N1455fs*2                                          |
| PF274  | -39.60%            | 28%                        | APC     | 1455      | Frameshift Ins | p.N1455fs*2                                          |
|        |                    | 11%                        | FGFR3   | 532/644   | Missense       | p.N532/644D                                          |
| 276    | -22.80%            | 10%                        | FBXW7   | 482       | Missense       | p.T482A, deleterious by both SIFT and PolyPhen       |
|        |                    | 10%                        | APC     | 1433      | Missense       | Missense (P>L) Deleterious                           |
| 277    | 66.20%             |                            |         |           |                | no pathogenic variants                               |
| PF278  | -49%               | 89%                        | APC     | 1363      | Deletion       | p.KS?1363? Out of frame deletion, effect unknown     |
|        |                    | 89%                        | APC     | 1455      | Frameshift Ins | p.N1455fs*2                                          |
| PF279  | -21.70%            | 22%                        | APC     | 1451      | insertion      | p.E1451A?, probably pathogenic?                      |
| PF285  | 12.30%             | 50%                        | APC     | 1291      | Nonsense       | p.Q1291*                                             |
| PF287  | 37.50%             | 62%                        | APC     | 1556      | Frameshift del | p.T1556fs*9                                          |
| PF288  | -8.40%             | 80%                        | APC     | 1096      | Nonsense       | p.Q1096*                                             |
| PF289  | 1.00%              | 150%                       | APC     | 1353      | Nonsense       | p.E1353*                                             |
| PF290  | 109.80%            | 25%                        | NRAS    | 12        | Missense       | p.G12C                                               |
|        |                    | 98%                        | APC     | 1492      | Deletion       | ATES?/A deletes a T,E,S at codons 1492, 1493, 1494 ? |
|        |                    | 10%                        | APC     | 1373      | Missense       | p.P1373L                                             |
|        |                    | 12%                        | APC     | 1558      | Missense       | p.D1558N                                             |
| PF293  | 28.30%             | 45%                        | BRAF    | 600       | Missense       | p.V600E                                              |
|        |                    | 9%                         | KRAS    |           |                | splice donor variant - predicted to have high impact |
| PF295  | -47.80%            | 56%                        | BRAF    | 600       | Missense       | p.V600E                                              |
| PF296  | -43.10%            | 13%                        | APC     | 1433      | Missense       | Missense (P>L) Deleterious                           |
| PF296  | -43.10%            | 55%                        | BRAF    | 600       | Missense       | p.V600E                                              |
| PF297  | -29.90%            | 69%                        | BRAF    | 600       | Missense       | p.V600E                                              |
| PF298  | -20.80%            | 48%                        | BRAF    | 600       | Missense       | p.V600E                                              |

Colors indicate the growth category each polyp was classified as: green = growing polyps ( $\geq 20\%$ ), orange = static polyps (20% to -20%), red = regressing polyps ( $\leq -20\%$ ).
