# Supplementary material
Source: PubMed Central journal article supplement (PMC5749341)
Supplement: gutjnl-2016-312232supp003.pdf [file gutjnl-2016-312232supp003.pdf]

| Sample | Volume Change | Pathology                        | Sample Notes                             | Tumor Cellularity Estimate | Chromosome | Position  | Reference | Variant | Allelic Frequency | Adjusted Allelic Frequency | Quality | Original Coverage  | Allele Coverage (# allele reads) | Allele Name                                         | Gene ID | Call                | Codon | Annotation                                      |
|--------|---------------|----------------------------------|------------------------------------------|----------------------------|------------|-----------|-----------|---------|-------------------|----------------------------|---------|--------------------|----------------------------------|-----------------------------------------------------|---------|---------------------|-------|-------------------------------------------------|
| PF01   | 131.00%       | Tubular Adenoma                  |                                          | 50%                        | chr2       | 212812097 | T         | C       | 53%               | 107%                       | 7560.26 | 1351               | 721                              | ---                                                 | ERBB4   | SNP                 |       | Intronic Variant (33%)                          |
|        |               |                                  |                                          | 50%                        | chr4       | 1807894   | G         | A       | 100%              | 200%                       | 15859.9 | 995                | 995                              | ---                                                 | FGFR3   | SNP                 |       | Protein coding, synonymous variant              |
|        |               |                                  |                                          | 50%                        | chr4       | 55141055  | A         | G       | 100%              | 200%                       | 28940.2 | 1813               | 1813                             | ---                                                 | PDGFRA  | SNP                 |       | Protein coding, synonymous variant              |
|        |               |                                  |                                          | 50%                        | chr4       | 55980239  | C         | T       | 37%               | 73%                        | 5257.68 | 1693               | 620                              | ---                                                 | KDR     | SNP                 |       | Intronic variant                                |
|        |               |                                  |                                          | 50%                        | chr5       | 112175247 | CT        | -       | 19%               | 37%                        | 831.42  | 1769               | 328                              | ---                                                 | APC     | Deletion pathogenic | 1319  | Codon 1319, Frameshift causing a premature stop |
|        |               |                                  |                                          | 50%                        | chr5       | 149433596 | T         | G       | 100%              | 200%                       | 6787.94 | 594                | 594                              | ---                                                 | CSF1R   | SNP                 |       | 3' UTR variant                                  |
|        |               |                                  |                                          | 50%                        | chr5       | 149433597 | G         | A       | 95%               | 191%                       | 8952.71 | 625                | 596                              | ---                                                 | CSF1R   | SNP                 |       | 3' UTR variant                                  |
|        |               |                                  |                                          | 50%                        | chr7       | 55249063  | G         | A       | 51%               | 102%                       | 5759.33 | 1106               | 565                              | ---                                                 | EGFR    | SNP                 |       | protein coding, synonymous variant              |
|        |               |                                  |                                          | 50%                        | chr10      | 43613843  | G         | T       | 49%               | 98%                        | 9850.17 | 1998               | 980                              | ---                                                 | RET     | SNP                 | 769   | Codon 769, Synonymous variant (28%)             |
|        |               |                                  |                                          | 50%                        | chr11      | 534242    | A         | G       | 49%               | 98%                        | 4824.38 | 978                | 481                              | COSM249860                                          | HRAS    | SNP                 | 27    | Codon 27, Synonymous variant (30%)              |
|        |               |                                  |                                          | 50%                        | chr13      | 28610183  | A         | G       | 100%              | 200%                       | 32002.2 | 1998               | 1998                             | ---                                                 | FLT3    | SNP                 |       | Splice region variant (38%)                     |
| 50%    | chr17         | 7579472                          | G                                        | C                          | 50%        | 99%       | 4515.7    | 885     | 439               | ---                        | TP53    | Missense tolerated | 72                               | Missense variant, proline to argine, non-pathogenic |         |                     |       |                                                 |
| 50%    | chr18         | 48586344                         | C                                        | T                          | 55%        | 110%      | 11810.3   | 2000    | 1102              | ---                        | SMAD4   | SNP                |                                  | Intronic variant                                    |         |                     |       |                                                 |
| PF03   | 62.80%        | Tubular Adenoma Descending Colon | Control: two small polyps mixed together | 35%                        | chr2       | 209113192 | G         | A       | 51%               | 145%                       | 10367.7 | 2000               | 1013                             | NOCOSMIC105                                         | IDH1    | SNP                 | 105   | Codon 105, Synonymous variant (5%)              |
|        |               |                                  |                                          | 35%                        | chr4       | 1807894   | G         | A       | 100%              | 286%                       | 18833.3 | 1180               | 1180                             | ---                                                 | FGFR3   | SNP                 |       | Protein coding, Synonymous                      |
|        |               |                                  |                                          | 35%                        | chr4       | 55141055  | A         | G       | 100%              | 286%                       | 31865.7 | 1988               | 1988                             | ---                                                 | PDGFRA  | SNP                 |       | Protein coding, synonymous                      |
|        |               |                                  |                                          | 35%                        | chr4       | 55593464  | A         | C       | 49%               | 140%                       | 9803.62 | 1997               | 977                              | COSM28026                                           | KIT     | Missense tolerated  | 537   | Codon 537, Missense (M>L) - Tolerated           |
|        |               |                                  |                                          | 35%                        | chr4       | 55962546  | -         | G       | 43%               | 122%                       | 5062.97 | 1993               | 848                              | ---                                                 | KDR     | insertion           |       | Noncoding region, unknown                       |
|        |               |                                  |                                          | 35%                        | chr4       | 55972974  | T         | A       | 48%               | 138%                       | 9643.22 | 1994               | 966                              | ---                                                 | KDR     | Missense tolerated  | 472   | Codon 472, Missense (Q/H) - Tolerated           |
|        |               |                                  |                                          | 35%                        | chr4       | 55980239  | C         | T       | 33%               | 94%                        | 4545.64 | 1740               | 573                              | ---                                                 | KDR     | SNP                 |       | Intronic variant                                |
|        |               |                                  |                                          | 35%                        | chr5       | 112173917 | C         | T       | 2%                | 6%                         | 16.9265 | 2000               | 41                               | COSM18852                                           | APC     | nonsense pathogenic | 876   | Codon 876, Stop gained                          |
|        |               |                                  |                                          | 35%                        | chr5       | 112175576 | C         | T       | 2%                | 6%                         | 19.0173 | 1998               | 42                               | COSM18836                                           | APC     | nonsense pathogenic | 1429  | Codon 1429, Stop gained                         |
|        |               |                                  |                                          | 35%                        | chr5       | 112175770 | G         | A       | 60%               | 171%                       | 13460.4 | 1998               | 1196                             | ---                                                 | APC     | SNP                 | 1493  | Codon 1493, Synonymous variant                  |
|        |               |                                  |                                          | 35%                        | chr5       | 149433596 | T         | G       | 100%              | 286%                       | 11239.6 | 986                | 986                              | ---                                                 | CSF1R   | SNP                 |       | 3' UTR variant                                  |
|        |               |                                  |                                          | 35%                        | chr5       | 149433597 | G         | A       | 97%               | 278%                       | 15140.3 | 1012               | 986                              | ---                                                 | CSF1R   | SNP                 |       | 3' UTR variant                                  |
|        |               |                                  |                                          | 35%                        | chr7       | 55249063  | G         | A       | 100%              | 286%                       | 20003.1 | 1262               | 1262                             | ---                                                 | EGFR    | SNP                 |       | Protein coding, Synonymous                      |
|        |               |                                  |                                          | 35%                        | chr10      | 43613843  | G         | T       | 100%              | 286%                       | 32012.5 | 1996               | 1996                             | ---                                                 | RET     | SNP                 | 769   | Codon 769, Synonymous variant (28%)             |
|        |               |                                  |                                          | 35%                        | chr11      | 534242    | A         | G       | 44%               | 127%                       | 5840.92 | 1388               | 616                              | COSM249860                                          | HRAS    | SNP                 | 27    | Codon 27, Synonymous variant                    |
|        |               |                                  |                                          | 35%                        | chr13      | 28610183  | A         | G       | 100%              | 286%                       | 32079.4 | 2000               | 2000                             | ---                                                 | FLT3    | SNP                 |       | Splice region variant (38%)                     |
| 35%    | chr17         | 7579472                          | G                                        | C                          | 57%        | 163%      | 7110.42   | 1123    | 639               | ---                        | TP53    | Missense tolerated | 72                               | Missense variant (P>R) - Non-pathogenic             |         |                     |       |                                                 |
| 35%    | chr19         | 1220321                          | T                                        | C                          | 52%        | 150%      | 6458.69   | 1192    | 625               | ---                        | STK11   | SNP                |                                  | Intronic variant (35%)                              |         |                     |       |                                                 |
| PF04   | 4.00%         | Tubular Adenoma Descending Colon |                                          | 85%                        | chr2       | 209113192 | G         | A       | 47%               | 55%                        | 9235.82 | 2000               | 941                              | NOCOSMIC105                                         | IDH1    | SNP                 | 105   | Codon 105, Synonymous variant                   |
|        |               |                                  |                                          | 85%                        | chr4       | 1807894   | G         | A       | 100%              | 118%                       | 23088.4 | 1452               | 1452                             | ---                                                 | FGFR3   | SNP                 | 769   | Codon 769, Synonymous variant (28%)             |
|        |               |                                  |                                          | 85%                        | chr4       | 55141055  | A         | G       | 100%              | 118%                       | 31813.9 | 1988               | 1988                             | ---                                                 | PDGFRA  | SNP                 | 567   | Codon 567, Synonymous variant (4%)              |
|        |               |                                  |                                          | 85%                        | chr4       | 55593464  | A         | C       | 52%               | 61%                        | 10788.1 | 1997               | 1038                             | COSM28026                                           | KIT     | Missense tolerated  | 537   | Codon 537, Missense (M>L) - Tolerated           |
|        |               |                                  |                                          | 85%                        | chr4       | 55972974  | T         | A       | 50%               | 59%                        | 10274.7 | 1996               | 1006                             | ---                                                 | KDR     | Missense tolerated  | 472   | Codon 472, Missense (Q/H) - Tolerated           |
|        |               |                                  |                                          | 85%                        | chr5       | 112175240 | G         | T       | 57%               | 67%                        | 10278.4 | 1654               | 944                              | COSM19253                                           | APC     | nonsense pathogenic | 1317  | Codon 1317, Stop gained (E>stop)                |
|        |               |                                  |                                          | 85%                        | chr5       | 112175770 | G         | A       | 78%               | 91%                        | 20380.4 | 1998               | 1553                             | ---                                                 | APC     | SNP                 | 1493  | Codon 1493, Synonymous variant (34%)            |
|        |               |                                  |                                          | 85%                        | chr5       | 149433596 | T         | G       | 100%              | 118%                       | 12312.3 | 1075               | 1075                             | ---                                                 | CSF1R   | SNP                 |       | Downstream gene variant (27%)                   |
|        |               |                                  |                                          | 85%                        | chr5       | 149433597 | G         | A       | 97%               | 114%                       | 16430.8 | 1110               | 1075                             | ---                                                 | CSF1R   | SNP                 |       | Downstream gene variant (29%)                   |

|      |          |                                 |                                                |     |       |           |         |         |      |           |         |                     |      |                                              |                        |                      |      |                                                 |
|------|----------|---------------------------------|------------------------------------------------|-----|-------|-----------|---------|---------|------|-----------|---------|---------------------|------|----------------------------------------------|------------------------|----------------------|------|-------------------------------------------------|
|      |          |                                 |                                                | 85% | chr7  | 55249063  | G       | A       | 100% | 118%      | 22232.5 | 1390                | 1390 | ---                                          | EGFR                   | SNP                  | 742  | Codon 742, Synonymous variant (42%)             |
|      |          |                                 |                                                | 85% | chr10 | 43613843  | G       | T       | 100% | 118%      | 31936.4 | 1991                | 1991 | ---                                          | RET                    | SNP                  | 769  | Codon 769, Synonymous variant (28%)             |
|      |          |                                 |                                                | 85% | chr11 | 534242    | A       | G       | 47%  | 56%       | 7675.63 | 1655                | 784  | COSM249860                                   | HRAS                   | SNP                  | 27   | Codon 27, Synonymous variant (30%)              |
|      |          |                                 |                                                | 85% | chr13 | 28610183  | A       | G       | 100% | 118%      | 31925.3 | 1996                | 1996 | ---                                          | FLT3                   | SNP                  |      | Splice region variant (38%)                     |
|      |          |                                 |                                                | 85% | chr17 | 7579472   | G       | C       | 59%  | 70%       | 8137.54 | 1206                | 717  | ---                                          | TP53                   | Missense tolerated   | 72   | Codon 72, Missense variant (P/R) Tolerated      |
|      |          |                                 |                                                | 85% | chr19 | 1220321   | T       | C       | 49%  | 58%       | 7158.33 | 1447                | 716  | ---                                          | STK11                  | SNP                  |      | Intronic variant (35%)                          |
| PF05 | 1157.00% | Invasive Carcinoma              | Not used in final dataset because of pathology | 35% | chr2  | 212812097 | T       | C       | 61%  | 174%      | 6096.98 | 884                 | 538  | ---                                          | ERBB4                  | SNP                  |      | Intronic variant (33%)                          |
|      |          |                                 |                                                | 35% | chr3  | 178917005 | A       | G       | 66%  | 189%      | 7521.24 | 962                 | 636  | ---                                          | PIK3CA                 | SNP                  |      | Downstream gene variant (22%)                   |
|      |          |                                 |                                                | 35% | chr3  | 178947827 | G       | T       | 36%  | 102%      | 5970.27 | 1999                | 715  | COSM769                                      | PIK3CA                 | Missense pathogenic  | 901  | Codon 901, Missense (C>F) - Deleterious         |
|      |          |                                 |                                                | 35% | chr4  | 1807894   | G       | A       | 100% | 286%      | 14778.5 | 927                 | 927  | ---                                          | FGFR3                  | SNP                  | 651  | Codon 651, Synonymous variant                   |
|      |          |                                 |                                                | 35% | chr4  | 55141055  | A       | G       | 100% | 286%      | 22135.5 | 1385                | 1385 | ---                                          | PDGFRA                 | SNP                  | 567  | Codon 567, Synonymous variant                   |
|      |          |                                 |                                                | 35% | chr4  | 55593464  | A       | C       | 47%  | 134%      | 9128.8  | 1998                | 934  | COSM28026                                    | KIT                    | Missense tolerated   | 541  | Codon 541, Missense (M>L) - Tolerated           |
|      |          |                                 |                                                | 35% | chr4  | 55980239  | C       | T       | 100% | 286%      | 12875.1 | 810                 | 810  | ---                                          | KDR                    | SNP                  |      | Intronic variant (49%)                          |
|      |          |                                 |                                                | 35% | chr5  | 112175770 | G       | A       | 99%  | 282%      | 31135   | 1999                | 1974 | ---                                          | APC                    | SNP                  | 1493 | Codon 1493, Synonymous variant (34%)            |
|      |          |                                 |                                                | 35% | chr5  | 149433597 | G       | A       | 31%  | 87%       | 2837.92 | 1226                | 375  | ---                                          | CSF1R                  | SNP                  |      | Downstream gene variant (29%)                   |
|      |          |                                 |                                                | 35% | chr7  | 55249063  | G       | A       | 55%  | 159%      | 6475.81 | 1085                | 602  | ---                                          | EGFR                   | SNP                  | 742  | Codon 742, Synonymous variant (42%)             |
|      |          |                                 |                                                | 35% | chr7  | 140453136 | A       | T       | 25%  | 71%       | 3259.2  | 1994                | 493  | COSM476                                      | BRAF                   | Missense pathogenic  | 600  | Codon 600, Missense (V>E) - Pathogenic          |
|      |          |                                 |                                                | 35% | chr10 | 43613843  | G       | T       | 57%  | 162%      | 12408.6 | 1997                | 1135 | ---                                          | RET                    | SNP                  | 769  | Codon 769, Synonymous variant (28%)             |
|      |          |                                 |                                                | 35% | chr11 | 534242    | A       | G       | 100% | 286%      | 19696.9 | 1247                | 1247 | COSM249860                                   | HRAS                   | SNP                  | 27   | Codon 27, Synonymous variant                    |
|      |          |                                 |                                                | 35% | chr13 | 28610183  | A       | G       | 100% | 286%      | 32037.3 | 1999                | 1999 | ---                                          | FLT3                   | SNP                  |      | Splice region variant (38%)                     |
|      |          |                                 |                                                | 35% | chr17 | 7578406   | C       | T       | 37%  | 106%      | 6348.42 | 1999                | 742  | COSM99914                                    | TP53                   | Missense pathogenic  | 175  | Codon 175, Missense (R>H) - Pathogenic          |
| 35%  | chr17    | 7579472                         | G                                              | C   | 93%   | 265%      | 13946.1 | 1014    | 942  | ---       | TP53    | Missense tolerated  | 72   | Codon 72, Missense variant (P>R) - Tolerated |                        |                      |      |                                                 |
| 35%  | chr17    | 7579473                         | G                                              | C   | 6%    | 18%       | 104.53  | 1014    | 63   | ---       | TP53    | Missense tolerated  | 72   | Codon 72, Missense variant (P>A) - Tolerated |                        |                      |      |                                                 |
| 35%  | chr18    | 48591919                        | G                                              | A   | 23%   | 66%       | 2911.01 | 1998    | 462  | COSM14122 | SMAD4   | Missense pathogenic | 361  | Codon 361, Missense (R>H) - Pathogenic       |                        |                      |      |                                                 |
| PF06 | -32.30%  | Tubular Adenoma Ascending Colon |                                                | 75% | chr2  | 212812097 | T       | C       | 50%  | 67%       | 500.97  | 103                 | 52   | ---                                          | ERBB4                  | SNP                  |      | Intronic variant (33%)                          |
|      |          |                                 |                                                | 75% | chr3  | 178917005 | A       | G       | 100% | 133%      | 1785.86 | 117                 | 117  | ---                                          | PIK3CA                 | SNP                  |      | Downstream gene variant (22%)                   |
|      |          |                                 |                                                | 75% | chr3  | 178927410 | A       | G       | 61%  | 81%       | 1092.86 | 165                 | 100  | ---                                          | PIK3CA                 | Missense tolerated   | 391  | Codon 391, Missense (I>M) - Tolerated           |
|      |          |                                 |                                                | 75% | chr4  | 1807894   | G       | A       | 100% | 133%      | 31887.1 | 1995                | 1995 | ---                                          | FGFR3                  | SNP                  | 651  | Codon 651, Synonymous variant (4%)              |
|      |          |                                 |                                                | 75% | chr4  | 55141055  | A       | G       | 100% | 133%      | 6400.18 | 407                 | 407  | ---                                          | PDGFRA                 | SNP                  | 567  | Codon 567, Synonymous variant (4%)              |
|      |          |                                 |                                                | 75% | chr4  | 55972974  | T       | A       | 58%  | 77%       | 1904.72 | 306                 | 177  | ---                                          | KDR                    | Missense tolerated   | 472  | Codon 472, Missense (Q>H) - Tolerated           |
|      |          |                                 |                                                | 75% | chr4  | 55980239  | C       | T       | 33%  | 44%       | 475.18  | 183                 | 60   | ---                                          | KDR                    | SNP                  |      | Intronic variant (48%)                          |
|      |          |                                 |                                                | 75% | chr5  | 112175589 | C       | T       | 6%   | 9%        | 49.37   | 371                 | 24   | ---                                          | APC                    | Missense Deleterious | 1433 | Codon 1433, Missense (P>L) - Deleterious        |
|      |          |                                 |                                                | 75% | chr5  | 149433597 | G       | A       | 18%  | 24%       | 679.5   | 700                 | 127  | ---                                          | CSF1R                  | SNP                  |      | Downstream gene variant (29%)                   |
|      |          |                                 |                                                | 75% | chr7  | 55249063  | G       | A       | 51%  | 68%       | 1239.17 | 237                 | 121  | ---                                          | EGFR                   | SNP                  |      | Intronic variant (42%)                          |
|      |          |                                 |                                                | 75% | chr13 | 28610183  | A       | G       | 58%  | 77%       | 12684.9 | 2000                | 1152 | ---                                          | FLT3                   | SNP                  |      | Splice region variant (38%)                     |
|      |          |                                 |                                                | 75% | chr17 | 7579472   | G       | C       | 59%  | 78%       | 986.38  | 157                 | 92   | ---                                          | TP53                   | Missense tolerated   | 72   | Codon 72, Missense (P>R) - Tolerated            |
|      | 75%      | chr19                           | 1220321                                        | T   | C     | 100%      | 133%    | 9379.76 | 596  | 596       | ---     | STK11               | SNP  |                                              | Intronic variant (35%) |                      |      |                                                 |
| PF07 | 0%       | Tubular Adenoma Sigmoid Colon   |                                                | 65% | 1     | 43815035  | C       | T       | 51%  | 79%       | 7435.67 | 1413                | 725  | ---                                          | MPL                    | Missense Deleterious | 524  | Codon 524, Missense (R>C) - Deleterious, benign |
|      |          |                                 |                                                | 65% | 4     | 1807894   | G       | A       | 100% | 154%      | 15121.5 | 956                 | 956  | ---                                          | FGFR3                  | SNP                  | 651  | Codon 651, Synonymous variant                   |
|      |          |                                 |                                                | 65% | 4     | 55972974  | T       | A       | 100% | 154%      | 10428.7 | 1327                | 1327 | ---                                          | KDR                    | Missense tolerated   | 472  | Codon 472, Missense (Q>H) - Tolerated           |

|      |         |                                 |                                                                                                  |      |           |           |         |         |      |         |         |      |                    |                         |                                              |                      |                                                  |                                                                                     |
|------|---------|---------------------------------|--------------------------------------------------------------------------------------------------|------|-----------|-----------|---------|---------|------|---------|---------|------|--------------------|-------------------------|----------------------------------------------|----------------------|--------------------------------------------------|-------------------------------------------------------------------------------------|
|      |         |                                 |                                                                                                  | 65%  | 4         | 55141055  | A       | G       | 51%  | 78%     | 21200.1 | 1994 | 1015               | ---                     | CSF1R                                        | SNP                  | 567                                              | Codon 567, Synonymous variant                                                       |
|      |         |                                 |                                                                                                  | 65%  | 5         | 112175770 | G       | A       | 98%  | 151%    | 30794.5 | 1999 | 1964               | ---                     | APC                                          | SNP                  | 1439                                             | Codon 1493, Synonymous variant                                                      |
|      |         |                                 |                                                                                                  | 65%  | 5         | 149433596 | T       | G       | 100% | 154%    | 5096.06 | 565  | 564                | ---                     | CSF1R                                        | SNP                  |                                                  | Downstream gene variant                                                             |
|      |         |                                 |                                                                                                  | 65%  | 5         | 149433597 | G       | A       | 97%  | 149%    | 8848.3  | 592  | 574                | ---                     | CSF1R                                        | SNP                  |                                                  | Downstream gene variant                                                             |
|      |         |                                 |                                                                                                  | 65%  | 10        | 43613843  | G       | T       | 48%  | 75%     | 9668.84 | 1998 | 968                | ---                     | RET                                          | SNP                  | 769                                              | Codon 769, Synonymous variant (28%)                                                 |
|      |         |                                 |                                                                                                  | 65%  | 10        | 43615633  | C       | G       | 50%  | 77%     | 7504.11 | 1476 | 739                | ---                     | RET                                          | SNP                  | 904                                              | Codon 904, Synonymous variant (16%)                                                 |
|      |         |                                 |                                                                                                  | 65%  | 11        | 534242    | A       | G       | 46%  | 71%     | 5228.01 | 1171 | 541                | COSM249860              | HRAS                                         | SNP                  | 27                                               | Codon 27, Synonymous variant                                                        |
|      |         |                                 |                                                                                                  | 65%  | 13        | 28610183  | A       | G       | 100% | 154%    | 31886.9 | 1995 | 1995               | ---                     | FLT3                                         | SNP                  |                                                  | Splice region variant (38%)                                                         |
|      |         |                                 |                                                                                                  | 65%  | 17        | 7579472   | G       | C       | 92%  | 142%    | 12837.1 | 942  | 868                | ---                     | TP53                                         | Missense tolerated   | 72                                               | Codon 72, Missense (P/R) - Tolerated                                                |
| PF08 | 136.40% | Tubular Adenoma Sigmoid Colon   |                                                                                                  | 55%  | chr2      | 212812097 | T       | C       | 41%  | 74%     | 3859.67 | 1060 | 431                | ---                     | ERBB4                                        | SNP                  |                                                  | Intronic variant (33%)                                                              |
|      |         |                                 |                                                                                                  | 55%  | chr4      | 1807894   | G       | A       | 100% | 182%    | 20002.8 | 1259 | 1259               | ---                     | FGFR3                                        | SNP                  | 651                                              | Codon 651, Synonymous variant (4%)                                                  |
|      |         |                                 |                                                                                                  | 55%  | chr4      | 55141055  | A       | G       | 100% | 182%    | 20202.5 | 1270 | 1270               | ---                     | PDGFRA                                       | SNP                  | 567                                              | Codon 567, Synonymous variant (3%)                                                  |
|      |         |                                 |                                                                                                  | 55%  | chr4      | 55152040  | C       | T       | 47%  | 85%     | 9101.31 | 2000 | 932                | COSM22413               | PDGFRA                                       | SNP                  | 584                                              | Codon 584, Synonymous variant (21%)                                                 |
|      |         |                                 |                                                                                                  | 55%  | chr4      | 55593464  | A       | C       | 50%  | 90%     | 10072.8 | 1995 | 993                | COSM28026               | KIT                                          | Missense tolerated   | 541                                              | Codon 541, Missense (M>L) - Tolerated                                               |
|      |         |                                 |                                                                                                  | 55%  | chr4      | 55962546  | -       | G       | 100% | 182%    | 16238.7 | 1344 | 1344               | ---                     | KDR                                          | insertion            |                                                  | Noncoding region, unknown                                                           |
|      |         |                                 |                                                                                                  | 55%  | chr4      | 55972974  | T       | A       | 100% | 182%    | 31976.2 | 1995 | 1995               | ---                     | KDR                                          | Missense tolerated   | 472                                              | Codon 472, Missense (Q/H) - Tolerated                                               |
|      |         |                                 |                                                                                                  | 55%  | chr4      | 55980239  | C       | T       | 100% | 182%    | 14334.2 | 910  | 910                | ---                     | KDR                                          | SNP                  |                                                  | Intronic variant (49%)                                                              |
|      |         |                                 |                                                                                                  | 55%  | chr5      | 112175588 | C       | -       | 27%  | 48%     | 1963.31 | 1932 | 512                | ---                     | APC                                          | Deletion pathogenic  | 1433                                             | Codon 1433, Frameshift causing a premature stop                                     |
|      |         |                                 |                                                                                                  | 55%  | chr5      | 112175770 | G       | A       | 98%  | 178%    | 30546.9 | 2000 | 1957               | ---                     | APC                                          | SNP                  | 1439                                             | Codon 1493, Synonymous variant (34%)                                                |
|      |         |                                 |                                                                                                  | 55%  | chr5      | 149433597 | G       | A       | 21%  | 38%     | 1673.7  | 1352 | 284                | ---                     | CSF1R                                        | SNP                  |                                                  | Downstream gene variant                                                             |
|      |         |                                 |                                                                                                  | 55%  | chr7      | 55233037  | C       | T       | 32%  | 59%     | 5123.81 | 1998 | 649                | COSM21689               | EGFR                                         | Missense Deleterious | 596                                              | Codon 596, Missense (P/L) - Deleterious                                             |
|      |         |                                 |                                                                                                  | 55%  | chr10     | 43613843  | G       | T       | 100% | 182%    | 31972.6 | 1994 | 1994               | ---                     | RET                                          | SNP                  | 769                                              | Codon 769, Synonymous variant (28%)                                                 |
|      |         |                                 |                                                                                                  | 55%  | chr10     | 43615633  | C       | G       | 56%  | 101%    | 7233.27 | 1197 | 668                | ---                     | RET                                          | SNP                  | 904                                              | Codon 904, Synonymous variant (16%)                                                 |
|      |         |                                 |                                                                                                  | 55%  | chr11     | 534242    | A       | G       | 47%  | 86%     | 6239.18 | 1341 | 634                | COSM249860              | HRAS                                         | SNP                  | 27                                               | Codon 27, Synonymous variant (30%)                                                  |
|      | 55%     | chr13                           | 28610183                                                                                         | A    | G         | 100%      | 182%    | 31881.4 | 1995 | 1995    | ---     | FLT3 | SNP                |                         | Splice region variant (38%)                  |                      |                                                  |                                                                                     |
|      | 55%     | chr17                           | 7579472                                                                                          | G    | C         | 57%       | 103%    | 5807.83 | 932  | 528     | ---     | TP53 | Missense tolerated | 72                      | Codon 72, Missense variant (P>R) - Tolerated |                      |                                                  |                                                                                     |
| PF11 | 75.20%  | Tubular Adenoma Ascending Colon | Note: CTNNB1 p.S45F variant (cosmic 5667) failed to be validated by qPCR and was thus eliminated | 45%  | chr1      | 43815035  | C       | T       | 39%  | 86%     | 3410.82 | 1014 | 392                | ---                     | MPL                                          | Missense pathogenic  | 524                                              | Missense variant (arg>cys), codon 524, mH3K27Ac mark, conflicting predicted effects |
|      |         |                                 | 45%                                                                                              | chr2 | 209113192 | G         | A       | 44%     | 97%  | 8215.44 | 1998    | 874  | NOCOSMIC105        | IDH1                    | SNP                                          | 105                  | Synonymous variant, codon 105                    |                                                                                     |
|      |         |                                 | 45%                                                                                              | chr2 | 212812097 | T         | C       | 53%     | 117% | 10989.6 | 1999    | 1051 | ---                | ERBB4                   | SNP                                          |                      | Intronic variant (33%)                           |                                                                                     |
|      |         |                                 | 45%                                                                                              | chr3 | 41266137  | C         | T       | 4%      | 10%  | 62.02   | 1998    | 86   | COSM5667           | CTNNB1                  | Missense pathogenic                          | 45                   | Missense variant (Ser>Phe), pathogenic, codon 45 |                                                                                     |
|      |         |                                 | 45%                                                                                              | chr3 | 178917005 | A         | G       | 41%     | 91%  | 7444.32 | 1998    | 820  | ---                | PIK3CA                  | SNP                                          |                      | Downstream gene variant (22%)                    |                                                                                     |
|      |         |                                 | 45%                                                                                              | chr4 | 1807894   | G         | A       | 100%    | 222% | 7109.2  | 453     | 453  | ---                | FGFR3                   | SNP                                          | 651                  | Codon 651, Synonymous variant (4%)               |                                                                                     |
|      |         |                                 | 45%                                                                                              | chr4 | 55141055  | A         | G       | 100%    | 222% | 31912   | 1991    | 1991 | ---                | PDGFRA                  | SNP                                          | 567                  | Codon 567, Synonymous variant (4%)               |                                                                                     |
|      |         |                                 | 45%                                                                                              | chr4 | 55152040  | C         | T       | 81%     | 181% | 22040.4 | 1998    | 1628 | COSM22413          | PDGFRA                  | SNP                                          |                      | Codon 584, Synonymous variant (21%)              |                                                                                     |
|      |         |                                 | 45%                                                                                              | chr4 | 55972974  | T         | A       | 42%     | 93%  | 7615.76 | 1992    | 831  | ---                | KDR                     | Missense tolerated                           | 472                  | Codon 472, Missense (Q>H) - Tolerated            |                                                                                     |
|      |         |                                 | 45%                                                                                              | chr5 | 112175770 | G         | A       | 91%     | 202% | 26451.2 | 1998    | 1812 | ---                | APC                     | SNP                                          | 1493                 | Synonymous, codon 1493                           |                                                                                     |
| 45%  | chr5    | 149433597                       | G                                                                                                | A    | 70%       | 156%      | 8096.22 | 935     | 657  | ---     | CSF1R   | SNP  |                    | Downstream gene variant |                                              |                      |                                                  |                                                                                     |
| 45%  | chr7    | 55249063                        | G                                                                                                | A    | 54%       | 121%      | 4889.59 | 843     | 459  | ---     | EGFR    | SNP  |                    | Intronic variant (42%)  |                                              |                      |                                                  |                                                                                     |

|      |        |                               |     |       |           |     |         |      |      |           |       |                     |            |                                                                                  |                      |      |                                                            |
|------|--------|-------------------------------|-----|-------|-----------|-----|---------|------|------|-----------|-------|---------------------|------------|----------------------------------------------------------------------------------|----------------------|------|------------------------------------------------------------|
|      |        |                               | 45% | chr10 | 43613843  | G   | T       | 84%  | 186% | 21910.2   | 1900  | 1594                | ---        | RET                                                                              | SNP                  | 769  | Codon 769, Synonymous variant (28%)                        |
|      |        |                               | 45% | chr10 | 43615633  | C   | G       | 37%  | 82%  | 4266.92   | 1368  | 504                 | ---        | RET                                                                              | SNP                  | 904  | Codon 904, Synonymous variant (16%)                        |
|      |        |                               | 45% | chr13 | 28602292  | T   | C       | 41%  | 91%  | 7448.02   | 1995  | 821                 | ---        | FLT3                                                                             | SNP                  |      | Intronic variant (4%)                                      |
|      |        |                               | 45% | chr13 | 28610183  | A   | G       | 93%  | 206% | 27621.2   | 2000  | 1858                | ---        | FLT3                                                                             | SNP                  |      | Splice region variant (38%)                                |
|      |        |                               | 45% | chr17 | 7579472   | G   | C       | 65%  | 145% | 5109.71   | 672   | 437                 | ---        | TP53                                                                             | Missense tolerated   | 72   | Codon 72, Missense (P/R) - Tolerated                       |
|      |        |                               | 45% | chr19 | 1220321   | T   | C       | 18%  | 41%  | 391.55    | 391   | 72                  | ---        | STK11                                                                            | SNP                  |      | Intronic variant (35%)                                     |
| PF12 | 75.00% | Tubular Adenoma Sigmoid Colon | 80% | chr2  | 212812097 | T   | C       | 57%  | 71%  | 9502.44   | 1540  | 872                 | ---        | ERBB4                                                                            | SNP                  |      | Intronic variant (33%)                                     |
|      |        |                               | 80% | chr4  | 1807894   | G   | A       | 100% | 125% | 19470.8   | 1226  | 1226                | ---        | FGFR3                                                                            | SNP                  | 651  | Codon 651, Synonymous variant (4%)                         |
|      |        |                               | 80% | chr4  | 55141055  | A   | G       | 100% | 125% | 31802.1   | 1991  | 1991                | ---        | PDGFRA                                                                           | SNP                  | 567  | Codon 567, Synonymous variant (4%)                         |
|      |        |                               | 80% | chr4  | 55962546  | -   | G       | 46%  | 57%  | 5704.05   | 1983  | 903                 | ---        | KDR                                                                              | Insertion            |      | Noncoding region, unknown                                  |
|      |        |                               | 80% | chr4  | 55972974  | T   | A       | 52%  | 65%  | 10704.7   | 1993  | 1032                | ---        | KDR                                                                              | Missense tolerated   | 472  | Codon 472, Missense (Q>H) - Tolerated                      |
|      |        |                               | 80% | chr5  | 112175255 | G   | T       | 32%  | 40%  | 5039.7    | 2000  | 643                 | COSM18702  | APC                                                                              | Nonsense pathogenic  | 1322 | Truncation, codon 1322 (E>stop)                            |
|      |        |                               | 80% | chr5  | 112175770 | G   | A       | 99%  | 124% | 31251.5   | 1993  | 1974                | ---        | APC                                                                              | SNP                  | 1493 | Synonymous, codon 1493                                     |
|      |        |                               | 80% | chr5  | 149433597 | G   | A       | 32%  | 40%  | 5041.74   | 1999  | 643                 | ---        | CSF1R                                                                            | SNP                  |      | Downstream gene variant                                    |
|      |        |                               | 80% | chr7  | 55249063  | G   | A       | 50%  | 63%  | 5562.47   | 1084  | 546                 | ---        | EGFR                                                                             | SNP                  |      | Intronic variant (42%)                                     |
|      |        |                               | 80% | chr10 | 43613843  | G   | T       | 100% | 125% | 31970.9   | 1993  | 1993                | ---        | RET                                                                              | SNP                  | 769  | Codon 769, Synonymous variant (28%)                        |
|      |        |                               | 80% | chr11 | 108138003 | T   | C       | 49%  | 61%  | 9905.56   | 1999  | 983                 | COSM21826  | ATM                                                                              | Missense tolerated   | 858  | Missense variant (phe>leu) protein position 858, tolerated |
|      |        |                               | 80% | chr13 | 28610183  | A   | G       | 100% | 125% | 31986.1   | 1997  | 1997                | ---        | FLT3                                                                             | SNP                  |      | Splice region variant (38%)                                |
|      |        |                               | 80% | chr17 | 7579472   | G   | C       | 96%  | 120% | 15461.7   | 1044  | 1006                | ---        | TP53                                                                             | Missense tolerated   | 72   | Codon 72, Missense (P/R) - Tolerated                       |
|      |        |                               | 80% | chr19 | 1220321   | T   | C       | 44%  | 55%  | 4102.36   | 994   | 436                 | ---        | STK11                                                                            | SNP                  |      | Intronic variant (35%)                                     |
| PF13 | 58.80% | Tubular Adenoma               | 78% | chr4  | 1807894   | G   | A       | 100% | 128% | 31725.4   | 1986  | 1986                | ---        | FGFR3                                                                            | SNP                  | 651  | Codon 651, Synonymous variant                              |
|      |        |                               | 78% | chr4  | 55141055  | A   | G       | 100% | 128% | 16443.4   | 1031  | 1031                | ---        | PDGFRA                                                                           | SNP                  | 567  | Codon 567, Synonymous variant (4%)                         |
|      |        |                               | 78% | chr4  | 55946354  | G   | T       | 49%  | 63%  | 9830.42   | 2000  | 980                 | ---        | KDR                                                                              | SNP                  |      | Intronic variant                                           |
|      |        |                               | 78% | chr4  | 55962546  | -   | G       | 100% | 128% | 24427.9   | 1987  | 1987                | ---        | KDR                                                                              | Insertion unknown    |      | Noncoding region, unknown                                  |
|      |        |                               | 78% | chr4  | 55972974  | T   | A       | 100% | 128% | 10160.9   | 639   | 639                 | ---        | KDR                                                                              | Missense tolerated   | 472  | Codon 472, Missense (Q>H) - Tolerated                      |
|      |        |                               | 78% | chr4  | 153250883 | G   | A       | 4%   | 5%   | 42.61     | 1996  | 78                  | COSM22973  | FBXW7                                                                            | Nonsense pathogenic? | 393  | Stop gained, R>stop (in the Notch pathway)                 |
|      |        |                               | 78% | chr5  | 112175589 | C   | T       | 9%   | 12%  | 430.31    | 1592  | 151                 | ---        | APC                                                                              | Missense Deleterious | 1433 | Codon 1433, Missense (P>L) - Deleterious                   |
|      |        |                               | 78% | chr5  | 112175690 | CC  | -       | 26%  | 33%  | 1779.84   | 1849  | 475                 | ---        | APC                                                                              | Deletion unknown     | 1467 | frameshift variant, codon 1467                             |
|      |        |                               | 78% | chr5  | 112175770 | G   | A       | 50%  | 64%  | 6133.12   | 1213  | 607                 | ---        | APC                                                                              | SNP                  | 1493 | Synonymous, codon 1493                                     |
|      |        |                               | 78% | chr5  | 149433596 | T   | G       | 100% | 128% | 9068.15   | 793   | 793                 | ---        | CSF1R                                                                            | SNP                  |      | Downstream gene variant                                    |
|      |        |                               | 78% | chr5  | 149433597 | G   | A       | 97%  | 125% | 12172.3   | 814   | 791                 | ---        | CSF1R                                                                            | SNP                  |      | Downstream gene variant                                    |
|      |        |                               | 78% | chr7  | 55249063  | G   | A       | 100% | 128% | 7589.93   | 479   | 479                 | ---        | EGFR                                                                             | SNP                  |      | Intronic variant (42%)                                     |
|      |        |                               | 78% | chr11 | 534242    | A   | G       | 48%  | 61%  | 9380.27   | 1995  | 949                 | COSM249860 | HRAS                                                                             | SNP                  | 27   | Codon 27, Synonymous variant (30%)                         |
|      |        |                               | 78% | chr13 | 28610183  | A   | G       | 100% | 128% | 31970.2   | 1996  | 1996                | ---        | FLT3                                                                             | SNP                  |      | Splice region variant (38%)                                |
|      |        |                               | 78% | chr17 | 7579472   | G   | C       | 95%  | 122% | 3939.05   | 276   | 263                 | ---        | TP53                                                                             | Missense tolerated   | 72   | Codon 72, Missense (P/R) - Tolerated                       |
| 78%  | chr19  | 1220321                       | T   | C     | 46%       | 59% | 3948.08 | 897  | 413  | ---       | STK11 | SNP                 |            | Intronic variant (35%)                                                           |                      |      |                                                            |
| 78%  | chr19  | 1223125                       | C   | G     | 51%       | 65% | 5353.21 | 1031 | 524  | COSM21360 | STK11 | Missense pathogenic | 110/354    | Missense variant (phe>leu) reported to be associated with Peutz-Jeghers syndrome |                      |      |                                                            |
| PF14 | 47.70% | Tubular Adenoma Rectum        | 90% | chr3  | 178917005 | A   | G       | 49%  | 55%  | 7460.72   | 1513  | 745                 | ---        | PIK3CA                                                                           | SNP                  |      | Downstream gene variant (22%)                              |
|      |        |                               | 90% | chr4  | 1807894   | G   | A       | 100% | 111% | 24012.5   | 1509  | 1509                | ---        | FGFR3                                                                            | SNP                  | 651  | Codon 651, Synonymous variant (4%)                         |
|      |        |                               | 90% | chr4  | 55141055  | A   | G       | 100% | 111% | 31842.3   | 1988  | 1988                | ---        | PDGFRA                                                                           | SNP                  | 567  | Codon 567, Synonymous variant (4%)                         |
|      |        |                               | 90% | chr4  | 55972974  | T   | A       | 50%  | 56%  | 10273.7   | 1997  | 1006                | ---        | KDR                                                                              | Missense tolerated   | 472  | Codon 472, Missense (Q>H) - Tolerated                      |

|      |         |                           |     |       |           |       |         |      |      |         |       |                    |            |                                      |                      |      |                                                   |
|------|---------|---------------------------|-----|-------|-----------|-------|---------|------|------|---------|-------|--------------------|------------|--------------------------------------|----------------------|------|---------------------------------------------------|
|      |         |                           | 90% | chr5  | 112175216 | GAAA  | -       | 71%  | 78%  | 9776.48 | 1544  | 1090               | COSM19145  | APC                                  | Missense pathogenic  | 1307 | Truncation, codon 1307                            |
|      |         |                           | 90% | chr5  | 112175217 | AAAAG | -       | 71%  | 78%  | 9776.48 | 1544  | 1090               | COSM18701  | APC                                  | Missense pathogenic  | 1307 | Truncation, codon 1307                            |
|      |         |                           | 90% | chr5  | 112175213 | AAAGA | -       | 71%  | 78%  | 9776.48 | 1544  | 1090               | COSM19263  | APC                                  | Missense pathogenic  | 1307 | Truncation, codon 1307                            |
|      |         |                           | 90% | chr5  | 112175218 | AAAGA | -       | 71%  | 78%  | 9776.48 | 1544  | 1090               | COSM13113  | APC                                  | Missense pathogenic  | 1307 | Truncation, codon 1307                            |
|      |         |                           | 90% | chr5  | 112175212 | AAAAG | -       | 71%  | 78%  | 9776.48 | 1544  | 1090               | COSM18764  | APC                                  | Missense pathogenic  | 1307 | Truncation, codon 1307                            |
|      |         |                           | 90% | chr5  | 112175770 | G     | A       | 99%  | 110% | 31159.2 | 1996  | 1973               | ---        | APC                                  | SNP                  | 1493 | Synonymous, codon 1493                            |
|      |         |                           | 90% | chr5  | 149433596 | T     | G       | 100% | 111% | 12205.4 | 1068  | 1068               | ---        | CSF1R                                | SNP                  |      | Downstream gene variant                           |
|      |         |                           | 90% | chr5  | 149433597 | G     | A       | 97%  | 108% | 16431.7 | 1109  | 1074               | ---        | CSF1R                                | SNP                  |      | Downstream gene variant                           |
|      |         |                           | 90% | chr7  | 55249063  | G     | A       | 100% | 111% | 20626.3 | 1293  | 1293               | ---        | EGFR                                 | SNP                  |      | Intronic variant (42%)                            |
|      |         |                           | 90% | chr10 | 43613843  | G     | T       | 54%  | 60%  | 11373.1 | 1998  | 1075               | ---        | RET                                  | SNP                  | 769  | Codon 769, Synonymous variant (28%)               |
|      |         |                           | 90% | chr11 | 534242    | A     | G       | 50%  | 56%  | 8545.54 | 1685  | 842                | COSM249860 | HRAS                                 | SNP                  | 27   | Codon 27, Synonymous variant (30%)                |
|      |         |                           | 90% | chr13 | 28610183  | A     | G       | 100% | 111% | 31992.9 | 1996  | 1996               | ---        | FLT3                                 | SNP                  |      | Splice region variant (38%)                       |
| 90%  | chr17   | 7579472                   | G   | C     | 96%       | 107%  | 14422.4 | 980  | 941  | ---     | TP53  | Missense tolerated | 72         | Codon 72, Missense (P/R) - Tolerated |                      |      |                                                   |
| PF15 | 47.30%  | Tubular Adenoma Cecum     | 55% | chr2  | 212812097 | T     | C       | 67%  | 122% | 7642.22 | 946   | 635                | ---        | ERBB4                                | SNP                  |      | Intronic variant (33%)                            |
|      |         |                           | 55% | chr4  | 1807894   | G     | A       | 100% | 182% | 18628.5 | 1170  | 1170               | ---        | FGFR3                                | SNP                  | 651  | Codon 651, Synonymous variant (4%)                |
|      |         |                           | 55% | chr4  | 55141055  | A     | G       | 100% | 182% | 31604.7 | 1983  | 1983               | ---        | PDGFRA                               | SNP                  | 567  | Codon 567, Synonymous variant (4%)                |
|      |         |                           | 55% | chr4  | 55980239  | C     | T       | 30%  | 55%  | 2475.25 | 1102  | 331                | ---        | KDR                                  | SNP                  |      | Intronic variant (48%)                            |
|      |         |                           | 55% | chr5  | 112173917 | C     | T       | 24%  | 43%  | 3018.88 | 2000  | 472                | COSM18852  | APC                                  | Nonsense pathogenic  | 876  | Truncation, codon 876, (R>stop)                   |
|      |         |                           | 55% | chr5  | 112175639 | C     | T       | 26%  | 47%  | 3513.93 | 1996  | 516                | COSM13127  | APC                                  | Nonsense pathogenic  | 1450 | Truncation, Codon 1450 (R>stop)                   |
|      |         |                           | 55% | chr5  | 112175770 | G     | A       | 98%  | 179% | 30829.6 | 1997  | 1964               | ---        | APC                                  | SNP                  | 1439 | Synonymous, codon 1493                            |
|      |         |                           | 55% | chr5  | 149433596 | T     | G       | 99%  | 181% | 12344.8 | 1104  | 1098               | ---        | CSF1R                                | SNP                  |      | Downstream gene variant                           |
|      |         |                           | 55% | chr5  | 149433597 | G     | A       | 98%  | 178% | 17211.8 | 1127  | 1105               | ---        | CSF1R                                | SNP                  |      | Downstream gene variant                           |
|      |         |                           | 55% | chr10 | 43613843  | G     | T       | 100% | 182% | 31946.4 | 1992  | 1992               | ---        | RET                                  | SNP                  | 769  | Codon 769, Synonymous variant (28%)               |
|      |         |                           | 55% | chr10 | 43615633  | C     | G       | 52%  | 94%  | 10727.1 | 1997  | 1034               | ---        | RET                                  | SNP                  | 904  | Codon 904, Synonymous variant (16%)               |
|      |         |                           | 55% | chr12 | 25378561  | G     | A       | 3%   | 6%   | 11.85   | 1536  | 47                 | COSM19900  | KRAS                                 | Missense deleterious | 146  | Missense variant (ala>val) codon 146, deleterious |
| 55%  | chr13   | 28610183                  | A   | G     | 55%       | 100%  | 11751.5 | 2000 | 1097 | ---     | FLT3  | SNP                |            | Splice region variant (38%)          |                      |      |                                                   |
| 55%  | chr17   | 7579472                   | G   | C     | 98%       | 179%  | 16904.8 | 1097 | 1078 | ---     | TP53  | Missense tolerated | 72         | Codon 72, Missense (P/R) - Tolerated |                      |      |                                                   |
| 55%  | chr19   | 1220321                   | T   | C     | 52%       | 94%   | 5859.56 | 1090 | 565  | ---     | STK11 | SNP                |            | Intronic variant (35%)               |                      |      |                                                   |
| PF17 | -49.90% | Hyperplastic Polyp Rectum | 90% | chr3  | 178917005 | A     | G       | 51%  | 57%  | 5440.2  | 1030  | 529                | ---        | PIK3CA                               | SNP                  |      | Downstream gene variant (22%)                     |
|      |         |                           | 90% | chr4  | 1807894   | G     | A       | 100% | 111% | 15065.3 | 944   | 944                | ---        | FGFR3                                | SNP                  | 651  | Codon 651, Synonymous variant (4%)                |
|      |         |                           | 90% | chr4  | 55141055  | A     | G       | 100% | 111% | 29010.9 | 1820  | 1820               | ---        | PDGFRA                               | SNP                  | 567  | Codon 567, Synonymous variant (4%)                |
|      |         |                           | 90% | chr5  | 112175770 | G     | A       | 52%  | 58%  | 10833   | 1999  | 1041               | ---        | APC                                  | SNP                  | 1439 | synonymous variant, codon 1493                    |
|      |         |                           | 90% | chr7  | 55249063  | G     | A       | 100% | 111% | 12490.9 | 783   | 783                | ---        | EGFR                                 | SNP                  |      | Intronic variant (42%)                            |
|      |         |                           | 90% | chr7  | 140453136 | A     | T       | 21%  | 24%  | 2545.31 | 1999  | 427                | COSM476    | BRAF                                 | Missense pathogenic  | 600  | Codon 600, Missense (V>E) - Pathogenic            |
|      |         |                           | 90% | chr10 | 43613843  | G     | T       | 100% | 111% | 31935.7 | 1993  | 1993               | ---        | RET                                  | SNP                  | 769  | Codon 769, Synonymous variant (28%)               |
|      |         |                           | 90% | chr13 | 28610183  | A     | G       | 54%  | 60%  | 11405.9 | 2000  | 1076               | ---        | FLT3                                 | SNP                  |      | Splice region variant (38%)                       |
|      |         |                           | 90% | chr17 | 7579472   | G     | C       | 60%  | 67%  | 4270.51 | 627   | 376                | ---        | TP53                                 | Missense tolerated   | 72   | Codon 72, Missense (P/R) - Tolerated              |
| PF18 | -33%    | Tubular Adenoma Rectum    | 83% | chr3  | 178917005 | A     | G       | 49%  | 59%  | 8842.82 | 1809  | 885                | ---        | PIK3CA                               | SNP                  |      | Downstream gene variant (22%)                     |
|      |         |                           | 83% | chr4  | 1807894   | G     | A       | 100% | 120% | 18399.1 | 1158  | 1158               | ---        | FGFR3                                | SNP                  | 651  | Codon 651, Synonymous variant (4%)                |
|      |         |                           | 83% | chr4  | 55141055  | A     | G       | 100% | 120% | 31775.4 | 1988  | 1988               | ---        | PDGFRA                               | SNP                  | 567  | Codon 567, Synonymous variant (4%)                |
|      |         |                           | 83% | chr4  | 55946171  | G     | A       | 49%  | 59%  | 3716.87 | 747   | 368                | ---        | KDR                                  | SNP                  |      | Synonymous variant (1.5%) codon 1336              |

|      |       |                                  |     |       |           |      |         |      |      |         |      |                    |            |                                      |                     |      |                                         |
|------|-------|----------------------------------|-----|-------|-----------|------|---------|------|------|---------|------|--------------------|------------|--------------------------------------|---------------------|------|-----------------------------------------|
|      |       |                                  | 83% | chr4  | 55972974  | T    | A       | 48%  | 58%  | 9456.5  | 1995 | 954                | ---        | KDR                                  | Missense tolerated  | 472  | Codon 472, Missense (Q>H) - Tolerated   |
|      |       |                                  | 83% | chr4  | 55980239  | C    | T       | 100% | 120% | 13465.9 | 843  | 843                | ---        | KDR                                  | SNP                 |      | Intronic variant (48%)                  |
|      |       |                                  | 83% | chr5  | 149433596 | T    | G       | 100% | 120% | 7232.03 | 610  | 610                | ---        | CSF1R                                | SNP                 |      | Downstream gene variant                 |
|      |       |                                  | 83% | chr5  | 149433597 | G    | A       | 96%  | 116% | 9207.62 | 633  | 609                | ---        | CSF1R                                | SNP                 |      | Downstream gene variant                 |
|      |       |                                  | 83% | chr7  | 55249063  | G    | A       | 100% | 120% | 13489   | 852  | 852                | ---        | EGFR                                 | SNP                 |      | Intronic variant (42%)                  |
|      |       |                                  | 83% | chr10 | 43613843  | G    | T       | 51%  | 61%  | 10379.9 | 1999 | 1013               | ---        | RET                                  | SNP                 |      | Codon 769, Synonymous variant (28%)     |
|      |       |                                  | 83% | chr11 | 534242    | A    | G       | 49%  | 59%  | 6976.82 | 1421 | 697                | COSM249860 | HRAS                                 | SNP                 | 27   | Codon 27, Synonymous variant (30%)      |
|      |       |                                  | 83% | chr12 | 25398285  | C    | A       | 6%   | 8%   | 215.59  | 1991 | 129                | COSM516    | KRAS                                 | Missense            | 12   | Missense variant (G/C), codon 12,       |
|      |       |                                  | 83% | chr13 | 28610183  | A    | G       | 100% | 120% | 31871.5 | 1994 | 1994               | ---        | FLT3                                 | SNP                 |      | Splice region variant (38%)             |
|      |       |                                  | 83% | chr13 | 48955528  | A    | C       | 21%  | 26%  | 2507.28 | 2000 | 424                | ---        | RB1                                  | Missense            | 548  | Missense variant (K>N) codon            |
|      |       |                                  | 83% | chr17 | 7578406   | C    | T       | 4%   | 5%   | 40.06   | 2000 | 77                 | COSM99914  | TP53                                 | Missense pathogenic | 175  | Codon 175, Missense (R>H) - Pathogenic  |
|      |       |                                  | 83% | chr17 | 7579472   | G    | C       | 45%  | 54%  | 3521.77 | 792  | 357                | ---        | TP53                                 | Missense tolerated  | 72   | Codon 72, Missense (P/R) - Tolerated    |
| PF19 | 0.00% | Tubular Adenoma Distal Traverse  | 45% | chr2  | 212812097 | T    | C       | 54%  | 120% | 11512.3 | 1998 | 1082               | ---        | ERBB4                                | SNP                 |      | Intronic variant (33%)                  |
|      |       |                                  | 45% | chr4  | 1807894   | G    | A       | 100% | 222% | 15840.3 | 1001 | 1001               | ---        | FGFR3                                | SNP                 | 651  | Codon 651, Synonymous variant (4%)      |
|      |       |                                  | 45% | chr4  | 55141055  | A    | G       | 100% | 222% | 31642.9 | 1979 | 1979               | ---        | PDGFRA                               | SNP                 | 567  | Codon 567, Synonymous variant (4%)      |
|      |       |                                  | 45% | chr4  | 55962546  | -    | G       | 44%  | 99%  | 5481.9  | 1989 | 884                | ---        | KDR                                  | insertion           |      | Noncoding region, unknown               |
|      |       |                                  | 45% | chr4  | 55972974  | T    | A       | 48%  | 107% | 9541.46 | 1993 | 959                | ---        | KDR                                  | Missense tolerated  | 472  | Codon 472, Missense (Q>H) - Tolerated   |
|      |       |                                  | 45% | chr4  | 55980239  | C    | T       | 33%  | 74%  | 3970.61 | 1487 | 496                | ---        | KDR                                  | SNP                 |      | Intronic variant (48%)                  |
|      |       |                                  | 45% | chr5  | 112175770 | G    | A       | 47%  | 104% | 9165.54 | 2000 | 936                | ---        | APC                                  | SNP                 | 1493 | Synonymous, codon 1493                  |
|      |       |                                  | 45% | chr5  | 112175952 | -    | A       | 16%  | 36%  | 258.44  | 1966 | 315                | ---        | APC                                  | insertion           | 1554 | Insertion at codon 1554, effect unknown |
|      |       |                                  | 45% | chr5  | 149433596 | T    | G       | 100% | 222% | 8567.36 | 745  | 743                | ---        | CSF1R                                | SNP                 |      | Downstream gene variant                 |
|      |       |                                  | 45% | chr5  | 149433597 | G    | A       | 97%  | 215% | 11444.4 | 771  | 747                | ---        | CSF1R                                | SNP                 |      | Downstream gene variant                 |
|      |       |                                  | 45% | chr7  | 55249063  | G    | A       | 100% | 222% | 13146.8 | 828  | 828                | ---        | EGFR                                 | SNP                 |      | Intronic variant (42%)                  |
|      |       |                                  | 45% | chr10 | 43613843  | G    | T       | 49%  | 108% | 9714.32 | 1993 | 970                | ---        | RET                                  | SNP                 | 769  | Codon 769, Synonymous variant (28%)     |
|      |       |                                  | 45% | chr11 | 534242    | A    | G       | 50%  | 112% | 5350.6  | 1043 | 525                | COSM249860 | HRAS                                 | SNP                 | 27   | Codon 27, Synonymous variant (30%)      |
| 45%  | chr13 | 28610183                         | A   | G     | 100%      | 222% | 32024.8 | 1998 | 1998 | ---     | FLT3 | SNP                |            | Splice region variant (38%)          |                     |      |                                         |
| 45%  | chr17 | 7579472                          | G   | C     | 54%       | 120% | 2985.83 | 515  | 277  | ---     | TP53 | Missense tolerated | 72         | Codon 72, Missense (P/R) - Tolerated |                     |      |                                         |
| PF20 | 0.00% | Tubular Adenoma Cecum            | 78% | chr3  | 178917005 | A    | G       | 100% | 128% | 31491.3 | 1983 | 1983               | ---        | PIK3CA                               | SNP                 |      | Downstream gene variant (22%)           |
|      |       |                                  | 78% | chr4  | 1807894   | G    | A       | 100% | 128% | 16567.7 | 1038 | 1038               | ---        | FGFR3                                | SNP                 | 651  | Codon 651, Synonymous variant (4%)      |
|      |       |                                  | 78% | chr4  | 55141055  | A    | G       | 100% | 128% | 31589.5 | 1982 | 1982               | ---        | PDGFRA                               | SNP                 | 567  | Codon 567, Synonymous variant (4%)      |
|      |       |                                  | 78% | chr4  | 55973048  | G    | A       | 52%  | 66%  | 10610.8 | 1996 | 1030               | ---        | KDR                                  | SNP                 |      | Intronic variant                        |
|      |       |                                  | 78% | chr5  | 112175754 | TATT | -       | 13%  | 17%  | 387.04  | 1981 | 262                | COSM41618  | APC                                  | deletion pathogenic | 1488 | Truncation, codon 1488                  |
|      |       |                                  | 78% | chr5  | 149433596 | T    | G       | 100% | 128% | 9657.23 | 822  | 822                | ---        | CSF1R                                | SNP                 |      | Downstream gene variant                 |
|      |       |                                  | 78% | chr5  | 149433597 | G    | A       | 98%  | 126% | 12802.2 | 843  | 828                | ---        | CSF1R                                | SNP                 |      | Downstream gene variant                 |
|      |       |                                  | 78% | chr7  | 55249063  | G    | A       | 100% | 128% | 13941.8 | 877  | 877                | ---        | EGFR                                 | SNP                 |      | Intronic variant (42%)                  |
|      |       |                                  | 78% | chr10 | 43613843  | G    | T       | 50%  | 63%  | 9985.02 | 1993 | 987                | ---        | RET                                  | SNP                 | 769  | Codon 769, Synonymous variant (28%)     |
|      |       |                                  | 78% | chr11 | 534242    | A    | G       | 50%  | 65%  | 6769.56 | 1322 | 666                | COSM249860 | HRAS                                 | SNP                 | 27   | Codon 27, Synonymous variant (30%)      |
|      |       |                                  | 78% | chr13 | 28610183  | A    | G       | 100% | 128% | 31980.3 | 1998 | 1998               | ---        | FLT3                                 | SNP                 |      | Splice region variant (38%)             |
|      |       |                                  | 78% | chr17 | 7579472   | G    | C       | 97%  | 124% | 9948.04 | 671  | 649                | ---        | TP53                                 | Missense tolerated  | 72   | Codon 72, Missense (P/R) - Tolerated    |
|      |       |                                  | 78% | chr22 | 24143260  | C    | T       | 7%   | 9%   | 87.44   | 1627 | 115                | ---        | SMARCB1                              | SNP                 |      | Synonymous variant                      |
| PF21 | 4.80% | Tubular Adenoma Transverse Colon | 45% | chr2  | 29432625  | C    | A       | 32%  | 71%  | 2774.88 | 1116 | 357                | ---        | ALK                                  | SNP                 |      | Intronic variant (10%)                  |
|      |       |                                  | 45% | chr4  | 1807894   | G    | A       | 100% | 222% | 13453.1 | 852  | 852                | ---        | FGFR3                                | SNP                 | 651  | Codon 651, Synonymous variant (4%)      |
|      |       |                                  | 45% | chr4  | 55141055  | A    | G       | 100% | 222% | 31505.9 | 1979 | 1979               | ---        | PDGFRA                               | SNP                 | 567  | Codon 567, Synonymous variant (4%)      |
|      |       |                                  | 45% | chr4  | 55593481  | A    | G       | 52%  | 115% | 10716.4 | 2000 | 1034               | COSM21983  | KIT                                  | SNP                 |      | Synonymous variant (2.2%)               |
|      |       |                                  | 45% | chr5  | 112175770 | G    | A       | 99%  | 220% | 31295.9 | 1998 | 1978               | ---        | APC                                  | SNP                 | 1493 | Synonymous, codon 1493                  |

|      |        |                               |     |       |           |      |         |      |      |          |         |                      |            |                                                                        |                     |         |                                                                                     |
|------|--------|-------------------------------|-----|-------|-----------|------|---------|------|------|----------|---------|----------------------|------------|------------------------------------------------------------------------|---------------------|---------|-------------------------------------------------------------------------------------|
|      |        |                               | 45% | chr5  | 112175821 | C    | -       | 17%  | 38%  | 775.94   | 1986    | 342                  | ---        | APC                                                                    | deletion pathogenic | 1510    | Truncation, codon 1510                                                              |
|      |        |                               | 45% | chr10 | 43613843  | G    | T       | 51%  | 114% | 10577.3  | 1994    | 1025                 | ---        | RET                                                                    | SNP                 | 769     | Codon 769, Synonymous variant (28%)                                                 |
|      |        |                               | 45% | chr11 | 534242    | A    | G       | 48%  | 108% | 4688.22  | 975     | 472                  | COSM249860 | HRAS                                                                   | SNP                 | 27      | Codon 27, Synonymous variant (30%)                                                  |
|      |        |                               | 45% | chr13 | 28610183  | A    | G       | 100% | 222% | 32063    | 1999    | 1999                 | ---        | FLT3                                                                   | SNP                 |         | Splice region variant (38%)                                                         |
|      |        |                               | 45% | chr17 | 7579472   | G    | C       | 60%  | 133% | 3113.73  | 459     | 275                  | ---        | TP53                                                                   | Missense tolerated  | 72      | Codon 72, Missense (P/R) - Tolerated                                                |
|      |        |                               | 45% | chr19 | 1220321   | T    | C       | 47%  | 105% | 2860.65  | 622     | 293                  | ---        | STK11                                                                  | SNP                 |         | Intronic variant (35%)                                                              |
|      |        |                               | 45% | chr19 | 1223125   | C    | G       | 52%  | 116% | 6077.35  | 1126    | 587                  | COSM21360  | STK11                                                                  | Missense pathogenic | 110/354 | Missense variant (phe>leu) reported to be associated with Peutz-Jeghers syndrome    |
| PF22 | 22.00% | Tubulovillous Adenoma         | 83% | chr2  | 212812097 | T    | C       | 57%  | 68%  | 7251.47  | 1178    | 667                  | ---        | ERBB4                                                                  | SNP                 |         | Intronic variant (33%)                                                              |
|      |        |                               | 83% | chr4  | 1807894   | G    | A       | 100% | 120% | 17489    | 1102    | 1102                 | ---        | FGFR3                                                                  | SNP                 | 651     | Codon 651, Synonymous variant (4%)                                                  |
|      |        |                               | 83% | chr4  | 55141055  | A    | G       | 100% | 120% | 31829.6  | 1987    | 1987                 | ---        | PDGFRA                                                                 | SNP                 | 567     | Codon 567, Synonymous variant (4%)                                                  |
|      |        |                               | 83% | chr4  | 55972974  | T    | A       | 48%  | 57%  | 9413.89  | 1998    | 952                  | ---        | KDR                                                                    | Missense tolerated  | 472     | Codon 472, Missense (Q>H) - Tolerated                                               |
|      |        |                               | 83% | chr5  | 112175247 | C    | -       | 31%  | 37%  | 1887.78  | 1337    | 416                  | COSM18700  | APC                                                                    | Deletion pathogenic | 1319    | Truncation, codon 1319                                                              |
|      |        |                               | 83% | chr5  | 112175247 | C    | -       | 31%  | 37%  | 1887.78  | 1337    | 416                  | COSM32201  | APC                                                                    | Deletion pathogenic | 1319    | Truncation, codon 1319                                                              |
|      |        |                               | 83% | chr5  | 112175770 | G    | A       | 49%  | 59%  | 9920.58  | 1998    | 984                  | ---        | APC                                                                    | SNP                 | 1439    | Synonymous, codon 1493                                                              |
|      |        |                               | 83% | chr5  | 149433596 | T    | G       | 100% | 120% | 9848.81  | 857     | 857                  | ---        | CSF1R                                                                  | SNP                 |         | Downstream gene variant                                                             |
|      |        |                               | 83% | chr5  | 149433597 | G    | A       | 99%  | 119% | 13347.4  | 872     | 859                  | ---        | CSF1R                                                                  | SNP                 |         | Downstream gene variant                                                             |
|      |        |                               | 83% | chr10 | 43613843  | G    | T       | 50%  | 60%  | 10096.1  | 1993    | 994                  | ---        | RET                                                                    | SNP                 | 769     | Codon 769, Synonymous variant (28%)                                                 |
|      |        |                               | 83% | chr10 | 43615633  | C    | G       | 51%  | 62%  | 10207.8  | 1939    | 992                  | ---        | RET                                                                    | SNP                 | 904     | Codon 904, Synonymous variant (16%)                                                 |
|      |        |                               | 83% | chr13 | 28610183  | A    | G       | 100% | 120% | 31893.1  | 1994    | 1994                 | ---        | FLT3                                                                   | SNP                 |         | Splice region variant (38%)                                                         |
|      |        |                               | 83% | chr17 | 7579472   | G    | C       | 50%  | 60%  | 3093.87  | 591     | 296                  | ---        | TP53                                                                   | Missense tolerated  | 72      | Codon 72, Missense (P/R) - Tolerated                                                |
|      |        |                               | 83% | chr18 | 48586344  | C    | T       | 100% | 120% | 31922.8  | 1993    | 1993                 | ---        | SMAD4                                                                  | SNP                 |         | Intronic variant (5%)                                                               |
| 83%  | chr22  | 24176287                      | G   | A     | 48%       | 58%  | 4709.92 | 980  | 474  | COSM1090 | SMARCB1 | SNP                  |            | Intronic variant (11%)                                                 |                     |         |                                                                                     |
| 83%  | chr22  | 24176330                      | G   | A     | 35%       | 43%  | 2814.09 | 950  | 337  | ---      | SMARCB1 | Missense deleterious |            | Missense variant (R>Q), predicted to be deleterious (tumor suppressor) |                     |         |                                                                                     |
| PF23 | 35.20% | Tubular Adenoma Sigmoid Colon | 65% | chr2  | 212578395 | G    | A       | 3%   | 5%   | 17.62    | 1983    | 64                   | ---        | ERBB4                                                                  | SNP                 |         | Intronic variant                                                                    |
|      |        |                               | 65% | chr3  | 178917005 | A    | G       | 52%  | 80%  | 7331.12  | 1375    | 711                  | ---        | PIK3CA                                                                 | SNP                 |         | Downstream gene variant (22%)                                                       |
|      |        |                               | 65% | chr4  | 1807894   | G    | A       | 100% | 154% | 22249.8  | 1401    | 1401                 | ---        | FGFR3                                                                  | SNP                 | 651     | Codon 651, Synonymous variant (4%)                                                  |
|      |        |                               | 65% | chr4  | 55141055  | A    | G       | 100% | 154% | 31527.7  | 1975    | 1975                 | ---        | PDGFRA                                                                 | SNP                 | 567     | Codon 567, Synonymous variant (4%)                                                  |
|      |        |                               | 65% | chr4  | 55946171  | G    | A       | 53%  | 81%  | 6928.87  | 1265    | 666                  | ---        | KDR                                                                    | SNP                 | 1336    | Synonymous variant (1.5%) codon 1336                                                |
|      |        |                               | 65% | chr4  | 55972974  | T    | A       | 49%  | 75%  | 9812.31  | 1997    | 977                  | ---        | KDR                                                                    | Missense tolerated  | 472     | Codon 472, Missense (Q>H) - Tolerated                                               |
|      |        |                               | 65% | chr4  | 55980239  | C    | T       | 99%  | 152% | 11454.9  | 735     | 727                  | ---        | KDR                                                                    | SNP                 |         | Intronic variant (48%)                                                              |
|      |        |                               | 65% | chr5  | 112175147 | G    | T       | 23%  | 35%  | 2465.03  | 1713    | 394                  | ---        | APC                                                                    | Nonsense pathogenic | 1286    | Truncation codon 1286, (E>stop)                                                     |
|      |        |                               | 65% | chr5  | 149433596 | T    | G       | 100% | 154% | 12104.1  | 1059    | 1059                 | ---        | CSF1R                                                                  | SNP                 |         | Downstream gene variant                                                             |
|      |        |                               | 65% | chr5  | 149433597 | G    | A       | 97%  | 149% | 16314    | 1087    | 1056                 | ---        | CSF1R                                                                  | SNP                 |         | Downstream gene variant                                                             |
|      |        |                               | 65% | chr7  | 55249063  | G    | A       | 100% | 154% | 17121.4  | 1080    | 1079                 | ---        | EGFR                                                                   | SNP                 |         | Intronic variant (42%)                                                              |
|      |        |                               | 65% | chr10 | 43613843  | G    | T       | 50%  | 77%  | 10143.8  | 1995    | 998                  | ---        | RET                                                                    | SNP                 | 769     | Codon 769, Synonymous variant (28%)                                                 |
|      |        |                               | 65% | chr11 | 534242    | A    | G       | 50%  | 77%  | 9801.53  | 1940    | 967                  | COSM249860 | HRAS                                                                   | SNP                 | 27      | Codon 27, Synonymous variant (30%)                                                  |
| 65%  | chr13  | 28610183                      | A   | G     | 100%      | 154% | 32008.9 | 1997 | 1997 | ---      | FLT3    | SNP                  |            | Splice region variant (38%)                                            |                     |         |                                                                                     |
| 65%  | chr17  | 7579472                       | G   | C     | 61%       | 94%  | 5186.55 | 734  | 450  | ---      | TP53    | Missense tolerated   | 72         | Codon 72, Missense (P/R) - Tolerated                                   |                     |         |                                                                                     |
| PF24 | 31.90% | Tubulovillous Adenoma Sigmoid | 28% | chr1  | 43815035  | C    | T       | 50%  | 180% | 6811.53  | 1326    | 669                  | ---        | MPL                                                                    | Missense pathogenic | 524     | Missense variant (arg>cys), codon 524, mH3K27Ac mark, conflicting predicted effects |

|      |        |                                 |     |       |           |      |   |      |      |         |      |      |            |        |                     |      |                                       |
|------|--------|---------------------------------|-----|-------|-----------|------|---|------|------|---------|------|------|------------|--------|---------------------|------|---------------------------------------|
|      |        | Colon                           | 28% | chr4  | 1807894   | G    | A | 100% | 357% | 18168.1 | 1147 | 1147 | ---        | FGFR3  | SNP                 | 651  | Codon 651, Synonymous variant (4%)    |
|      |        |                                 | 28% | chr4  | 55141055  | A    | G | 100% | 357% | 31680.2 | 1983 | 1983 | ---        | PDGFRA | SNP                 | 657  | Codon 567, Synonymous variant (4%)    |
|      |        |                                 | 28% | chr4  | 55962546  | -    | G | 44%  | 158% | 5410.91 | 1985 | 877  | ---        | KDR    | insertion unknown   |      | Noncoding region, unknown             |
|      |        |                                 | 28% | chr4  | 55972974  | T    | A | 48%  | 171% | 9517.14 | 1996 | 958  | ---        | KDR    | Missense tolerated  | 472  | Codon 472, Missense (Q>H) - Tolerated |
|      |        |                                 | 28% | chr4  | 55980239  | C    | T | 26%  | 92%  | 1969.42 | 1135 | 291  | ---        | KDR    | SNP                 |      | Intronic variant (48%)                |
|      |        |                                 | 28% | chr5  | 112175677 | GAGA | - | 24%  | 86%  | 1618.88 | 1932 | 466  | COSM19694  | APC    | Deletion pathogenic | 1462 | Truncation codon 1462                 |
|      |        |                                 | 28% | chr5  | 112175679 | GAGA | - | 24%  | 86%  | 1618.88 | 1932 | 466  | COSM41622  | APC    | Deletion pathogenic | 1462 | Truncation codon 1,462                |
|      |        |                                 | 28% | chr5  | 112175682 | AGAG | - | 24%  | 86%  | 1618.88 | 1932 | 466  | COSM18838  | APC    | Deletion pathogenic | 1462 | Truncation codon 1,462                |
|      |        |                                 | 28% | chr5  | 112175770 | G    | A | 100% | 357% | 31449   | 1983 | 1983 | ---        | APC    | SNP                 | 1493 | Synonymous, codon 1493                |
|      |        |                                 | 28% | chr5  | 149433596 | T    | G | 100% | 356% | 8629.36 | 1278 | 1275 | ---        | CSF1R  | SNP                 |      | Downstream gene variant               |
|      |        |                                 | 28% | chr5  | 149433597 | G    | A | 98%  | 350% | 21353   | 1397 | 1368 | ---        | CSF1R  | SNP                 |      | Downstream gene variant               |
|      |        |                                 | 28% | chr10 | 43613843  | G    | T | 50%  | 179% | 10136.9 | 1994 | 997  | ---        | RET    | SNP                 | 769  | Codon 769, Synonymous variant (28%)   |
|      |        |                                 | 28% | chr10 | 43615633  | C    | G | 50%  | 179% | 10207.9 | 1995 | 1002 | ---        | RET    | SNP                 | 904  | Codon 904, Synonymous variant (16%)   |
|      |        |                                 | 28% | chr11 | 534242    | A    | G | 50%  | 177% | 7799.2  | 1564 | 775  | COSM249860 | HRAS   | SNP                 | 27   | Codon 27, Synonymous variant (30%)    |
|      |        |                                 | 28% | chr12 | 25398284  | C    | T | 3%   | 12%  | 18.78   | 1995 | 65   | COSM521    | KRAS   | Missense            | 12   | missense variant, (G>D) codon         |
|      |        |                                 | 28% | chr13 | 28610183  | A    | G | 100% | 357% | 31778.3 | 1991 | 1991 | ---        | FLT3   | SNP                 |      | Splice region variant (38%)           |
|      |        |                                 | 28% | chr17 | 7579472   | G    | C | 97%  | 345% | 12388.8 | 832  | 804  | ---        | TP53   | Missense tolerated  | 72   | Codon 72, Missense (P>R) - Tolerated  |
| PF25 | 40.30% | Tubular Adenoma Ascending Colon | 30% | chr2  | 212812097 | T    | C | 53%  | 178% | 11226.9 | 1999 | 1065 | ---        | ERBB4  | SNP                 |      | Intronic variant (33%)                |
|      |        |                                 | 30% | chr3  | 178917005 | A    | G | 99%  | 330% | 31224.6 | 1998 | 1976 | ---        | PIK3CA | SNP                 |      | Downstream gene variant (22%)         |
|      |        |                                 | 30% | chr3  | 178927410 | A    | G | 55%  | 184% | 11874.4 | 2000 | 1104 | ---        | PIK3CA | Missense tolerated  | 391  | Codon 391, Missense (I>M) - Tolerated |
|      |        |                                 | 30% | chr4  | 1807894   | G    | A | 100% | 333% | 16946.7 | 1068 | 1068 | ---        | FGFR3  | SNP                 | 651  | Codon 651, Synonymous variant (4%)    |
|      |        |                                 | 30% | chr4  | 55141055  | A    | G | 100% | 333% | 31759.8 | 1986 | 1986 | ---        | PDGFRA | SNP                 | 567  | Codon 567, Synonymous variant (4%)    |
|      |        |                                 | 30% | chr4  | 55962546  | -    | G | 45%  | 150% | 5605.1  | 1991 | 896  | ---        | KDR    | insertion unknown   |      | Noncoding region, unknown             |
|      |        |                                 | 30% | chr4  | 55972974  | T    | A | 50%  | 166% | 10094   | 1992 | 994  | ---        | KDR    | Missense tolerated  | 472  | Codon 472, Missense (Q>H) - Tolerated |
|      |        |                                 | 30% | chr4  | 55980239  | C    | T | 30%  | 101% | 3495.64 | 1530 | 464  | ---        | KDR    | SNP                 |      | Intronic variant (48%)                |
|      |        |                                 | 30% | chr5  | 112173917 | C    | T | 18%  | 58%  | 1792.85 | 1999 | 350  | COSM18852  | APC    | Nonsense pathogenic | 876  | Truncation, codon 876, (R>stop)       |
|      |        |                                 | 30% | chr5  | 112175639 | C    | T | 17%  | 55%  | 1629.62 | 1998 | 332  | COSM13127  | APC    | Nonsense pathogenic | 1450 | Truncation, Codon 1450 (R>stop)       |
|      |        |                                 | 30% | chr5  | 149433597 | G    | A | 26%  | 85%  | 3075.71 | 1782 | 456  | ---        | CSF1R  | SNP                 |      | Downstream gene variant               |
|      |        |                                 | 30% | chr7  | 55249063  | G    | A | 46%  | 152% | 3950.15 | 903  | 413  | ---        | EGFR   | SNP                 |      | Intronic variant (42%)                |
|      |        |                                 | 30% | chr13 | 28610183  | A    | G | 56%  | 187% | 12131.4 | 1999 | 1119 | ---        | FLT3   | SNP                 |      | Splice region variant (38%)           |
|      |        |                                 | 30% | chr17 | 7579472   | G    | C | 62%  | 205% | 4240.01 | 601  | 370  | ---        | TP53   | Missense tolerated  | 72   | Codon 72, Missense (P/R) - Tolerated  |
|      |        |                                 | 30% | chr19 | 1220321   | T    | C | 100% | 333% | 10189.4 | 648  | 648  | ---        | STK11  | SNP                 |      | Intronic variant (35%)                |
| PF26 | 42.30% | Tubular Adenoma Rectum          | 83% | chr2  | 212812097 | T    | C | 50%  | 60%  | 10222.4 | 1998 | 1003 | ---        | ERBB4  | SNP                 |      | Intronic variant (33%)                |
|      |        |                                 | 83% | chr4  | 1807894   | G    | A | 100% | 120% | 17163.1 | 1075 | 1075 | ---        | FGFR3  | SNP                 | 651  | Codon 651, Synonymous variant (4%)    |
|      |        |                                 | 83% | chr4  | 55141055  | A    | G | 100% | 120% | 31495.5 | 1974 | 1974 | ---        | PDGFRA | SNP                 | 567  | Codon 567, Synonymous variant (4%)    |
|      |        |                                 | 83% | chr4  | 55152040  | C    | T | 98%  | 118% | 30764.7 | 1998 | 1963 | COSM22413  | PDGFRA | SNP                 | 584  | Codon 584, Synonymous variant (21%)   |
|      |        |                                 | 83% | chr4  | 55593464  | A    | C | 51%  | 62%  | 10524.6 | 1999 | 1022 | COSM28026  | KIT    | Missense tolerated  | 541  | Codon 541, Missense (M>L) - Tolerated |
|      |        |                                 | 83% | chr4  | 55972974  | T    | A | 48%  | 58%  | 9593.12 | 1991 | 962  | ---        | KDR    | Missense tolerated  | 472  | Codon 472, Missense (Q>H) - Tolerated |
|      |        |                                 | 83% | chr4  | 55980239  | C    | T | 100% | 120% | 14041   | 885  | 885  | ---        | KDR    | SNP                 |      | Intronic variant (48%)                |
|      |        |                                 | 83% | chr5  | 112175770 | G    | A | 99%  | 119% | 31011   | 2000 | 1971 | ---        | APC    | SNP                 | 1493 | Synonymous, codon 1493                |
|      |        |                                 | 83% | chr5  | 149433597 | G    | A | 26%  | 31%  | 2530.72 | 1441 | 372  | ---        | CSF1R  | SNP                 |      | Downstream gene variant               |



|                                                                                                                                                                                                                                                                                                                       |       |          |   |   |      |      |         |      |      |            |         |                    |     |                                              |
|-----------------------------------------------------------------------------------------------------------------------------------------------------------------------------------------------------------------------------------------------------------------------------------------------------------------------|-------|----------|---|---|------|------|---------|------|------|------------|---------|--------------------|-----|----------------------------------------------|
| 83%                                                                                                                                                                                                                                                                                                                   | chr7  | 55249063 | G | A | 52%  | 63%  | 5183.54 | 949  | 496  | ---        | EGFR    | SNP                |     | Intronic variant (42%)                       |
| 83%                                                                                                                                                                                                                                                                                                                   | chr10 | 43613843 | G | T | 100% | 120% | 31878.5 | 1990 | 1990 | ---        | RET     | SNP                | 769 | Codon 769, Synonymous variant (28%)          |
| 83%                                                                                                                                                                                                                                                                                                                   | chr10 | 43615633 | C | G | 100% | 120% | 28928.4 | 1813 | 1813 | ---        | RET     | SNP                | 904 | Codon 904, Synonymous variant (16%)          |
| 83%                                                                                                                                                                                                                                                                                                                   | chr11 | 534242   | A | G | 46%  | 56%  | 5668.55 | 1265 | 586  | COSM249860 | HRAS    | SNP                | 27  | Codon 27, Synonymous variant (30%)           |
| 83%                                                                                                                                                                                                                                                                                                                   | chr13 | 28610183 | A | G | 100% | 120% | 31982.6 | 1997 | 1997 | ---        | FLT3    | SNP                |     | Splice region variant (38%)                  |
| 83%                                                                                                                                                                                                                                                                                                                   | chr17 | 7579472  | G | C | 95%  | 115% | 8978.33 | 623  | 594  | ---        | TP53    | Missense tolerated | 72  | Codon 72, Missense (P/R) - Tolerated         |
| 83%                                                                                                                                                                                                                                                                                                                   | chr17 | 7579473  | G | C | 4%   | 4%   | 13.84   | 622  | 22   | ---        | TP53    | Missense tolerated | 72  | Codon 72, Missense variant (P>A) - Tolerated |
| 83%                                                                                                                                                                                                                                                                                                                   | chr19 | 1220321  | T | C | 46%  | 56%  | 2880.82 | 655  | 302  | ---        | STK11   | SNP                |     | Intronic variant (35%)                       |
| 83%                                                                                                                                                                                                                                                                                                                   | chr22 | 24143260 | C | T | 6%   | 8%   | 69.45   | 1324 | 86   | ---        | SMARCB1 | SNP                |     | Synonymous variant                           |
| <p><b>All variants post quality control processing.</b> Variants were eliminated based on the following: (1) quality score less than 10, (2) allelic frequency less than 5% or number of allele reads less than 10, (3) a known mispriming event for this panel [PMID:25017478], or (4) strand bias was recorded.</p> |       |          |   |   |      |      |         |      |      |            |         |                    |     |                                              |
| <p>Samples that failed to amplify due to insufficient DNA: 02, 09, 10, and 16</p>                                                                                                                                                                                                                                     |       |          |   |   |      |      |         |      |      |            |         |                    |     |                                              |

| Sample | Volume Change/year | Pathology              | Sample Notes | Tumor Cellularity Estimate | Chromosome | Position  | Ref   | Variant | Allelic Frequency | Adjusted Allelic Frequency | Quality  | Original Coverage | Allele Coverage (# allele reads) | Allele.Name           | Gene.ID                                       | Codon | Variant Call   | Consequence and Notes                                         |
|--------|--------------------|------------------------|--------------|----------------------------|------------|-----------|-------|---------|-------------------|----------------------------|----------|-------------------|----------------------------------|-----------------------|-----------------------------------------------|-------|----------------|---------------------------------------------------------------|
| PF239  | -39%               | Hyperplastic           |              | 13%                        | chr2       | 212812097 | T     | C       | 45%               | 344%                       | 405.69   | 94                | 42                               | ---                   | ERBB4                                         | ?     | SNP            | Intronic variant (33%)                                        |
|        |                    |                        |              | 13%                        | chr4       | 1807894   | G     | A       | 100%              | 769%                       | 8216.08  | 508               | 518                              | ---                   | FGFR3                                         | 651   | SNP            | Synonymous variant (4%)                                       |
|        |                    |                        |              | 13%                        | chr4       | 55141055  | A     | G       | 100%              | 769%                       | 4454.32  | 248               | 251                              | ---                   | PDGFRA                                        | 567   | SNP            | Synonymous variant (4%)                                       |
|        |                    |                        |              | 13%                        | chr4       | 55152040  | C     | T       | 53%               | 407%                       | 4401.12  | 661               | 351                              | COSM22413             | PDGFRA                                        | 824   | Silent         | p.V824V                                                       |
|        |                    |                        |              | 13%                        | chr4       | 55946354  | G     | T       | 50%               | 381%                       | 3700.63  | 738               | 366                              | ---                   | KDR                                           | ?     | SNP            | Intronic variant                                              |
|        |                    |                        |              | 13%                        | chr4       | 55972974  | T     | A       | 48%               | 368%                       | 1650.62  | 355               | 170                              | ---                   | KDR                                           | 472   | Missense       | Missense (Q>H) - Tolerated                                    |
|        |                    |                        |              | 13%                        | chr4       | 55980239  | C     | T       | 100%              | 769%                       | 2224.42  | 140               | 140                              | ---                   | KDR                                           | ?     | SNP            | Intronic variant (48%)                                        |
|        |                    |                        |              | 13%                        | chr5       | 112175770 | G     | A       | 100%              | 769%                       | 7220.15  | 404               | 408                              | ---                   | APC                                           | 1493  | SNP            | Synonymous variant                                            |
|        |                    |                        |              | 13%                        | chr7       | 55249063  | G     | A       | 100%              | 769%                       | 2320.52  | 152               | 152                              | ---                   | EGFR                                          | ?     | SNP            | Intronic variant (42%)                                        |
|        |                    |                        |              | 13%                        | chr7       | 140453136 | A     | T       | 7%                | 52%                        | 105.26   | 425               | 29                               | ---                   | BRAF                                          | 600   | Missense       | Missense (V>E) - Pathogenic                                   |
|        |                    |                        |              | 13%                        | chr10      | 43613843  | G     | T       | 100%              | 769%                       | 8290.31  | 523               | 523                              | ---                   | RET                                           | 769   | SNP            | Synonymous variant (28%)                                      |
|        |                    |                        |              | 13%                        | chr11      | 534242    | A     | G       | 49%               | 376%                       | 3834.62  | 648               | 318                              | COSM249860            | HRAS                                          | 27    | Silent         | p.H27H                                                        |
|        |                    |                        |              | 13%                        | chr13      | 28610183  | A     | G       | 54%               | 415%                       | 8155.84  | 1429              | 771                              | ---                   | FLT3                                          | ?     | SNP            | Splice region variant (38%)                                   |
|        |                    |                        |              | 13%                        | chr17      | 7579472   | G     | C       | 100%              | 769%                       | 4163.95  | 223               | 281                              | ---                   | TP53                                          | 72    | Missense       | Missense (P/R) - Tolerated                                    |
|        | 13%                | chr18                  | 48586344     | C                          | T          | 48%       | 372%  | 3595.95 | 743               | 361                        | ---      | SMAD4             | ?                                | SNP                   | Intronic variant (5%)                         |       |                |                                                               |
|        | 13%                | chr19                  | 1220321      | T                          | C          | 98%       | 752%  | 4833.4  | 316               | 314                        | ---      | STK11             | ?                                | SNP                   | Intronic variant (35%)                        |       |                |                                                               |
| PF241  | 14%                | Hyperplastic           |              | 60%                        | chr10      | 43613843  | G     | T       | 100%              | 167%                       | 130.46   | 12                | 12                               | ---                   | RET                                           | 769   | SNP            | Synonymous variant (28%)                                      |
|        |                    |                        |              | 60%                        | chr11      | 534242    | A     | G       | 75%               | 125%                       | 76.4     | 12                | 9                                | COSM249860            | HRAS                                          | 27    | Silent         | p.H27H                                                        |
|        |                    |                        |              | 60%                        | chr12      | 25398284  | C     | A       | 47%               | 79.00%                     | 70.25    | 18                | 9                                | ---                   | KRAS                                          | 12    | Missense       | Missense variant, (G>D) codon 12, predicted to be deleterious |
|        |                    |                        |              | 60%                        | chr12      | 25398284  | C     | A       | 45%               | 75%                        | 68.2     | 21                | 9                                | COSM520               | KRAS                                          | 12    | Missense       | p.G12V                                                        |
|        | 60%                | chr13                  | 28610183     | A                          | G          | 72%       | 120%  | 307.55  | 36                | 26                         | ---      | FLT3              | ?                                | SNP                   | Splice region variant (38%)                   |       |                |                                                               |
| PF245  | 67%                | Tubular Adenocarcinoma |              | 40%                        | chr2       | 209113192 | G     | A       | 53%               | 131%                       | 12169    | 1839              | 969                              | NOCOSMIC105           | IDH1                                          | 105   | SNP            | Synonymous variant (5%)                                       |
|        |                    |                        |              | 40%                        | chr2       | 212812097 | T     | C       | 48%               | 121%                       | 2123.47  | 439               | 213                              | ---                   | ERBB4                                         | ?     | SNP            | Intronic variant (33%)                                        |
|        |                    |                        |              | 40%                        | chr3       | 178917005 | A     | G       | 53%               | 132%                       | 2581.01  | 471               | 249                              | ---                   | PIK3CA                                        | ?     | SNP            | Downstream gene variant (22%)                                 |
|        |                    |                        |              | 40%                        | chr3       | 178952020 | C     | T       | 50%               | 126%                       | 5561.1   | 907               | 457                              | COSM21451             | PIK3CA                                        | 1025  | Silent         | p.T1025T                                                      |
|        |                    |                        |              | 40%                        | chr4       | 1807894   | G     | A       | 100%              | 250%                       | 6159.46  | 386               | 387                              | ---                   | FGFR3                                         | 651   | SNP            | Synonymous variant (4%)                                       |
|        |                    |                        |              | 40%                        | chr4       | 55141055  | A     | G       | 100%              | 250%                       | 7520.23  | 423               | 424                              | ---                   | PDGFRA                                        | 567   | SNP            | Synonymous variant (4%)                                       |
|        |                    |                        |              | 40%                        | chr4       | 55980239  | C     | T       | 32%               | 80%                        | 920.36   | 373               | 119                              | ---                   | KDR                                           | ?     | SNP            | Intronic variant (49%)                                        |
|        |                    |                        |              | 40%                        | chr5       | 112175212 | AAAAG | -       | 35%               | 89%                        | 1223.37  | 338               | 122                              | ---                   | APC                                           | 1307  | Missense       | Missense pathogenic, truncation                               |
|        |                    |                        |              | 40%                        | chr5       | 112175212 | AAAAG | -       | 35%               | 88%                        | 1245.53  | 348               | 122                              | COSM18764             | APC                                           | 1309  | Frameshift Del | p.E1309fs*4                                                   |
|        |                    |                        |              | 40%                        | chr5       | 112175213 | AAAGA | -       | 35%               | 88%                        | 1245.53  | 348               | 122                              | COSM19263             | APC                                           | 1309  | Frameshift Del | p.E1309fs*4                                                   |
|        |                    |                        |              | 40%                        | chr5       | 112175216 | GAAAA | -       | 35%               | 88%                        | 1245.53  | 348               | 122                              | COSM19145             | APC                                           | 1309  | Frameshift Del | p.E1309fs*4                                                   |
|        |                    |                        |              | 40%                        | chr5       | 112175217 | AAAAG | -       | 35%               | 88%                        | 1245.53  | 348               | 122                              | COSM18701             | APC                                           | 1309  | Frameshift Del | p.E1309fs*4                                                   |
|        |                    |                        |              | 40%                        | chr5       | 112175218 | AAAGA | -       | 35%               | 88%                        | 1245.53  | 348               | 122                              | COSM13113             | APC                                           | 1309  | Frameshift Del | p.E1309fs*4                                                   |
|        |                    |                        |              | 40%                        | chr5       | 112175770 | G     | A       | 100%              | 250%                       | 15659.5  | 865               | 864                              | ---                   | APC                                           | 1493  | SNP            | Synonymous                                                    |
|        |                    |                        |              | 40%                        | chr5       | 149433596 | TG    | GA      | 100%              | 250%                       | 3453.4   | 220               | 220                              | ---                   | CSF1R                                         | ?     | SNP            | Downstream gene variant                                       |
|        |                    |                        |              | 40%                        | chr7       | 55249063  | G     | A       | 33%               | 83%                        | 810.85   | 308               | 103                              | ---                   | EGFR                                          | ?     | SNP            | Intronic variant (42%)                                        |
|        |                    |                        |              | 40%                        | chr10      | 43613843  | G     | T       | 51%               | 128%                       | 2619.93  | 503               | 258                              | ---                   | RET                                           | 769   | SNP            | Synonymous variant (28%)                                      |
|        |                    |                        |              | 40%                        | chr10      | 43615633  | C     | G       | 58%               | 146%                       | 2457.7   | 381               | 223                              | ---                   | RET                                           | 904   | SNP            | Synonymous variant (16%)                                      |
|        |                    |                        |              | 40%                        | chr13      | 28602292  | T     | C       | 49%               | 123%                       | 5917.92  | 1196              | 588                              | ---                   | FLT3                                          | ?     | SNP            | Intronic variant (4%)                                         |
|        |                    |                        |              | 40%                        | chr13      | 28610183  | A     | G       | 100%              | 250%                       | 22911.5  | 1430              | 1432                             | ---                   | FLT3                                          | ?     | SNP            | Splice region variant (38%)                                   |
|        | 40%                | chr13                  | 49033829     | C                          | T          | 37%       | 92%   | 1252.51 | 394               | 146                        | ---      | RB1               | 656                              | Missense              | p.R656W SIFT = deleterious, PolyPhen = benign |       |                |                                                               |
|        | 40%                | chr17                  | 7579472      | G                          | C          | 46%       | 115%  | 2137.26 | 281               | 180                        | ---      | TP53              | 72                               | Missense              | Missense (P/R) - Tolerated                    |       |                |                                                               |
|        | 40%                | chr22                  | 24176287     | G                          | A          | 52%       | 131%  | 2449.35 | 375               | 196                        | COSM1090 | SMARCB1           | ?                                | Intronic Substitution | p.?                                           |       |                |                                                               |
| PF249  | -29%               | Tubular Adenocarcinoma |              | 30%                        | chr3       | 178917005 | A     | G       | 46%               | 154%                       | 1476.11  | 331               | 153                              | ---                   | PIK3CA                                        | ?     | SNP            | Downstream gene variant (22%)                                 |
|        |                    |                        |              | 30%                        | chr4       | 1807894   | G     | A       | 100%              | 333%                       | 4912.24  | 313               | 313                              | ---                   | FGFR3                                         | 651   | SNP            | Synonymous variant (4%)                                       |
|        |                    |                        |              | 30%                        | chr4       | 55141055  | A     | G       | 100%              | 333%                       | 6988.38  | 396               | 396                              | ---                   | PDGFRA                                        | 567   | SNP            | Synonymous variant (4%)                                       |
|        |                    |                        |              | 30%                        | chr4       | 55152040  | C     | T       | 52%               | 173%                       | 4104.5   | 639               | 332                              | COSM22413             | PDGFRA                                        | 824   | Silent         | p.V824V                                                       |
|        |                    |                        |              | 30%                        | chr4       | 55946171  | G     | A       | 58%               | 193%                       | 1009.23  | 164               | 95                               | ---                   | KDR                                           | 1336  | SNP            | Synonymous variant (1.5%)                                     |
|        |                    |                        |              | 30%                        | chr4       | 55962546  | -     | G       | 45%               | 148%                       | 1535.56  | 763               | 245                              | ---                   | KDR                                           | ?     | Insertion      | Noncoding region, unknown                                     |
|        |                    |                        |              | 30%                        | chr4       | 55972974  | T     | A       | 47%               | 156%                       | 2936.82  | 640               | 300                              | ---                   | KDR                                           | 472   | Missense       | Missense (Q>H) - Tolerated                                    |
|        |                    |                        |              | 30%                        | chr4       | 55980239  | C     | T       | 34%               | 114%                       | 1006.06  | 365               | 125                              | ---                   | KDR                                           | ?     | SNP            | Intronic variant (48%)                                        |
|        |                    |                        |              | 30%                        | chr5       | 112175212 | AAAAG | -       | 57%               | 189%                       | 2156.23  | 280               | 165                              | ---                   | APC                                           | 1307  | Missense       | Truncation                                                    |
|        |                    |                        |              | 30%                        | chr5       | 112175212 | AAAAG | -       | 57%               | 188%                       | 2161.97  | 297               | 165                              | COSM18764             | APC                                           | 1309  | Frameshift Del | p.E1309fs*4                                                   |
|        |                    |                        |              | 30%                        | chr5       | 112175213 | AAAGA | -       | 57%               | 188%                       | 2161.97  | 297               | 165                              | COSM19263             | APC                                           | 1309  | Frameshift Del | p.E1309fs*4                                                   |

|       |      |                |     |       |           |       |      |      |      |         |       |      |            |        |         |                |                                                |
|-------|------|----------------|-----|-------|-----------|-------|------|------|------|---------|-------|------|------------|--------|---------|----------------|------------------------------------------------|
|       |      |                | 30% | chr5  | 112175216 | GAAA  | -    | 57%  | 188% | 2161.97 | 297   | 165  | COSM19145  | APC    | 1309    | Frameshift Del | p.E1309fs*4                                    |
|       |      |                | 30% | chr5  | 112175217 | AAAAG | -    | 57%  | 188% | 2161.97 | 297   | 165  | COSM18701  | APC    | 1309    | Frameshift Del | p.E1309fs*4                                    |
|       |      |                | 30% | chr5  | 112175218 | AAAGA | -    | 57%  | 188% | 2161.97 | 297   | 165  | COSM13113  | APC    | 1309    | Frameshift Del | p.E1309fs*4                                    |
|       |      |                | 30% | chr5  | 112175770 | G     | A    | 25%  | 83%  | 1830.23 | 851   | 212  | ---        | APC    | 1493    | SNP            | Synonymous                                     |
|       |      |                | 30% | chr5  | 149433596 | TG    | GA   | 100% | 333% | 3101.87 | 194   | 194  | ---        | CSF1R  | ?       | SNP            | Downstream gene variant                        |
|       |      |                | 30% | chr7  | 116339672 | C     | T    | 52%  | 172% | 6190.73 | 1163  | 602  | ---        | MET    | 178     | Silent         | p.S178S COSM1579024                            |
|       |      |                | 30% | chr11 | 534242    | A     | G    | 53%  | 177% | 2705.85 | 395   | 212  | COSM249860 | HRAS   | 27      | Silent         | p.H27H                                         |
|       |      |                | 30% | chr13 | 28610183  | A     | G    | 61%  | 202% | 10527.5 | 1533  | 930  | ---        | FLT3   | ?       | SNP            | Splice region variant (38%)                    |
|       |      |                | 30% | chr17 | 7579472   | G     | C    | 90%  | 301% | 5883.46 | 389   | 352  | ---        | TP53   | 72      | Missense       | Missense (P/R) - Tolerated                     |
| PF250 | 147% | Tubulovillous  | 70% | chr3  | 178917005 | A     | G    | 44%  | 63%  | 1017.82 | 251   | 110  | ---        | PIK3CA | ?       | SNP            | Downstream gene variant (22%)                  |
|       |      |                | 70% | chr4  | 1807894   | G     | A    | 100% | 143% | 4205.37 | 268   | 269  | ---        | FGFR3  | 651     | SNP            | Synonymous variant (4%)                        |
|       |      |                | 70% | chr4  | 55141055  | A     | G    | 100% | 143% | 5244.73 | 297   | 299  | ---        | PDGFRA | 567     | SNP            | Synonymous variant (4%)                        |
|       |      |                | 70% | chr4  | 55152040  | C     | T    | 53%  | 76%  | 4036.17 | 595   | 317  | COSM22413  | PDGFRA | 824     | Silent         | p.V824V                                        |
|       |      |                | 70% | chr4  | 55946171  | G     | A    | 49%  | 70%  | 1098.26 | 225   | 111  | ---        | KDR    | 1336    | SNP            | Synonymous variant (1.5%)                      |
|       |      |                | 70% | chr4  | 55962546  | -     | G    | 45%  | 64%  | 1245.77 | 646   | 200  | ---        | KDR    | ?       | Insertion      | Noncoding region, unknown                      |
|       |      |                | 70% | chr4  | 55972974  | T     | A    | 50%  | 71%  | 2511.92 | 502   | 251  | ---        | KDR    | 472     | Missense       | Missense (Q>H) - Tolerated                     |
|       |      |                | 70% | chr5  | 112175427 | -     | AGAC | 79%  | 113% | 6327.07 | 525   | 417  | ---        | APC    | 1379    | Insertion      | p.E1379ETX effect unknown                      |
|       |      |                | 70% | chr5  | 112175770 | G     | A    | 92%  | 131% | 8939.38 | 575   | 530  | ---        | APC    | 1493    | SNP            | Synonymous                                     |
|       |      |                | 70% | chr5  | 149433596 | TG    | GA   | 100% | 143% | 2223.45 | 140   | 140  | ---        | CSF1R  | ?       | SNP            | Downstream gene variant                        |
|       |      |                | 70% | chr7  | 116339672 | C     | T    | 37%  | 52%  | 3939.09 | 1266  | 466  | ---        | MET    | 178     | Silent         | p.S178S COSM1579024                            |
|       |      |                | 70% | chr11 | 534242    | A     | G    | 42%  | 60%  | 1437.68 | 313   | 132  | COSM249860 | HRAS   | 27      | Silent         | p.H27H                                         |
|       |      |                | 70% | chr12 | 25398281  | C     | T    | 24%  | 34%  | 1807.87 | 867   | 212  | ---        | KRAS   | 13      | missense       | p.G13D COSM532 pathogenic                      |
|       |      |                | 70% | chr12 | 25398281  | C     | T    | 24%  | 34%  | 1808.7  | 886   | 212  | COSM532    | KRAS   | 13      | Missense       | p.G13D pathogenic                              |
|       |      |                | 70% | chr13 | 28610183  | A     | G    | 55%  | 78%  | 5833.44 | 996   | 545  | ---        | FLT3   | ?       | SNP            | Splice region variant (38%)                    |
|       |      |                | 70% | chr17 | 7579472   | G     | C    | 100% | 143% | 5550.38 | 305   | 310  | ---        | TP53   | 72      | Missense       | Missense (P/R) - Tolerated                     |
| PF252 | -27% | Jubular Adenon | 20% | chr4  | 1807894   | G     | A    | 100% | 500% | 101.91  | 10    | 10   | ---        | FGFR3  | 769     | SNP            | Synonymous variant (28%)                       |
|       |      |                | 20% | chr4  | 55961036  | A     | G    | 49%  | 243% | 2206.95 | 461   | 224  | ---        | KDR    | 968     | SNP            | p.S968S                                        |
|       |      |                | 20% | chr11 | 534242    | A     | G    | 67%  | 334% | 85.04   | 15    | 10   | COSM249860 | HRAS   | 27      | Silent         | p.H27H                                         |
|       |      |                | 20% | chr13 | 28602292  | T     | C    | 52%  | 261% | 102.51  | 22    | 12   | ---        | FLT3   | ?       | SNP            | Intronic variant (4%)                          |
|       |      |                | 20% | chr13 | 28610183  | A     | G    | 91%  | 455% | 403.14  | 33    | 30   | ---        | FLT3   | ?       | SNP            | Splice region variant (38%)                    |
| PF254 | 21%  | Jubular Adenon | 15% | chr2  | 209113154 | G     | A    | 7%   | 45%  | 64.78   | 480   | 32   | ---        | IDH1   | 118     | Missense       | p.P118L, conflicting predicted results         |
|       |      |                | 15% | chr4  | 1807871   | A     | G    | 7%   | 45%  | 104.4   | 774   | 53   | ---        | FGFR3  | 532/644 | Missense       | p.N532/644D                                    |
|       |      |                | 15% | chr4  | 1807894   | G     | A    | 100% | 667% | 13537.5 | 843   | 852  | ---        | FGFR3  | 651     | SNP            | Synonymous variant (4%)                        |
|       |      |                | 15% | chr4  | 55141055  | A     | G    | 100% | 667% | 1785.55 | 108   | 108  | ---        | PDGFRA | 567     | SNP            | Synonymous variant (4%)                        |
|       |      |                | 15% | chr4  | 55593481  | A     | G    | 52%  | 343% | 5682.34 | 881   | 455  | COSM21983  | KIT    | 546     | Silent         | p.K546K                                        |
|       |      |                | 15% | chr4  | 55980239  | C     | T    | 26%  | 175% | 154.21  | 84    | 22   | ---        | KDR    | ?       | SNP            | Intronic variant (48%)                         |
|       |      |                | 15% | chr4  | 153247358 | T     | C    | 6%   | 38%  | 152.18  | 2222  | 114  | ---        | FBXW7  | 482     | Missense       | p.T482A, deleterious by both SIFT and PolyPhen |
|       |      |                | 15% | chr5  | 112175770 | G     | A    | 57%  | 379% | 842.34  | 123   | 70   | ---        | APC    | 1493    | SNP            | Synonymous variant                             |
|       |      |                | 15% | chr5  | 149433596 | TG    | GA   | 99%  | 661% | 2065.07 | 133   | 132  | ---        | CSF1R  | ?       | SNP            | Downstream gene variant                        |
|       |      |                | 15% | chr7  | 55221893  | C     | T    | 9%   | 57%  | 58.05   | 221   | 19   | ---        | EGFR   | ?       | SNP            | intronic variant, rs374526327                  |
|       |      |                | 15% | chr7  | 55249063  | G     | A    | 99%  | 659% | 1381.47 | 88    | 89   | ---        | EGFR   | ?       | SNP            | Intronic variant (42%)                         |
|       |      |                | 15% | chr7  | 55249174  | A     | G    | 6%   | 39%  | 33.24   | 289   | 17   | ---        | EGFR   | ?       | SNP            | intronic variant rs191420937                   |
|       |      |                | 15% | chr7  | 116339673 | G     | A    | 5%   | 36%  | 126.48  | 3031  | 107  | ---        | MET    | 179     | Missense       | p.A179T, predicted to be benign                |
|       |      |                | 15% | chr9  | 139399341 | T     | A    | 7%   | 48%  | 39.9    | 208   | 15   | ---        | NOTCH1 | 1601    | Missense       | p.H1601L, predicted to be benign               |
|       |      |                | 15% | chr10 | 43613843  | G     | T    | 100% | 667% | 7372.27 | 463   | 466  | ---        | RET    | 769     | SNP            | Synonymous variant (28%)                       |
|       |      |                | 15% | chr11 | 534242    | A     | G    | 52%  | 347% | 8995.17 | 1374  | 717  | COSM249860 | HRAS   | 27      | Silent         | p.H27H                                         |
|       |      |                | 15% | chr16 | 68835637  | A     | G    | 8%   | 51%  | 328.8   | 4201  | 153  | ---        | CDH1   | 76      | Silent         | p.K76K                                         |
|       |      |                | 15% | chr17 | 7579419   | AG    | GA   | 17%  | 116% | 42.31   | 59    | 12   | ---        | TP53   | 90      | frameshift     | p.S?90F?                                       |
|       |      |                | 15% | chr17 | 7579472   | G     | C    | 91%  | 609% | 1407.89 | 90    | 84   | ---        | TP53   | 72      | Missense       | Missense (P/R) - Tolerated                     |
|       |      |                | 15% | chr19 | 1220321   | T     | C    | 52%  | 345% | 562.11  | 111   | 58   | ---        | STK11  | ?       | SNP            | Intronic variant (35%)                         |
| PF255 | 17%  | Hyperplastic   | 25% | chr4  | 1807894   | G     | A    | 100% | 400% | 31897.3 | 5770  | 1993 | ---        | FGFR3  | 651     | SNP            | Synonymous variant (4%)                        |
|       |      |                | 25% | chr4  | 55141055  | A     | G    | 100% | 400% | 33989.7 | 1847  | 1870 | ---        | PDGFRA | 567     | SNP            | Synonymous variant (4%)                        |
|       |      |                | 25% | chr4  | 55593481  | A     | G    | 52%  | 209% | 13118.9 | 10140 | 1042 | COSM21983  | KIT    | 546     | Silent         | p.K546K                                        |
|       |      |                | 25% | chr4  | 55980239  | C     | T    | 39%  | 156% | 3711.04 | 1083  | 422  | ---        | KDR    | ?       | SNP            | Intronic variant (48%)                         |
|       |      |                | 25% | chr5  | 112175770 | G     | A    | 42%  | 170% | 9648.67 | 4103  | 847  | ---        | APC    | 1493    | SNP            | Synonymous, codon 1493                         |
|       |      |                | 25% | chr5  | 149433596 | TG    | GA   | 100% | 400% | 22300.8 | 1393  | 1394 | ---        | CSF1R  | ?       | SNP            | Downstream gene variant                        |
|       |      |                | 25% | chr7  | 55249063  | G     | A    | 100% | 400% | 24983.7 | 1570  | 1569 | ---        | EGFR   | ?       | SNP            | Intronic variant (42%)                         |
|       |      |                | 25% | chr7  | 140453136 | A     | T    | 33%  | 131% | 6550.8  | 2732  | 653  | COSM476    | BRAF   | 600     | Missense       | p.V600E                                        |
|       |      |                | 25% | chr9  | 139390805 | G     | -    | 100% | 400% | 32000.6 | 1992  | 1848 | COSM13070  | NOTCH1 | 2463    | Frameshift Del | p.A2463fs*14                                   |
|       |      |                | 25% | chr10 | 43613843  | G     | T    | 100% | 400% | 31999.7 | 10787 | 1995 | ---        | RET    | 769     | SNP            | Synonymous variant (28%)                       |

|       |       |                |     |       |           |       |         |      |      |          |         |      |                       |                             |         |                |                                 |
|-------|-------|----------------|-----|-------|-----------|-------|---------|------|------|----------|---------|------|-----------------------|-----------------------------|---------|----------------|---------------------------------|
|       |       |                | 25% | chr11 | 534242    | A     | G       | 58%  | 234% | 15505.3  | 7077    | 1167 | COSM249860            | HRAS                        | 27      | Silent         | p.H27H                          |
|       |       |                | 25% | chr17 | 7579472   | G     | C       | 100% | 400% | 30827    | 1769    | 1741 | ---                   | TP53                        | 72      | Missense       | Missense (P/R) - Tolerated      |
|       |       |                | 25% | chr19 | 1220321   | T     | C       | 57%  | 229% | 12462    | 2336    | 1137 | ---                   | STK11                       | ?       | SNP            | Intronic variant (35%)          |
| PF256 | 95%   | Tubulovillous  | 50% | chr2  | 209113192 | G     | A       | 52%  | 105% | 5245.68  | 793     | 416  | NOCOSMIC105           | IDH1                        | 105     | SNP            | Synonymous variant (5%)         |
|       |       |                | 50% | chr4  | 1807894   | G     | A       | 100% | 200% | 3262.55  | 212     | 211  | ---                   | FGFR3                       | 769     | SNP            | Synonymous variant (28%)        |
|       |       |                | 50% | chr4  | 55141013  | G     | A       | 39%  | 77%  | 824.97   | 194     | 75   | ---                   | PDGFRA                      | 553     | Silent         | p.P553P                         |
|       |       |                | 50% | chr4  | 55141055  | A     | G       | 100% | 200% | 3416.28  | 187     | 188  | ---                   | PDGFRA                      | 567     | SNP            | Synonymous variant (4%)         |
|       |       |                | 50% | chr4  | 153249385 | G     | A       | 29%  | 57%  | 942.44   | 351     | 100  | ---                   | FBXW7                       | 289/465 | Missense       | R>C, codon not well annotated   |
|       |       |                | 50% | chr4  | 153249385 | G     | A       | 29%  | 57%  | 918.12   | 351     | 100  | COSM170725            | FBXW7                       | 385     | Missense       | p.R385C                         |
|       |       |                | 50% | chr4  | 153249385 | G     | A       | 29%  | 57%  | 918.12   | 351     | 100  | COSM170726            | FBXW7                       | 226     | Missense       | p.R226C                         |
|       |       |                | 50% | chr4  | 153249385 | G     | A       | 29%  | 57%  | 918.12   | 351     | 100  | COSM170727            | FBXW7                       | 465     | Missense       | p.R465C                         |
|       |       |                | 50% | chr4  | 153249385 | G     | A       | 29%  | 57%  | 918.12   | 351     | 100  | COSM22932             | FBXW7                       | 465     | Missense       | p.R465C                         |
|       |       |                | 50% | chr5  | 112175617 | T     | A       | 46%  | 92%  | 1298.24  | 245     | 113  | COSM19049             | APC                         | 1442    | Silent         | p.P1442P                        |
|       |       |                | 50% | chr5  | 112175770 | G     | A       | 100% | 200% | 7429.04  | 420     | 419  | ---                   | APC                         | 1493    | SNP            | Synonymous variant (34%)        |
|       |       |                | 50% | chr5  | 149433596 | TG    | GA      | 31%  | 62%  | 364.77   | 159     | 49   | ---                   | CSF1R                       | ?       | SNP            | Downstream gene variant         |
|       |       |                | 50% | chr7  | 55249063  | G     | A       | 100% | 200% | 2809.21  | 179     | 179  | ---                   | EGFR                        | ?       | SNP            | Intronic variant (42%)          |
|       |       |                | 50% | chr10 | 43613843  | G     | T       | 100% | 200% | 3766.15  | 237     | 237  | ---                   | RET                         | 769     | SNP            | Synonymous variant (28%)        |
|       |       |                | 50% | chr10 | 43615633  | C     | G       | 63%  | 126% | 1286.41  | 177     | 113  | ---                   | RET                         | 904     | SNP            | Synonymous variant (16%)        |
|       |       |                | 50% | chr11 | 534242    | A     | G       | 43%  | 85%  | 1325.79  | 273     | 117  | COSM249860            | HRAS                        | 27      | Silent         | p.H27H                          |
|       |       |                | 50% | chr12 | 25380276  | T     | A       | 54%  | 108% | 6126.81  | 883     | 479  | COSM553               | KRAS                        | 61      | Missense       | p.Q61L                          |
|       |       |                | 50% | chr13 | 28610183  | A     | G       | 46%  | 92%  | 3056.37  | 688     | 316  | ---                   | FLT3                        | ?       | SNP            | Splice region variant (38%)     |
| 50%   | chr17 | 7579472        | G   | C     | 99%       | 197%  | 4022.71 | 235  | 232  | ---      | TP53    | 72   | Missense              | Missense (P/R) - Tolerated  |         |                |                                 |
| 50%   | chr19 | 1220321        | T   | C     | 43%       | 86%   | 426.51  | 110  | 48   | ---      | STK11   | ?    | SNP                   | Intronic variant (35%)      |         |                |                                 |
| PF259 | 3%    | Jubular Adenon | 38% | chr2  | 212812097 | T     | C       | 49%  | 131% | 1226.54  | 246     | 121  | ---                   | ERBB4                       | ?       | SNP            | Intronic variant (33%)          |
|       |       |                | 38% | chr4  | 1807894   | G     | A       | 100% | 265% | 3116.83  | 197     | 196  | ---                   | FGFR3                       | 651     | SNP            | Synonymous variant (4%)         |
|       |       |                | 38% | chr4  | 55141055  | A     | G       | 100% | 267% | 4480.21  | 252     | 252  | ---                   | PDGFRA                      | 567     | SNP            | Synonymous variant (4%)         |
|       |       |                | 38% | chr4  | 55152040  | C     | T       | 53%  | 141% | 2742.5   | 420     | 223  | COSM22413             | PDGFRA                      | 824     | Silent         | p.V824V                         |
|       |       |                | 38% | chr4  | 55962546  | -     | G       | 43%  | 114% | 968.46   | 511     | 161  | ---                   | KDR                         | ?       | Insertion      | Noncoding region, unknown       |
|       |       |                | 38% | chr4  | 55972974  | T     | A       | 51%  | 135% | 2385.76  | 465     | 236  | ---                   | KDR                         | 472     | Missense       | Missense (Q>H) - Tolerated      |
|       |       |                | 38% | chr4  | 55980239  | C     | T       | 100% | 267% | 2351.96  | 154     | 154  | ---                   | KDR                         | ?       | SNP            | Intronic variant (48%)          |
|       |       |                | 38% | chr5  | 112175212 | AAAAG | -       | 77%  | 205% | 2070.29  | 174     | 139  | ---                   | APC                         | 1307    | Missense       | Truncation, missense pathogenic |
|       |       |                | 38% | chr5  | 112175212 | AAAAG | -       | 77%  | 205% | 2089.86  | 183     | 139  | COSM18764             | APC                         | 1309    | Frameshift Del | p.E1309fs*4                     |
|       |       |                | 38% | chr5  | 112175213 | AAAGA | -       | 77%  | 205% | 2089.86  | 183     | 139  | COSM19263             | APC                         | 1309    | Frameshift Del | p.E1309fs*4                     |
|       |       |                | 38% | chr5  | 112175216 | GAAAA | -       | 77%  | 205% | 2089.86  | 183     | 139  | COSM19145             | APC                         | 1309    | Frameshift Del | p.E1309fs*4                     |
|       |       |                | 38% | chr5  | 112175217 | AAAAG | -       | 77%  | 205% | 2089.86  | 183     | 139  | COSM18701             | APC                         | 1309    | Frameshift Del | p.E1309fs*4                     |
|       |       |                | 38% | chr5  | 112175218 | AAAGA | -       | 77%  | 205% | 2089.86  | 183     | 139  | COSM13113             | APC                         | 1309    | Frameshift Del | p.E1309fs*4                     |
|       |       |                | 38% | chr5  | 112175770 | G     | A       | 84%  | 224% | 7483.31  | 562     | 471  | ---                   | APC                         | 1493    | SNP            | Synonymous, codon 1493          |
|       |       |                | 38% | chr5  | 149433596 | TG    | GA      | 99%  | 264% | 1751.72  | 117     | 116  | ---                   | CSF1R                       | ?       | SNP            | Downstream gene variant         |
|       |       |                | 38% | chr7  | 55249063  | G     | A       | 56%  | 148% | 884.89   | 152     | 86   | ---                   | EGFR                        | ?       | SNP            | Intronic variant (42%)          |
|       |       |                | 38% | chr10 | 43613843  | G     | T       | 100% | 267% | 4771.16  | 305     | 306  | ---                   | RET                         | 769     | SNP            | Synonymous variant (28%)        |
|       |       |                | 38% | chr10 | 43615633  | C     | G       | 47%  | 126% | 1024.69  | 224     | 106  | ---                   | RET                         | 904     | SNP            | Synonymous variant (16%)        |
|       |       |                | 38% | chr11 | 534242    | A     | G       | 100% | 267% | 4275.45  | 242     | 243  | COSM249860            | HRAS                        | 27      | Silent         | p.H27H                          |
|       |       |                | 38% | chr13 | 28610183  | A     | G       | 47%  | 125% | 2975.9   | 656     | 308  | ---                   | FLT3                        | ?       | SNP            | Splice region variant (38%)     |
|       |       |                | 38% | chr17 | 7577022   | G     | A       | 12%  | 31%  | 122.1    | 180     | 21   | COSM10663             | TP53                        | 306     | Nonsense       | p.R306*                         |
|       |       |                | 38% | chr17 | 7577022   | G     | A       | 12%  | 31%  | 122.1    | 180     | 21   | COSM99947             | TP53                        | 306     | Nonsense       | p.R306*                         |
| 38%   | chr19 | 1220321        | T   | C     | 53%       | 141%  | 1032.7  | 187  | 99   | ---      | STK11   | ?    | SNP                   | Intronic variant (35%)      |         |                |                                 |
| 38%   | chr22 | 24176287       | G   | A     | 53%       | 141%  | 1859.42 | 279  | 148  | COSM1090 | SMARCB1 | ?    | Intronic Substitution | p.?                         |         |                |                                 |
| 264   | -4%   | Jubular Adenon | 25% | chr4  | 1807894   | G     | A       | 100% | 400% | 10396.1  | 648     | 648  | ---                   | FGFR3                       | 651     | SNP            | Synonymous variant (4%)         |
|       |       |                | 25% | chr4  | 55141055  | A     | G       | 99%  | 396% | 14055.9  | 795     | 790  | ---                   | PDGFRA                      | 567     | SNP            | Synonymous variant (4%)         |
|       |       |                | 25% | chr4  | 55962546  | -     | G       | 100% | 400% | 13268.7  | 1994    | 1072 | ---                   | KDR                         | ?       | Insertion      | Noncoding region, unknown       |
|       |       |                | 25% | chr4  | 55972974  | T     | A       | 100% | 400% | 26591.9  | 1665    | 1666 | ---                   | KDR                         | 472     | Missense       | Missense (Q>H) - Tolerated      |
|       |       |                | 25% | chr4  | 55980239  | C     | T       | 99%  | 395% | 8308.04  | 536     | 529  | ---                   | KDR                         | ?       | SNP            | Intronic variant (48%)          |
|       |       |                | 25% | chr5  | 112175576 | C     | T       | 11%  | 46%  | 554.43   | 906     | 103  | COSM18836             | APC                         | 1429    | Nonsense       | p.Q1429*                        |
|       |       |                | 25% | chr5  | 112175639 | C     | T       | 10%  | 41%  | 460.93   | 911     | 93   | COSM13127             | APC                         | 1450    | Nonsense       | p.R1450*                        |
|       |       |                | 25% | chr5  | 112175770 | G     | A       | 100% | 400% | 33650.7  | 1857    | 1853 | ---                   | APC                         | 1493    | SNP            | Synonymous                      |
|       |       |                | 25% | chr7  | 55249063  | G     | A       | 99%  | 395% | 7745.81  | 496     | 491  | ---                   | EGFR                        | ?       | SNP            | Intronic variant (42%)          |
|       |       |                | 25% | chr10 | 43613843  | G     | T       | 100% | 400% | 16640.8  | 1038    | 1039 | ---                   | RET                         | 769     | SNP            | Synonymous variant (28%)        |
|       |       |                | 25% | chr10 | 43615633  | C     | G       | 50%  | 202% | 3668.52  | 715     | 362  | ---                   | RET                         | 904     | SNP            | Synonymous variant (16%)        |
|       |       |                | 25% | chr11 | 534242    | A     | G       | 99%  | 396% | 17690.1  | 983     | 981  | COSM249860            | HRAS                        | 27      | Silent         | p.H27H                          |
|       |       |                | 25% | chr13 | 28602292  | T     | C       | 52%  | 208% | 10803.6  | 2226    | 1039 | ---                   | FLT3                        | ?       | SNP            | Intronic variant (4%)           |
| 25%   | chr13 | 28610183       | A   | G     | 100%      | 400%  | 31810.3 | 2602 | 1993 | ---      | FLT3    | ?    | SNP                   | Splice region variant (38%) |         |                |                                 |

|       |      |                                           |          |     |       |           |     |        |       |       |         |         |      |            |                    |         |                |                                                |
|-------|------|-------------------------------------------|----------|-----|-------|-----------|-----|--------|-------|-------|---------|---------|------|------------|--------------------|---------|----------------|------------------------------------------------|
|       |      |                                           |          | 25% | chr17 | 7579472   | G   | C      | 57%   | 228%  | 5031.83 | 622     | 411  | ---        | TP53               | 72      | Missense       | Missense (P/R) - Tolerated                     |
|       |      |                                           |          | 25% | chr19 | 1220321   | T   | C      | 57%   | 226%  | 2990.46 | 482     | 275  | ---        | STK11              | ?       | SNP            | Intronic variant (35%)                         |
|       |      |                                           |          | 25% | chr19 | 17945696  | C   | T      | 50%   | 199%  | 4324.12 | 722     | 359  | COSM34213  | JAK3               | 722     | Missense       | p.V722I                                        |
| PF270 | 24%  | Tubular Adenoma with High Grade Dysplasia |          | 45% | chr4  | 1807894   | G   | A      | 100%  | 222%  | 160.32  | 14      | 14   | ---        | FGFR3              | 651     | SNP            | Synonymous variant (4%)                        |
|       |      |                                           |          | 45% | chr4  | 153249384 | C   | T      | 46%   | 103%  | 99.53   | 26      | 12   | COSM117308 | FBXW7              | 385     | Missense       | p.R385H                                        |
|       |      |                                           |          | 45% | chr4  | 153249384 | C   | T      | 46%   | 103%  | 99.53   | 26      | 12   | COSM117309 | FBXW7              | 226     | Missense       | p.R226H                                        |
|       |      |                                           |          | 45% | chr4  | 153249384 | C   | T      | 46%   | 103%  | 99.53   | 26      | 12   | COSM117310 | FBXW7              | 465     | Missense       | p.R465H                                        |
|       |      |                                           |          | 45% | chr4  | 153249384 | C   | T      | 46%   | 103%  | 99.53   | 26      | 12   | COSM22965  | FBXW7              | 465     | Missense       | p.R465H                                        |
|       |      |                                           |          | 45% | chr7  | 116339672 | C   | T      | 76%   | 168%  | 459.92  | 53      | 40   | ---        | MET                | 178     | Silent         | p.S178S COSM1579024                            |
|       |      |                                           |          | 45% | chr9  | 139390805 | G   | -      | 63%   | 139%  | 77.89   | 16      | 10   | COSM13070  | NOTCH1             | 2463    | Frameshift Del | p.A2463fs*14                                   |
|       |      |                                           |          | 45% | chr11 | 534242    | A   | G      | 71%   | 159%  | 149.75  | 21      | 15   | COSM249860 | HRAS               | 27      | Silent         | p.H27H                                         |
|       |      |                                           |          | 45% | chr17 | 7578265   | A   | G      | 91%   | 201%  | 225.9   | 20      | 19   | ---        | TP53               | 195     | Missense       | p.I195T, predicted to be deleterious           |
|       |      |                                           |          | 45% | chr17 | 7578265   | A   | G      | 87%   | 193%  | 234.7   | 23      | 20   | COSM11089  | TP53               | 195     | Missense       | p.I195T                                        |
|       |      |                                           |          | 45% | chr17 | 7579472   | G   | C      | 100%  | 222%  | 217.33  | 17      | 18   | ---        | TP53               | 72      | Missense       | Missense (P/R) - Tolerated                     |
| PF273 | 43%  | Tubular Adenoma                           |          | 10% | chr2  | 212812097 | T   | C      | 62%   | 618%  | 3852.45 | 551     | 341  | ---        | ERBB4              | ?       | SNP            | Intronic variant (33%)                         |
|       |      |                                           |          | 10% | chr4  | 1807894   | G   | A      | 100%  | 1000% | 10586.2 | 666     | 666  | ---        | FGFR3              | 651     | SNP            | Synonymous variant (4%)                        |
|       |      |                                           |          | 10% | chr4  | 55141055  | A   | G      | 100%  | 1000% | 21415.6 | 1161    | 1189 | ---        | PDGFRA             | 567     | SNP            | Synonymous variant (4%)                        |
|       |      |                                           |          | 10% | chr4  | 55593464  | A   | C      | 100%  | 1000% | 36234.8 | 2657    | 1990 | COSM28026  | KIT                | 541     | Missense       | p.M541L                                        |
|       |      |                                           |          | 10% | chr5  | 112175656 | -   | A      | 8%    | 76%   | 93.57   | 1024    | 77   | COSM19119  | APC                | 1455    | Frameshift Ins | p.N1455fs*2                                    |
|       |      |                                           |          | 10% | chr5  | 112175770 | G   | A      | 60%   | 601%  | 14447.9 | 1773    | 1087 | ---        | APC                | 1493    | SNP            | Synonymous                                     |
|       |      |                                           |          | 10% | chr5  | 149433596 | TG  | GA     | 100%  | 1000% | 6940.08 | 446     | 444  | ---        | CSF1R              | ?       | SNP            | Downstream gene variant                        |
|       |      |                                           |          | 10% | chr7  | 55249063  | G   | A      | 100%  | 1000% | 10251   | 644     | 650  | ---        | EGFR               | ?       | SNP            | Intronic variant (42%)                         |
|       |      |                                           |          | 10% | chr9  | 139390805 | G   | -      | 100%  | 1000% | 7211.05 | 542     | 553  | COSM13070  | NOTCH1             | 2463    | Frameshift Del | p.A2463fs*14                                   |
|       |      |                                           |          | 10% | chr10 | 43613843  | G   | T      | 100%  | 1000% | 21282.4 | 1331    | 1332 | ---        | RET                | 769     | SNP            | Synonymous variant (28%)                       |
|       |      |                                           |          | 10% | chr11 | 534242    | A   | G      | 49%   | 492%  | 6554.39 | 1080    | 536  | COSM249860 | HRAS               | 27      | Silent         | p.H27H                                         |
|       |      |                                           |          | 10% | chr13 | 28610183  | A   | G      | 100%  | 1000% | 31867.2 | 3590    | 1995 | ---        | FLT3               | ?       | SNP            | Splice region variant (38%)                    |
|       |      |                                           |          | 10% | chr17 | 7579472   | G   | C      | 100%  | 1000% | 11863.8 | 632     | 687  | ---        | TP53               | 72      | Missense       | Missense (P/R) - Tolerated                     |
|       | 10%  | chr22                                     | 24134064 | C   | A     | 9%        | 87% | 348.71 | 1567  | 114   | ---     | SMARCB1 | 72   | Missense   | p.T72K - tolerated |         |                |                                                |
| PF274 | ~40% | Tubular Adenoma                           |          | 30% | chr2  | 212812097 | T   | C      | 51%   | 170%  | 7217.89 | 1375    | 704  | ---        | ERBB4              | ?       | SNP            | Intronic variant (33%)                         |
|       |      |                                           |          | 30% | chr4  | 1807894   | G   | A      | 100%  | 333%  | 10035.8 | 634     | 633  | ---        | FGFR3              | 651     | SNP            | Synonymous variant (4%)                        |
|       |      |                                           |          | 30% | chr4  | 55141055  | A   | G      | 100%  | 333%  | 24646.7 | 1328    | 1374 | ---        | PDGFRA             | 567     | SNP            | Synonymous variant (4%)                        |
|       |      |                                           |          | 30% | chr4  | 55593464  | A   | C      | 100%  | 333%  | 36272.8 | 2594    | 1991 | COSM28026  | KIT                | 541     | Missense       | p.M541L                                        |
|       |      |                                           |          | 30% | chr5  | 112175656 | -   | A      | 8%    | 28%   | 112.78  | 1023    | 85   | COSM19119  | APC                | 1455    | Frameshift Ins | p.N1455fs*2                                    |
|       |      |                                           |          | 30% | chr5  | 112175770 | G   | A      | 79%   | 263%  | 24036.3 | 2351    | 1564 | ---        | APC                | 1493    | SNP            | Synonymous                                     |
|       |      |                                           |          | 30% | chr5  | 149433596 | TG  | GA     | 100%  | 333%  | 8089.48 | 510     | 510  | ---        | CSF1R              | ?       | SNP            | 3' UTR variant                                 |
|       |      |                                           |          | 30% | chr7  | 55249063  | G   | A      | 100%  | 333%  | 9536.9  | 600     | 604  | ---        | EGFR               | ?       | SNP            | Protein coding, synonymous variant             |
|       |      |                                           |          | 30% | chr9  | 139390805 | G   | -      | 100%  | 333%  | 6123.92 | 494     | 501  | COSM13070  | NOTCH1             | 2463    | Frameshift Del | p.A2463fs*14                                   |
|       |      |                                           |          | 30% | chr10 | 43613843  | G   | T      | 100%  | 333%  | 21578.4 | 1347    | 1355 | ---        | RET                | 769     | SNP            | Synonymous variant                             |
|       |      |                                           |          | 30% | chr11 | 534242    | A   | G      | 50%   | 167%  | 6138.89 | 1000    | 505  | COSM249860 | HRAS               | 27      | Silent         | p.H27H                                         |
|       |      |                                           |          | 30% | chr13 | 28610183  | A   | G      | 100%  | 333%  | 31831.1 | 3426    | 1993 | ---        | FLT3               | ?       | SNP            | Splice region variant (38%)                    |
|       |      |                                           |          | 30% | chr17 | 7579472   | G   | C      | 100%  | 333%  | 12491   | 656     | 752  | ---        | TP53               | 72      | Missense       | Variant (P>R), not pathogenic                  |
|       |      |                                           |          | 30% | chr22 | 24134064  | C   | A      | 13%   | 42%   | 726.75  | 1700    | 178  | ---        | SMARCB1            | 72      | Missense       | p.T72K - tolerated                             |
| 276   | ~23% | Sessile Serrated Adenoma                  |          | 60% | chr2  | 209113154 | G   | A      | 6%    | 11%   | 209.71  | 2322    | 128  | ---        | IDH1               | 118     | Missense       | p.P118L, conflicting predicted results         |
|       |      |                                           |          | 60% | chr4  | 1807871   | A   | G      | 7%    | 11%   | 219     | 4937    | 130  | ---        | FGFR3              | 532/644 | Missense       | p.N532/644D                                    |
|       |      |                                           |          | 60% | chr4  | 1807894   | G   | A      | 100%  | 167%  | 31768.9 | 5357    | 1989 | ---        | FGFR3              | 651     | SNP            | Synonymous variant (4%)                        |
|       |      |                                           |          | 60% | chr4  | 55141055  | A   | G      | 100%  | 167%  | 17489   | 949     | 964  | ---        | PDGFRA             | 567     | SNP            | Synonymous variant (4%)                        |
|       |      |                                           |          | 60% | chr4  | 55980239  | C   | T      | 33%   | 55%   | 1422.68 | 542     | 178  | ---        | KDR                | ?       | SNP            | Intronic variant (48%)                         |
|       |      |                                           |          | 60% | chr4  | 153247358 | T   | C      | 6%    | 10%   | 179.96  | 10472   | 121  | ---        | FBXW7              | 482     | Missense       | p.T482A, deleterious by both SIFT and PolyPhen |
|       |      |                                           |          | 60% | chr5  | 112175589 | C   | T      | 6%    | 10%   | 98.32   | 1151    | 67   | ---        | APC                | 1433    | Missense       | Missense (P>L) Deleterious                     |
|       |      |                                           |          | 60% | chr5  | 112175770 | G   | A      | 100%  | 167%  | 16259.6 | 888     | 893  | ---        | APC                | 1493    | SNP            | Synonymous                                     |
|       |      |                                           |          | 60% | chr5  | 149433596 | TG  | GA     | 28%   | 47%   | 3227.05 | 1591    | 449  | ---        | CSF1R              | ?       | SNP            | Downstream gene variant                        |
|       |      |                                           |          | 60% | chr7  | 55249174  | A   | G      | 7%    | 11%   | 211     | 2813    | 127  | ---        | EGFR               | ?       | SNP            | intronic variant rs191420937                   |
|       |      |                                           |          | 60% | chr7  | 116339673 | G   | A      | 6%    | 10%   | 156.32  | 12767   | 115  | ---        | MET                | 179     | Missense       | p.A179T, predicted to be benign                |
|       |      |                                           |          | 60% | chr9  | 139399341 | T   | A      | 5%    | 8%    | 89.53   | 1695    | 85   | ---        | NOTCH1             | 1601    | Missense       | p.H1601L, predicted to be benign               |
|       |      |                                           |          | 60% | chr10 | 43613843  | G   | T      | 48%   | 80%   | 9557.24 | 4355    | 961  | ---        | RET                | 769     | SNP            | Synonymous variant (28%)                       |
|       |      |                                           |          | 60% | chr11 | 534242    | A   | G      | 52%   | 87%   | 13226.9 | 6506    | 1048 | COSM249860 | HRAS               | 27      | Silent         | p.H27H                                         |
|       |      |                                           |          | 60% | chr11 | 108236261 | A   | C      | 5%    | 8%    | 78.27   | 1679    | 81   | ---        | ATM                | ?       | SNP            | 3' UTR variant                                 |
|       |      |                                           |          | 60% | chr13 | 28602292  | T   | C      | 49%   | 82%   | 9961.92 | 6462    | 987  | ---        | FLT3               | ?       | SNP            | Intronic variant (4%)                          |
|       |      |                                           |          | 60% | chr13 | 28610183  | A   | G      | 100%  | 167%  | 31925.2 | 9350    | 1996 | ---        | FLT3               | ?       | SNP            | Splice region variant (38%)                    |
|       | 60%  | chr16                                     | 68835637 | A   | G     | 6%        | 10% | 167.83 | 19974 | 118   | ---     | CDH1    | 76   | Silent     | p.K76K             |         |                |                                                |

|       |      |                |           |       |          |           |       |         |      |         |           |         |          |                       |                        |                       |                       |                                                  |
|-------|------|----------------|-----------|-------|----------|-----------|-------|---------|------|---------|-----------|---------|----------|-----------------------|------------------------|-----------------------|-----------------------|--------------------------------------------------|
|       |      |                |           | 60%   | chr17    | 7579472   | G     | C       | 93%  | 155%    | 11383.1   | 721     | 675      | ---                   | TP53                   | 72                    | Missense              | Missense (P/R) - Tolerated                       |
|       |      |                |           | 60%   | chr22    | 24176287  | G     | A       | 51%  | 84%     | 7210.71   | 1149    | 585      | COSM1090              | SMARCB1                | ?                     | Intronic Substitution | p.?                                              |
| 277   | 66%  | Jubular Adenon |           | 13%   | chr4     | 1807894   | G     | A       | 100% | 800%    | 26155.1   | 1639    | 1642     | ---                   | FGFR3                  | 651                   | SNP                   | Synonymous variant (4%)                          |
|       |      |                |           | 13%   | chr4     | 55141055  | A     | G       | 100% | 800%    | 35514.9   | 2229    | 1954     | ---                   | PDGFRA                 | 567                   | SNP                   | Synonymous variant (4%)                          |
|       |      |                |           | 13%   | chr4     | 55980239  | C     | T       | 35%  | 278%    | 5467.34   | 1917    | 668      | ---                   | KDR                    | ?                     | SNP                   | Intronic variant (48%)                           |
|       |      |                |           | 13%   | chr5     | 112175770 | G     | A       | 100% | 800%    | 36047     | 4402    | 1980     | ---                   | APC                    | 1439                  | SNP                   | Synonymous                                       |
|       |      |                |           | 13%   | chr5     | 149433596 | TG    | GA      | 27%  | 214%    | 2680.54   | 1443    | 387      | ---                   | CSF1R                  | ?                     | SNP                   | Downstream gene variant                          |
|       |      |                |           | 13%   | chr10    | 43613843  | G     | T       | 52%  | 414%    | 10711.8   | 2556    | 1033     | ---                   | RET                    | 769                   | SNP                   | Synonymous variant (28%)                         |
|       |      |                |           | 13%   | chr11    | 534242    | A     | G       | 48%  | 385%    | 9884.31   | 1702    | 824      | COSM249860            | HRAS                   | 27                    | Silent                | p.H27H                                           |
|       |      |                |           | 13%   | chr13    | 28602292  | T     | C       | 49%  | 388%    | 9670.64   | 4772    | 969      | ---                   | FLT3                   | ?                     | SNP                   | Intronic variant (4%)                            |
|       |      |                |           | 13%   | chr13    | 28610183  | A     | G       | 100% | 800%    | 31963.7   | 5395    | 1997     | ---                   | FLT3                   | ?                     | SNP                   | Splice region variant (38%)                      |
|       |      |                |           | 13%   | chr17    | 7579472   | G     | C       | 100% | 800%    | 31383.8   | 1695    | 1762     | ---                   | TP53                   | 72                    | Missense              | Missense (P/R) - Tolerated                       |
|       |      |                | 13%       | chr22 | 24176287 | G         | A     | 48%     | 386% | 11676.1 | 2473      | 964     | COSM1090 | SMARCB1               | ?                      | Intronic Substitution | p.?                   |                                                  |
| PF278 | -49% | Jubular Adenon |           | 13%   | chr2     | 209113192 | G     | A       | 99%  | 790%    | 35503.2   | 5640    | 1973     | NOCOSMIC105           | IDH1                   | 105                   | SNP                   | Synonymous variant (5%)                          |
|       |      |                |           | 13%   | chr4     | 1807894   | G     | A       | 100% | 800%    | 18303.3   | 1150    | 1152     | ---                   | FGFR3                  | ?                     | SNP                   | Protein coding, synonymous variant               |
|       |      |                |           | 13%   | chr4     | 55141055  | A     | G       | 100% | 800%    | 19040.7   | 1051    | 1073     | ---                   | PDGFRA                 | ?                     | SNP                   | Protein coding, synonymous variant               |
|       |      |                |           | 13%   | chr4     | 55593481  | A     | G       | 50%  | 398%    | 12269.4   | 3703    | 996      | COSM21983             | KIT                    | 546                   | Silent                | p.K546K                                          |
|       |      |                |           | 13%   | chr4     | 55980239  | C     | T       | 22%  | 172%    | 1101.5    | 865     | 185      | ---                   | KDR                    | ?                     | SNP                   | Intronic variant                                 |
|       |      |                |           | 13%   | chr5     | 112175379 | AAAGT | -       | 12%  | 93%     | 254.49    | 2363    | 227      | ---                   | APC                    | 1363                  | Deletion              | p.KS?1363? Out of frame deletion, effect unknown |
|       |      |                |           | 13%   | chr5     | 112175656 | -     | A       | 12%  | 93%     | 227.9     | 1286    | 149      | COSM19119             | APC                    | 1455                  | Frameshift Ins        | p.N1455fs*2                                      |
|       |      |                |           | 13%   | chr5     | 112175770 | G     | A       | 50%  | 398%    | 12025.5   | 2123    | 981      | ---                   | APC                    | 1493                  | SNP                   | Synonymous variant (34%)                         |
|       |      |                |           | 13%   | chr5     | 149433596 | TG    | GA      | 99%  | 791%    | 8319.84   | 530     | 528      | ---                   | CSF1R                  | ?                     | SNP                   | Downstream gene variant (27%)                    |
|       |      |                |           | 13%   | chr7     | 55249063  | G     | A       | 44%  | 350%    | 2932.14   | 711     | 314      | ---                   | EGFR                   | 742                   | SNP                   | Synonymous variant (42%)                         |
|       |      |                |           | 13%   | chr9     | 139390805 | G     | -       | 100% | 800%    | 8916.63   | 695     | 702      | COSM13070             | NOTCH1                 | 2463                  | Frameshift Del        | p.A2463fs*14                                     |
|       |      |                |           | 13%   | chr10    | 43613843  | G     | T       | 51%  | 406%    | 7474.56   | 1437    | 734      | ---                   | RET                    | 769                   | SNP                   | Synonymous variant (28%)                         |
|       |      |                |           | 13%   | chr13    | 28602292  | T     | C       | 51%  | 406%    | 10408.3   | 4001    | 1015     | ---                   | FLT3                   | ?                     | SNP                   | Intronic variant (4%)                            |
|       |      |                |           | 13%   | chr13    | 28610183  | A     | G       | 54%  | 433%    | 11494.8   | 4636    | 1081     | ---                   | FLT3                   | ?                     | SNP                   | Splice region variant (38%)                      |
|       |      |                |           | 13%   | chr17    | 7579472   | G     | C       | 89%  | 715%    | 13220     | 904     | 816      | ---                   | TP53                   | 72                    | Missense              | Missense (P/R) - Tolerated                       |
|       |      |                |           | 13%   | chr17    | 7579473   | G     | C       | 9%   | 74%     | 393.36    | 908     | 84       | ---                   | TP53                   | 72                    | Missense              | Missense (P/A) - Tolerated                       |
|       | 13%  | chr18          | 48586344  | C     | T        | 56%       | 446%  | 12018.6 | 3954 | 1113    | ---       | SMAD4   | ?        | SNP                   | Intronic variant (5%)  |                       |                       |                                                  |
|       | 13%  | chr19          | 1220321   | T     | C        | 51%       | 407%  | 4745.58 | 865  | 469     | ---       | STK11   | ?        | SNP                   | Intronic variant (35%) |                       |                       |                                                  |
|       | 13%  | chr22          | 24134064  | C     | A        | 13%       | 102%  | 521.6   | 1205 | 119     | ---       | SMARCB1 | 72       | Missense              | p.T72K - tolerated     |                       |                       |                                                  |
| PF279 | -22% | Hyperplastic   |           | 60%   | chr4     | 1807894   | G     | A       | 100% | 167%    | 29229.6   | 1832    | 1830     | ---                   | FGFR3                  | 651                   | SNP                   | Synonymous variant (4%)                          |
|       |      |                |           | 60%   | chr4     | 55141055  | A     | G       | 100% | 167%    | 30353.4   | 1663    | 1676     | ---                   | PDGFRA                 | 567                   | SNP                   | Synonymous variant (4%)                          |
|       |      |                |           | 60%   | chr4     | 55152040  | C     | T       | 98%  | 163%    | 34730.9   | 2752    | 1953     | COSM22413             | PDGFRA                 | 824                   | Silent                | p.V824V                                          |
|       |      |                |           | 60%   | chr4     | 55980239  | C     | T       | 35%  | 59%     | 4779.03   | 1657    | 583      | ---                   | KDR                    | ?                     | SNP                   | Intronic variant (48%)                           |
|       |      |                |           | 60%   | chr5     | 112175643 | -     | CA      | 13%  | 22%     | 1428.91   | 1955    | 257      | ---                   | APC                    | 1451                  | insertion             | p.E1451A?, probably pathogenic?                  |
|       |      |                |           | 60%   | chr5     | 112175770 | G     | A       | 52%  | 87%     | 13071.7   | 4431    | 1040     | ---                   | APC                    | 1493                  | SNP                   | Synonymous                                       |
|       |      |                |           | 60%   | chr5     | 149433596 | TG    | GA      | 26%  | 43%     | 2847.26   | 1623    | 419      | ---                   | CSF1R                  | ?                     | SNP                   | 3' UTR variant                                   |
|       |      |                |           | 60%   | chr5     | 170837514 | -     | T       | 97%  | 161%    | 4700.04   | 2444    | 1795     | ---                   | NPM1                   | ?                     | insertion             | intronic variant                                 |
|       |      |                |           | 60%   | chr7     | 55249063  | G     | A       | 51%  | 85%     | 6874.72   | 1312    | 672      | ---                   | EGFR                   | ?                     | SNP                   | Protein coding, synonymous variant               |
|       |      |                |           | 60%   | chr7     | 116340269 | C     | T       | 49%  | 81%     | 9695.65   | 2172    | 970      | ---                   | MET                    | 377                   | Silent                | p.I377I                                          |
|       |      |                |           | 60%   | chr10    | 43613843  | G     | T       | 100% | 167%    | 31528.7   | 2332    | 1984     | ---                   | RET                    | 769                   | SNP                   | Synonymous variant (28%)                         |
|       |      |                |           | 60%   | chr11    | 534242    | A     | G       | 98%  | 164%    | 35239.8   | 2232    | 1968     | COSM249860            | HRAS                   | 27                    | Silent                | p.H27H                                           |
|       |      |                |           | 60%   | chr13    | 28610183  | A     | G       | 51%  | 85%     | 10488.3   | 5661    | 1020     | ---                   | FLT3                   | ?                     | SNP                   | Splice region variant (38%)                      |
|       |      |                |           | 60%   | chr17    | 7579472   | G     | C       | 65%  | 108%    | 17372.9   | 1853    | 1295     | ---                   | TP53                   | 72                    | Missense              | Missense tolerated (P>R), non-pathogenic         |
|       |      |                |           | 60%   | chr19    | 1221293   | C     | T       | 48%  | 80%     | 11481.9   | 5508    | 952      | COSM29005             | STK11                  | 272                   | Silent                | p.Y272Y                                          |
|       |      |                |           | 60%   | chr19    | 17954149  | A     | G       | 57%  | 95%     | 12227.7   | 2209    | 1122     | ---                   | JAK3                   | ?                     | SNP                   | intronic variant                                 |
|       | 60%  | chr19          | 17954215  | G     | T        | 58%       | 97%   | 15393.8 | 2227 | 1160    | COSM34216 | JAK3    | 132      | Missense              | p.P132T                |                       |                       |                                                  |
|       | 60%  | chr22          | 24176287  | G     | A        | 55%       | 91%   | 14071.2 | 2639 | 1093    | COSM1090  | SMARCB1 | ?        | Intronic Substitution | p.?                    |                       |                       |                                                  |
| PF285 | 12%  | Jubular Adenon |           | 20%   | chr2     | 212812097 | T     | C       | 54%  | 272%    | 5057.25   | 879     | 477      | ---                   | ERBB4                  | ?                     | SNP                   | Intronic variant (33%)                           |
|       |      |                |           | 20%   | chr3     | 178917005 | A     | G       | 45%  | 224%    | 3134.45   | 736     | 329      | ---                   | PIK3CA                 | ?                     | SNP                   | Downstream gene variant (22%)                    |
|       |      |                |           | 20%   | chr4     | 1807894   | G     | A       | 100% | 500%    | 32009.5   | 3100    | 1997     | ---                   | FGFR3                  | 651                   | SNP                   | Synonymous variant                               |
|       |      |                |           | 20%   | chr4     | 1807922   | G     | A       | 60%  | 298%    | 11811.5   | 2421    | 1010     | ---                   | FGFR3                  | ?                     | SNP                   | intronic variant                                 |
|       |      |                |           | 20%   | chr4     | 55141055  | A     | G       | 100% | 500%    | 30671.9   | 1675    | 1692     | ---                   | PDGFRA                 | 567                   | SNP                   | Synonymous variant (3%)                          |
|       |      |                |           | 20%   | chr5     | 112175162 | C     | T       | 10%  | 50%     | 372.11    | 756     | 76       | COSM19072             | APC                    | 1291                  | Nonsense              | p.Q1291*                                         |
|       |      |                |           | 20%   | chr5     | 112175770 | G     | A       | 100% | 500%    | 35806.3   | 3426    | 1982     | ---                   | APC                    | 1493                  | SNP                   | Synonymous                                       |
|       |      |                |           | 20%   | chr5     | 149433596 | TG    | GA      | 26%  | 129%    | 3203.21   | 1836    | 474      | ---                   | CSF1R                  | ?                     | SNP                   | Downstream gene variant                          |
|       | 20%  | chr5           | 170837514 | -     | T        | 96%       | 479%  | 313.97  | 1266 | 1507    | ---       | NPM1    | ?        | insertion             | intronic variant       |                       |                       |                                                  |

|       |      |                |     |       |           |    |    |      |      |         |      |      |            |        |      |                |                                        |
|-------|------|----------------|-----|-------|-----------|----|----|------|------|---------|------|------|------------|--------|------|----------------|----------------------------------------|
|       |      |                | 20% | chr7  | 55249063  | G  | A  | 100% | 500% | 14404.8 | 906  | 906  | ---        | EGFR   | ?    | SNP            | Intronic variant (42%)                 |
|       |      |                | 20% | chr10 | 43613843  | G  | T  | 98%  | 492% | 30868.2 | 3089 | 1964 | ---        | RET    | 769  | SNP            | Synonymous variant (28%)               |
|       |      |                | 20% | chr10 | 43615633  | C  | G  | 51%  | 255% | 9751.38 | 1858 | 952  | ---        | RET    | 904  | SNP            | Synonymous variant (16%)               |
|       |      |                | 20% | chr11 | 108138003 | T  | C  | 49%  | 247% | 12074.9 | 9249 | 985  | COSM21826  | ATM    | 858  | Missense       | p.F858L                                |
|       |      |                | 20% | chr13 | 28610183  | A  | G  | 55%  | 274% | 11718.5 | 8213 | 1095 | ---        | FLT3   | ?    | SNP            | Splice region variant (38%)            |
|       |      |                | 20% | chr17 | 7579472   | G  | C  | 90%  | 452% | 30271.7 | 2042 | 1807 | ---        | TP53   | 72   | Missense       | Missense (P/R) - Tolerated             |
|       |      |                | 20% | chr18 | 48586344  | C  | T  | 49%  | 244% | 9732.99 | 5388 | 972  | ---        | SMAD4  | ?    | SNP            | Intronic variant (5%)                  |
| PF287 | 38%  | Tubulovillous  | 50% | chr3  | 178917005 | A  | G  | 100% | 200% | 22826.5 | 1448 | 1438 | ---        | PIK3CA | ?    | SNP            | Downstream gene variant (22%)          |
|       |      |                | 50% | chr3  | 178927410 | A  | G  | 56%  | 111% | 11960.7 | 2122 | 1109 | ---        | PIK3CA | 391  | SNP            | Missense (I>M) - Tolerated             |
|       |      |                | 50% | chr4  | 1807894   | G  | A  | 100% | 200% | 31908.9 | 2452 | 1994 | ---        | FGFR3  | 651  | SNP            | Synonymous variant (4%)                |
|       |      |                | 50% | chr4  | 55141055  | A  | G  | 100% | 200% | 30812.6 | 1680 | 1696 | ---        | PDGFRA | 567  | SNP            | Synonymous variant (4%)                |
|       |      |                | 50% | chr4  | 55597458  | A  | G  | 47%  | 94%  | 9218.04 | 6213 | 939  | ---        | KIT    |      | SNP            | intronic variant                       |
|       |      |                | 50% | chr4  | 55962546  | -  | G  | 100% | 200% | 24083.4 | 4283 | 1959 | ---        | KDR    | ?    | SNP            | Noncoding region, unknown              |
|       |      |                | 50% | chr4  | 55972996  | A  | C  | 45%  | 89%  | 8442.76 | 2739 | 887  | ---        | KDR    |      | SNP            | intronic variant                       |
|       |      |                | 50% | chr4  | 55980239  | C  | T  | 34%  | 68%  | 3384.74 | 1229 | 418  | ---        | KDR    | ?    | SNP            | Intronic variant (48%)                 |
|       |      |                | 50% | chr5  | 112175770 | G  | A  | 54%  | 108% | 13576.2 | 3229 | 1065 | ---        | APC    | 1493 | SNP            | Synonymous                             |
|       |      |                | 50% | chr5  | 112175957 | A  | -  | 31%  | 62%  | 3250.54 | 2939 | 605  | COSM18576  | APC    | 1556 | Frameshift del | p.T1556fs*9                            |
|       |      |                | 50% | chr5  | 149433596 | TG | GA | 100% | 200% | 21318.7 | 1334 | 1335 | ---        | CSF1R  | ?    | SNP            | Downstream gene variant                |
|       |      |                | 50% | chr7  | 55211073  | A  | G  | 50%  | 100% | 10129.4 | 6248 | 997  | ---        | EGFR   | 106  | Missense       | p.I106V predicted to be tolerated      |
|       |      |                | 50% | chr7  | 55249063  | G  | A  | 100% | 200% | 18045.3 | 1137 | 1135 | ---        | EGFR   | ?    | SNP            | Intronic variant (42%)                 |
|       |      |                | 50% | chr10 | 43613843  | G  | T  | 55%  | 109% | 11685.7 | 2412 | 1092 | ---        | RET    | 769  | SNP            | Synonymous variant (28%)               |
| PF288 | -8%  | Jubular Adenon | 40% | chr2  | 212812097 | T  | C  | 60%  | 151% | 9001.86 | 1322 | 799  | ---        | ERBB4  | ?    | SNP            | Intronic variant (33%)                 |
|       |      |                | 40% | chr4  | 1807894   | G  | A  | 100% | 250% | 24010.9 | 1501 | 1505 | ---        | FGFR3  | ?    | SNP            | Protein coding, synonymous variant     |
|       |      |                | 40% | chr4  | 1807922   | G  | A  | 54%  | 135% | 8523.37 | 1350 | 804  | ---        | FGFR3  |      | SNP            | intronic variant                       |
|       |      |                | 40% | chr4  | 55141055  | A  | G  | 100% | 250% | 34805.6 | 1894 | 1918 | ---        | PDGFRA | ?    | SNP            | Protein coding, synonymous variant     |
|       |      |                | 40% | chr4  | 55152040  | C  | T  | 49%  | 121% | 11780.1 | 3521 | 970  | COSM22413  | PDGFRA | 824  | Silent         | p.V824V                                |
|       |      |                | 40% | chr4  | 55593464  | A  | C  | 50%  | 126% | 12376   | 4724 | 1002 | COSM28026  | KIT    | 541  | Missense       | p.M541L                                |
|       |      |                | 40% | chr4  | 55980239  | C  | T  | 100% | 250% | 15778   | 992  | 989  | ---        | KDR    | ?    | SNP            | Intronic variant                       |
|       |      |                | 40% | chr5  | 112174577 | C  | T  | 32%  | 80%  | 6271.33 | 5320 | 635  | COSM13872  | APC    | 1096 | Nonsense       | p.Q1096*                               |
|       |      |                | 40% | chr5  | 112175770 | G  | A  | 50%  | 125% | 12232.3 | 4009 | 994  | ---        | APC    | 1493 | SNP            | Synonymous variant                     |
|       |      |                | 40% | chr5  | 149433596 | TG | GA | 100% | 250% | 14067.4 | 887  | 886  | ---        | CSF1R  | ?    | SNP            | Downstream gene variant                |
|       |      |                | 40% | chr5  | 170837526 | T  | C  | 6%   | 15%  | 376.44  | 1726 | 113  | ---        | NPM1   |      | SNP            | intronic variant                       |
|       |      |                | 40% | chr5  | 170837514 | -  | T  | 94%  | 235% | 376.44  | 1726 | 1748 | ---        | NPM1   |      | insertion      | intronic variant                       |
|       |      |                | 40% | chr7  | 55249063  | G  | A  | 100% | 250% | 20691.9 | 1286 | 1293 | ---        | EGFR   | ?    | SNP            | Protein coding, synonymous variant     |
|       |      |                | 40% | chr10 | 43613843  | G  | T  | 100% | 250% | 31953.9 | 2345 | 1992 | ---        | RET    | 769  | SNP            | Synonymous variant (28%)               |
|       |      |                | 40% | chr13 | 28610183  | A  | G  | 52%  | 131% | 10865.3 | 5736 | 1047 | ---        | FLT3   | ?    | SNP            | Splice region variant (38%)            |
|       |      |                | 40% | chr17 | 7579472   | G  | C  | 100% | 250% | 31903.7 | 1887 | 1758 | ---        | TP53   | 72   | Missense       | Missense variant (P/R) - Tolerated     |
|       |      |                | 40% | chr19 | 1220321   | T  | C  | 54%  | 135% | 7144.25 | 1240 | 673  | ---        | STK11  | ?    | SNP            | Intronic variant (35%)                 |
| PF289 | 1%   | Jubular Adenon | 30% | chr4  | 1807894   | G  | A  | 100% | 333% | 19666.9 | 1225 | 1230 | ---        | FGFR3  | 651  | SNP            | Synonymous variant (4%)                |
|       |      |                | 30% | chr4  | 55141055  | A  | G  | 100% | 333% | 34970.1 | 1956 | 1925 | ---        | PDGFRA | 567  | SNP            | Synonymous variant (4%)                |
|       |      |                | 30% | chr4  | 55962546  | -  | G  | 42%  | 140% | 4850.52 | 3957 | 833  | ---        | KDR    | ?    | Insertion      | Noncoding region, unknown              |
|       |      |                | 30% | chr4  | 55972974  | T  | A  | 49%  | 163% | 9789.96 | 3437 | 975  | ---        | KDR    | 472  | Missense       | Missense (Q/H) - Tolerated             |
|       |      |                | 30% | chr4  | 55980239  | C  | T  | 100% | 333% | 17872   | 1122 | 1122 | ---        | KDR    | ?    | SNP            | Intronic variant (49%)                 |
|       |      |                | 30% | chr4  | 55980288  | G  | A  | 20%  | 68%  | 2322.29 | 2132 | 405  | ---        | KDR    |      | SNP            | intronic variant/splice region variant |
|       |      |                | 30% | chr5  | 112175348 | G  | T  | 45%  | 150% | 10456.9 | 3616 | 893  | COSM19048  | APC    | 1353 | Nonsense       | p.E1353*                               |
|       |      |                | 30% | chr5  | 112175770 | G  | A  | 69%  | 229% | 19470.6 | 3981 | 1359 | ---        | APC    | 1493 | SNP            | Synonymous                             |
|       |      |                | 30% | chr5  | 149433596 | TG | GA | 100% | 333% | 12517.2 | 789  | 789  | ---        | CSF1R  | ?    | SNP            | Downstream gene variant                |
|       |      |                | 30% | chr10 | 43613843  | G  | T  | 49%  | 163% | 9843.62 | 2031 | 979  | ---        | RET    | 769  | SNP            | Synonymous variant (28%)               |
|       |      |                | 30% | chr11 | 534242    | A  | G  | 50%  | 167% | 9360.01 | 1515 | 765  | COSM249860 | HRAS   | 27   | Silent         | p.H27H                                 |
|       |      |                | 30% | chr13 | 28610183  | A  | G  | 50%  | 167% | 10234.6 | 5618 | 1005 | ---        | FLT3   | ?    | SNP            | Splice region variant (38%)            |
|       |      |                | 30% | chr17 | 7579472   | G  | C  | 90%  | 301% | 26884.2 | 1793 | 1621 | ---        | TP53   | 72   | SNP            | Missense (P/R) - Tolerated             |
|       |      |                | 30% | chr18 | 48586344  | C  | T  | 50%  | 167% | 10232   | 4919 | 1005 | ---        | SMAD4  | ?    | SNP            | Intronic variant (5%)                  |
| PF290 | 110% | Jubular Adenon | 40% | chr1  | 115258748 | C  | A  | 10%  | 25%  | 998.62  | 5159 | 196  | ---        | NRAS   | 12   | missense       | p.G12C                                 |
|       |      |                | 40% | chr1  | 115258748 | C  | A  | 10%  | 25%  | 955.36  | 5188 | 198  | COSM562    | NRAS   | 12   | Missense       | p.G12C                                 |
|       |      |                | 40% | chr3  | 178917005 | A  | G  | 49%  | 122% | 6115.33 | 1265 | 615  | ---        | PIK3CA | ?    | SNP            | Downstream gene variant (22%)          |
|       |      |                | 40% | chr4  | 1807894   | G  | A  | 100% | 250% | 20747.1 | 1300 | 1304 | ---        | FGFR3  | 651  | SNP            | Synonymous variant (4%)                |
|       |      |                | 40% | chr4  | 55141055  | A  | G  | 100% | 250% | 29312.1 | 1590 | 1616 | ---        | PDGFRA | 567  | SNP            | Synonymous variant (4%)                |
|       |      |                | 40% | chr4  | 55152040  | C  | T  | 47%  | 118% | 11273.7 | 3237 | 941  | COSM22413  | PDGFRA | 824  | Silent         | p.V824V                                |
|       |      |                | 40% | chr4  | 55593464  | A  | C  | 51%  | 128% | 12745.9 | 5401 | 1021 | COSM28026  | KIT    | 541  | Missense       | p.M541L                                |
|       |      |                | 40% | chr4  | 55962546  | -  | G  | 37%  | 93%  | 3825.86 | 3672 | 722  | ---        | KDR    | ?    | Insertion      | Noncoding region, unknown              |
|       |      |                | 40% | chr4  | 55972974  | T  | A  | 52%  | 130% | 10809.3 | 3237 | 1039 | ---        | KDR    | 472  | Missense       | Missense (Q>H) - Tolerated             |

|       |      |                          |     |       |           |         |    |      |      |         |      |      |            |         |         |                       |                                                        |
|-------|------|--------------------------|-----|-------|-----------|---------|----|------|------|---------|------|------|------------|---------|---------|-----------------------|--------------------------------------------------------|
|       |      |                          | 40% | chr4  | 55980239  | C       | T  | 100% | 250% | 15031   | 959  | 951  | ---        | KDR     | ?       | SNP                   | Intronic variant (48%)                                 |
|       |      |                          | 40% | chr5  | 112175767 | CGGAAAC | -  | 39%  | 98%  | 10038.9 | 3764 | 762  | ---        | APC     | 1492    | Deletion              | ATES?/A deletes a T,E,S at codons 1492, 1493, 1494 ?   |
|       |      |                          | 40% | chr5  | 149433596 | TG      | GA | 100% | 250% | 12540.3 | 781  | 782  | ---        | CSF1R   | ?       | SNP                   | Downstream gene variant                                |
|       |      |                          | 40% | chr7  | 55249063  | G       | A  | 49%  | 121% | 4528.13 | 927  | 454  | ---        | EGFR    | ?       | SNP                   | Intronic variant (42%)                                 |
|       |      |                          | 40% | chr10 | 43613843  | G       | T  | 100% | 250% | 32033.8 | 2266 | 1997 | ---        | RET     | 769     | SNP                   | Synonymous variant (28%)                               |
|       |      |                          | 40% | chr11 | 534242    | A       | G  | 45%  | 113% | 8555.8  | 1611 | 734  | COSM249860 | HRAS    | 27      | Silent                | p.H27H                                                 |
|       |      |                          | 40% | chr17 | 7579472   | G       | C  | 93%  | 232% | 23579.6 | 1497 | 1383 | ---        | TP53    | 72      | Missense              | Missense (P/R) - Tolerated                             |
|       |      |                          | 40% | chr22 | 24176287  | G       | A  | 50%  | 124% | 9693.33 | 1581 | 789  | COSM1090   | SMARCB1 | ?       | Intronic Substitution |                                                        |
| PF293 | 28%  | Hyperplastic             | 50% | chr2  | 212812106 | C       | T  | 9%   | 18%  | 40.96   | 137  | 12   | ---        | ERBB4   |         | SNP                   | intronic variant                                       |
|       |      |                          | 50% | chr3  | 178917005 | A       | G  | 39%  | 77%  | 335.53  | 101  | 39   | ---        | PIK3CA  | ?       | SNP                   | Downstream gene variant (22%)                          |
|       |      |                          | 50% | chr4  | 1807894   | G       | A  | 100% | 200% | 27254.7 | 1706 | 1706 | ---        | FGFR3   | 651     | SNP                   | Synonymous variant (4%)                                |
|       |      |                          | 50% | chr4  | 55141055  | A       | G  | 100% | 200% | 3027.02 | 166  | 170  | ---        | PDGFRA  | 567     | SNP                   | Synonymous variant (4%)                                |
|       |      |                          | 50% | chr4  | 55152040  | C       | T  | 38%  | 77%  | 3275.83 | 802  | 307  | COSM22413  | PDGFRA  | 824     | Silent                | p.V824V                                                |
|       |      |                          | 50% | chr4  | 55593464  | A       | C  | 43%  | 85%  | 9189.63 | 1895 | 810  | COSM28026  | KIT     | 541     | Missense              | p.M541L                                                |
|       |      |                          | 50% | chr4  | 55962546  | -       | G  | 51%  | 102% | 6397.37 | 2615 | 916  | ---        | KDR     | ?       | Insertion             | Noncoding region, unknown                              |
|       |      |                          | 50% | chr4  | 55972974  | T       | A  | 48%  | 97%  | 1195.18 | 242  | 119  | ---        | KDR     | 472     | Missense              | Missense (Q>H) - Tolerated                             |
|       |      |                          | 50% | chr4  | 55980239  | C       | T  | 100% | 200% | 1752.52 | 115  | 115  | ---        | KDR     | ?       | SNP                   | Intronic variant (48%)                                 |
|       |      |                          | 50% | chr5  | 112175398 | C       | T  | 5%   | 10%  | 35.7    | 222  | 11   | ---        | APC     | 1369    | Silent                | p.P1369P                                               |
|       |      |                          | 50% | chr5  | 112175409 | C       | T  | 5%   | 10%  | 34.35   | 231  | 11   | ---        | APC     | 1373    | Missense              | p.P1373L                                               |
|       |      |                          | 50% | chr5  | 112175770 | G       | A  | 41%  | 82%  | 1291.8  | 278  | 115  | ---        | APC     | 1493    | SNP                   | Synonymous variant                                     |
|       |      |                          | 50% | chr5  | 112175963 | G       | A  | 6%   | 12%  | 36.01   | 273  | 17   | ---        | APC     | 1558    | Missense              | p.D1558N                                               |
|       |      |                          | 50% | chr5  | 149433596 | TG      | GA | 94%  | 187% | 2733.41 | 202  | 189  | ---        | CSF1R   | ?       | SNP                   | Downstream gene variant                                |
|       |      |                          | 50% | chr7  | 55249063  | G       | A  | 31%  | 61%  | 228.64  | 95   | 29   | ---        | EGFR    | ?       | SNP                   | Intronic variant (42%)                                 |
|       |      |                          | 50% | chr7  | 128851599 | G       | A  | 5%   | 9%   | 42.15   | 875  | 41   | ---        | SMO     | 462     | Missense?             | p.V462M or intronic variant?                           |
|       |      |                          | 50% | chr7  | 140453136 | A       | T  | 22%  | 45%  | 383     | 219  | 49   | COSM476    | BRAF    | 600     | Missense              | p.V600E                                                |
|       |      |                          | 50% | chr9  | 21971136  | G       | A  | 6%   | 12%  | 52.83   | 255  | 15   | ---        | CDKN2A  | 74      | Silent                | p.D74D                                                 |
|       |      |                          | 50% | chr9  | 21971136  | G       | A  | 6%   | 12%  | 53.12   | 257  | 15   | COSM12739  | CDKN2A  | 74      | Silent                | p.D74D                                                 |
|       |      |                          | 50% | chr9  | 139390805 | G       | A  | 11%  | 23%  | 109.2   | 245  | 28   | ---        | NOTCH1  | 2462    | silent                | p.P2462P                                               |
|       |      |                          | 50% | chr10 | 43613843  | G       | T  | 98%  | 196% | 21607.1 | 1419 | 1389 | ---        | RET     | 769     | SNP                   | Synonymous variant (28%)                               |
|       |      |                          | 50% | chr10 | 43615661  | C       | T  | 16%  | 32%  | 63.41   | 76   | 12   | ---        | RET     |         |                       | intronic variant                                       |
|       |      |                          | 50% | chr11 | 534242    | A       | G  | 54%  | 108% | 13847.1 | 2863 | 1081 | COSM249860 | HRAS    | 27      | Silent                | p.H27H                                                 |
|       |      |                          | 50% | chr12 | 25398207  | C       | T  | 5%   | 9%   | 50.35   | 1114 | 52   | ---        | KRAS    |         |                       | splice donor variant - predicted to have high impact   |
|       |      |                          | 50% | chr13 | 28602308  | G       | A  | 5%   | 10%  | 31.23   | 433  | 22   | ---        | FLT3    |         |                       | intronic variant                                       |
|       |      |                          | 50% | chr13 | 28602369  | G       | -  | 97%  | 194% | 6677.12 | 430  | 418  | ---        | FLT3    | 667     | frameshift deletion   | p.Q667?                                                |
|       |      |                          | 50% | chr14 | 105246554 | C       | T  | 5%   | 10%  | 74.87   | 605  | 29   | ---        | AKT1    |         |                       | splice acceptor variant, predicted to have high impact |
|       |      |                          | 50% | chr17 | 7578368   | C       | T  | 5%   | 9%   | 153.23  | 1449 | 71   | ---        | TP53    |         |                       | intronic variant                                       |
|       |      |                          | 50% | chr17 | 7579472   | G       | C  | 100% | 200% | 1047.75 | 62   | 62   | ---        | TP53    | 72      | Missense              | Missense (P/R) - Tolerated                             |
|       |      |                          | 50% | chr19 | 1220357   | G       | A  | 8%   | 15%  | 51.26   | 248  | 19   | ---        | STK11   |         |                       | intronic variant                                       |
|       |      |                          | 50% | chr19 | 1220400   | G       | A  | 6%   | 13%  | 33.22   | 239  | 15   | ---        | STK11   | 107/165 | Missense              | E>K, exact codon unknown                               |
|       |      |                          | 50% | chr19 | 1223111   | G       | A  | 6%   | 12%  | 42.75   | 409  | 24   | ---        | STK11   |         | SNP                   | downstream gene variant                                |
|       |      |                          | 50% | chr22 | 24176287  | G       | A  | 38%  | 77%  | 588.68  | 149  | 57   | COSM1090   | SMARCB1 | ?       | Intronic Substitution | p.?                                                    |
| PF295 | -48% | Sessile Serrated Adenoma | 30% | chr4  | 1807894   | G       | A  | 100% | 333% | 11885.5 | 740  | 742  | ---        | FGFR3   | 651     | SNP                   | Synonymous variant (4%)                                |
|       |      |                          | 30% | chr4  | 55141055  | A       | G  | 100% | 333% | 17045.3 | 933  | 938  | ---        | PDGFRA  | 567     | SNP                   | Synonymous variant (4%)                                |
|       |      |                          | 30% | chr4  | 55593464  | A       | C  | 50%  | 165% | 12154.6 | 2166 | 990  | COSM28026  | KIT     | 541     | Missense              | p.M541L Tolerated                                      |
|       |      |                          | 30% | chr4  | 55946354  | G       | T  | 52%  | 173% | 10313.8 | 1917 | 997  | ---        | KDR     | ?       | SNP                   | Intronic variant                                       |
|       |      |                          | 30% | chr4  | 55980239  | C       | T  | 100% | 333% | 8654.61 | 549  | 549  | ---        | KDR     | ?       | SNP                   | Intronic variant (48%)                                 |
|       |      |                          | 30% | chr5  | 112175770 | G       | A  | 100% | 333% | 36339.1 | 2081 | 1994 | ---        | APC     | 1493    | SNP                   | Synonymous                                             |
|       |      |                          | 30% | chr5  | 149433596 | TG      | GA | 100% | 333% | 6289.21 | 402  | 401  | ---        | CSF1R   | ?       | SNP                   | Downstream gene variant                                |
|       |      |                          | 30% | chr7  | 55221882  | C       | T  | 49%  | 163% | 6566.54 | 1335 | 655  | ---        | EGFR    |         |                       | intronic variant                                       |
|       |      |                          | 30% | chr7  | 55249063  | G       | A  | 51%  | 168% | 2884.56 | 564  | 285  | ---        | EGFR    | ?       | SNP                   | Intronic variant (42%)                                 |
|       |      |                          | 30% | chr7  | 140453136 | A       | T  | 17%  | 56%  | 1111.05 | 955  | 161  | COSM476    | BRAF    | 600     | Missense              | p.V600E                                                |
|       |      |                          | 30% | chr10 | 43613843  | G       | T  | 100% | 333% | 20455.5 | 1273 | 1279 | ---        | RET     | 769     | SNP                   | Synonymous variant (28%)                               |
|       |      |                          | 30% | chr11 | 534242    | A       | G  | 49%  | 164% | 4751.91 | 800  | 395  | COSM249860 | HRAS    | 27      | Silent                | p.H27H                                                 |
|       |      |                          | 30% | chr13 | 28602292  | T       | C  | 48%  | 160% | 9507.84 | 2144 | 958  | ---        | FLT3    | ?       | SNP                   | Intronic variant (4%)                                  |
|       |      |                          | 30% | chr13 | 28610183  | A       | G  | 100% | 333% | 31794.4 | 2410 | 1992 | ---        | FLT3    | ?       | SNP                   | Splice region variant (38%)                            |
|       |      |                          | 30% | chr17 | 7579472   | G       | C  | 52%  | 174% | 5757.22 | 697  | 448  | ---        | TP53    | 72      | Missense              | Missense (P/R) - Tolerated                             |
| PF296 | -43% | Hyperplastic             | 35% | chr2  | 209113154 | G       | A  | 7%   | 21%  | 288.65  | 2916 | 145  | ---        | IDH1    | 118     | Missense              | p.P118L, conflicting predicted results                 |



|                                                                                                                                                                                                                                                                                                                |                                  |                          |  |     |       |           |    |    |      |      |         |      |      |            |         |      |                           |                                     |
|----------------------------------------------------------------------------------------------------------------------------------------------------------------------------------------------------------------------------------------------------------------------------------------------------------------|----------------------------------|--------------------------|--|-----|-------|-----------|----|----|------|------|---------|------|------|------------|---------|------|---------------------------|-------------------------------------|
|                                                                                                                                                                                                                                                                                                                |                                  |                          |  | 35% | chr4  | 1807894   | G  | A  | 100% | 286% | 31970.5 | 3095 | 1996 | ---        | FGFR3   | 651  | SNP                       | Synonymous variant (4%)             |
|                                                                                                                                                                                                                                                                                                                |                                  |                          |  | 35% | chr4  | 55141055  | A  | G  | 100% | 286% | 15902.5 | 879  | 885  | ---        | PDGFRA  | 567  | SNP                       | Synonymous variant (4%)             |
|                                                                                                                                                                                                                                                                                                                |                                  |                          |  | 35% | chr4  | 55561713  | T  | C  | 5%   | 14%  | 91.24   | 1847 | 91   | ---        | KIT     | 35   | Missense                  | p.S35P, predicted to be deleterious |
|                                                                                                                                                                                                                                                                                                                |                                  |                          |  | 35% | chr4  | 55593464  | A  | C  | 52%  | 150% | 13213.4 | 6914 | 1047 | COSM28026  | KIT     | 541  | Missense                  | p.M541L                             |
|                                                                                                                                                                                                                                                                                                                |                                  |                          |  | 35% | chr4  | 55946354  | G  | T  | 49%  | 141% | 7393.52 | 1488 | 734  | ---        | KDR     | ?    | SNP                       | Intronic variant                    |
|                                                                                                                                                                                                                                                                                                                |                                  |                          |  | 35% | chr4  | 55980239  | C  | T  | 98%  | 279% | 5258.78 | 353  | 345  | ---        | KDR     | ?    | SNP                       | Intronic variant (48%)              |
|                                                                                                                                                                                                                                                                                                                |                                  |                          |  | 35% | chr5  | 112175589 | C  | T  | 5%   | 13%  | 31.02   | 604  | 28   | ---        | APC     | 1433 | Missense                  | Missense (P>L) Deleterious          |
|                                                                                                                                                                                                                                                                                                                |                                  |                          |  | 35% | chr5  | 112175770 | G  | A  | 99%  | 283% | 15113.1 | 845  | 845  | ---        | APC     | 1439 | SNP                       | Synonymous variant                  |
|                                                                                                                                                                                                                                                                                                                |                                  |                          |  | 35% | chr5  | 149433596 | TG | GA | 97%  | 278% | 11052.9 | 732  | 713  | ---        | CSF1R   | ?    | SNP                       | Downstream gene variant             |
|                                                                                                                                                                                                                                                                                                                |                                  |                          |  | 35% | chr7  | 55221882  | C  | T  | 41%  | 116% | 5630.79 | 1535 | 625  | ---        | EGFR    | ?    | SNP                       | intronic variant                    |
|                                                                                                                                                                                                                                                                                                                |                                  |                          |  | 35% | chr7  | 55249063  | G  | A  | 52%  | 147% | 2647.95 | 503  | 260  | ---        | EGFR    | ?    | SNP                       | Intronic variant (42%)              |
|                                                                                                                                                                                                                                                                                                                |                                  |                          |  | 35% | chr7  | 140453136 | A  | T  | 19%  | 55%  | 1271.91 | 878  | 169  | COSM476    | BRAF    | 600  | Missense                  | p.V600E                             |
|                                                                                                                                                                                                                                                                                                                |                                  |                          |  | 35% | chr10 | 43613843  | G  | T  | 100% | 286% | 32065.6 | 3848 | 1999 | ---        | RET     | 769  | SNP                       | Synonymous variant (28%)            |
|                                                                                                                                                                                                                                                                                                                |                                  |                          |  | 35% | chr11 | 534242    | A  | G  | 55%  | 156% | 14059.7 | 4747 | 1092 | COSM249860 | HRAS    | 27   | Silent                    | p.H27H                              |
|                                                                                                                                                                                                                                                                                                                |                                  |                          |  | 35% | chr11 | 108236261 | A  | C  | 5%   | 13%  | 71.65   | 1948 | 88   | ---        | ATM     | ?    | SNP                       | 3' UTR variant                      |
|                                                                                                                                                                                                                                                                                                                |                                  |                          |  | 35% | chr13 | 28602292  | T  | C  | 50%  | 142% | 10065.7 | 6272 | 993  | ---        | FLT3    | ?    | SNP                       | Intronic variant (4%)               |
|                                                                                                                                                                                                                                                                                                                |                                  |                          |  | 35% | chr13 | 28610183  | A  | G  | 100% | 286% | 31986.2 | 9446 | 1997 | ---        | FLT3    | ?    | SNP                       | Splice region variant (38%)         |
|                                                                                                                                                                                                                                                                                                                |                                  |                          |  | 35% | chr17 | 7579472   | G  | C  | 57%  | 163% | 1737.34 | 188  | 131  | ---        | TP53    | 72   | Missense                  | Missense (P/R) - Tolerated          |
|                                                                                                                                                                                                                                                                                                                |                                  |                          |  | 35% | chr22 | 24176287  | G  | A  | 5%   | 15%  | 60.32   | 385  | 20   | COSM1090   | SMARCB1 | ?    | Intronic Substitution p.? |                                     |
| PF297                                                                                                                                                                                                                                                                                                          | -30%                             | Sessile Serrated Adenoma |  | 25% | chr4  | 1807894   | G  | A  | 100% | 400% | 13422.2 | 851  | 850  | ---        | FGFR3   | 651  | SNP                       | Synonymous variant (4%)             |
|                                                                                                                                                                                                                                                                                                                |                                  |                          |  | 25% | chr4  | 55141055  | A  | G  | 100% | 400% | 21148.5 | 1170 | 1173 | ---        | PDGFRA  | 567  | SNP                       | Synonymous variant (4%)             |
|                                                                                                                                                                                                                                                                                                                |                                  |                          |  | 25% | chr4  | 55593464  | A  | C  | 51%  | 205% | 12768.8 | 2446 | 1024 | COSM28026  | KIT     | 541  | Missense                  | p.M541L                             |
|                                                                                                                                                                                                                                                                                                                |                                  |                          |  | 25% | chr4  | 55946354  | G  | T  | 48%  | 192% | 9452.92 | 2089 | 953  | ---        | KDR     | ?    | SNP                       | Intronic variant                    |
|                                                                                                                                                                                                                                                                                                                |                                  |                          |  | 25% | chr4  | 55980239  | C  | T  | 100% | 400% | 10203.4 | 646  | 644  | ---        | KDR     | ?    | SNP                       | Intronic variant (48%)              |
|                                                                                                                                                                                                                                                                                                                |                                  |                          |  | 25% | chr5  | 112175770 | G  | A  | 100% | 400% | 36289.1 | 2364 | 1990 | ---        | APC     | 1493 | SNP                       | Synonymous                          |
|                                                                                                                                                                                                                                                                                                                |                                  |                          |  | 25% | chr5  | 149433596 | TG | GA | 100% | 400% | 7744.54 | 493  | 492  | ---        | CSF1R   | ?    | SNP                       | Downstream gene variant             |
|                                                                                                                                                                                                                                                                                                                |                                  |                          |  | 25% | chr7  | 55221882  | C  | T  | 52%  | 207% | 8561.41 | 1596 | 826  | ---        | EGFR    | ?    | SNP                       | intronic variant                    |
|                                                                                                                                                                                                                                                                                                                |                                  |                          |  | 25% | chr7  | 55249063  | G  | A  | 46%  | 182% | 3149.9  | 721  | 329  | ---        | EGFR    | ?    | SNP                       | Intronic variant (42%)              |
|                                                                                                                                                                                                                                                                                                                |                                  |                          |  | 25% | chr7  | 140453136 | A  | T  | 17%  | 69%  | 1449.89 | 1212 | 208  | COSM476    | BRAF    | 600  | Missense                  | p.V600E                             |
|                                                                                                                                                                                                                                                                                                                |                                  |                          |  | 25% | chr10 | 43613843  | G  | T  | 100% | 400% | 23157   | 1449 | 1452 | ---        | RET     | 769  | SNP                       | Synonymous variant (28%)            |
|                                                                                                                                                                                                                                                                                                                |                                  |                          |  | 25% | chr11 | 534242    | A  | G  | 50%  | 202% | 6839.78 | 1090 | 552  | COSM249860 | HRAS    | 27   | Silent                    | p.H27H                              |
|                                                                                                                                                                                                                                                                                                                |                                  |                          |  | 25% | chr13 | 28602292  | T  | C  | 46%  | 182% | 8761.53 | 2449 | 909  | ---        | FLT3    | ?    | SNP                       | Intronic variant (4%)               |
|                                                                                                                                                                                                                                                                                                                |                                  |                          |  | 25% | chr13 | 28610183  | A  | G  | 100% | 400% | 31963.7 | 2770 | 1997 | ---        | FLT3    | ?    | SNP                       | Splice region variant (38%)         |
|                                                                                                                                                                                                                                                                                                                |                                  |                          |  | 25% | chr17 | 7579472   | G  | C  | 53%  | 212% | 7742.51 | 908  | 602  | ---        | TP53    | 72   | Missense                  | Missense (P/R) - Tolerated          |
| PF298                                                                                                                                                                                                                                                                                                          | -21%                             | Hyperplastic             |  | 45% | chr4  | 1807894   | G  | A  | 100% | 222% | 14177.6 | 886  | 886  | ---        | FGFR3   | 651  | SNP                       | Synonymous variant (4%)             |
|                                                                                                                                                                                                                                                                                                                |                                  |                          |  | 45% | chr4  | 55141055  | A  | G  | 100% | 222% | 23918.8 | 1308 | 1321 | ---        | PDGFRA  | 567  | SNP                       | Synonymous variant (4%)             |
|                                                                                                                                                                                                                                                                                                                |                                  |                          |  | 45% | chr4  | 55593464  | A  | C  | 50%  | 111% | 12229.5 | 3066 | 995  | COSM28026  | KIT     | 541  | Missense                  | p.M541L                             |
|                                                                                                                                                                                                                                                                                                                |                                  |                          |  | 45% | chr4  | 55946354  | G  | T  | 49%  | 110% | 9959.21 | 3460 | 987  | ---        | KDR     | ?    | SNP                       | Intronic variant                    |
|                                                                                                                                                                                                                                                                                                                |                                  |                          |  | 45% | chr4  | 55980239  | C  | T  | 100% | 222% | 11956.8 | 754  | 755  | ---        | KDR     | ?    | SNP                       | Intronic variant (48%)              |
|                                                                                                                                                                                                                                                                                                                |                                  |                          |  | 45% | chr5  | 112175770 | G  | A  | 100% | 222% | 36289.2 | 2952 | 1989 | ---        | APC     | 1493 | SNP                       | Synonymous                          |
|                                                                                                                                                                                                                                                                                                                |                                  |                          |  | 45% | chr5  | 149433596 | TG | GA | 100% | 222% | 7274.77 | 460  | 460  | ---        | CSF1R   | ?    | SNP                       | Downstream gene variant             |
|                                                                                                                                                                                                                                                                                                                |                                  |                          |  | 45% | chr7  | 55221882  | C  | T  | 51%  | 112% | 10132.7 | 1966 | 995  | ---        | EGFR    | ?    | SNP                       | intronic variant                    |
|                                                                                                                                                                                                                                                                                                                |                                  |                          |  | 45% | chr7  | 55249063  | G  | A  | 52%  | 114% | 4050.13 | 765  | 396  | ---        | EGFR    | ?    | SNP                       | Intronic variant (42%)              |
|                                                                                                                                                                                                                                                                                                                |                                  |                          |  | 45% | chr7  | 140453136 | A  | T  | 22%  | 48%  | 2557.3  | 1473 | 318  | COSM476    | BRAF    | 600  | Missense                  | p.V600E                             |
|                                                                                                                                                                                                                                                                                                                |                                  |                          |  | 45% | chr10 | 43613843  | G  | T  | 100% | 222% | 22619.7 | 1414 | 1418 | ---        | RET     | 769  | SNP                       | Synonymous variant (28%)            |
|                                                                                                                                                                                                                                                                                                                |                                  |                          |  | 45% | chr11 | 534242    | A  | G  | 52%  | 116% | 6212.49 | 940  | 497  | COSM249860 | HRAS    | 27   | Silent                    | p.H27H                              |
|                                                                                                                                                                                                                                                                                                                |                                  |                          |  | 45% | chr13 | 28602292  | T  | C  | 54%  | 120% | 11389.8 | 3206 | 1075 | ---        | FLT3    | ?    | SNP                       | Intronic variant (4%)               |
|                                                                                                                                                                                                                                                                                                                |                                  |                          |  | 45% | chr13 | 28610183  | A  | G  | 100% | 222% | 31963.7 | 3819 | 1997 | ---        | FLT3    | ?    | SNP                       | Splice region variant (38%)         |
|                                                                                                                                                                                                                                                                                                                |                                  |                          |  | 45% | chr17 | 7579472   | G  | C  | 56%  | 123% | 8742.46 | 991  | 668  | ---        | TP53    | 72   | Missense                  | Missense (P/R) - Tolerated          |
| 279                                                                                                                                                                                                                                                                                                            | Excluded due to insufficient DNA |                          |  |     |       |           |    |    |      |      |         |      |      |            |         |      |                           |                                     |
| 263                                                                                                                                                                                                                                                                                                            | Excluded due to insufficient DNA |                          |  |     |       |           |    |    |      |      |         |      |      |            |         |      |                           |                                     |
| 269                                                                                                                                                                                                                                                                                                            | Excluded due to insufficient DNA |                          |  |     |       |           |    |    |      |      |         |      |      |            |         |      |                           |                                     |
| 272                                                                                                                                                                                                                                                                                                            | Excluded due to insufficient DNA |                          |  |     |       |           |    |    |      |      |         |      |      |            |         |      |                           |                                     |
| 291                                                                                                                                                                                                                                                                                                            | Excluded due to insufficient DNA |                          |  |     |       |           |    |    |      |      |         |      |      |            |         |      |                           |                                     |
| 292                                                                                                                                                                                                                                                                                                            | Excluded due to insufficient DNA |                          |  |     |       |           |    |    |      |      |         |      |      |            |         |      |                           |                                     |
| <b>All variants post quality control processing.</b> Variants were eliminated based on the following: (1) quality score less than 10, (2) allelic frequency less than 5% or number of allele reads less than 10, (3) a known mispriming event for this panel (PMID:25017478), or (4) strand bias was recorded. |                                  |                          |  |     |       |           |    |    |      |      |         |      |      |            |         |      |                           |                                     |
