# Supplementary material
Source: PubMed Central journal article supplement (PMC5749341)
Supplement: gutjnl-2016-312232supp005.pdf [file gutjnl-2016-312232supp005.pdf]

Supplementary File S4\_tumor.h

```

#ifndef __TUMOR_H
#define __TUMOR_H

#include <iostream>
#include <vector>
#include <random>
#include <string>

using namespace std;

class Location
{
private:
    int x, y, z;
public:
    Location() {}
    Location(vector<int> v)
    {
        x = v[0]; y = v[1]; z = v[2];
    }
    Location(int xx, int yy, int zz)
    {
        x = xx; y=yy; z=zz;
    }
    int getX() const { return x; }
    int getY() const { return y; }
    int getZ() const { return z; }
    void print(ostream&) const;

    Location& operator=(const Location& b)
    {
        x = b.getX();
        y = b.getY();
        z = b.getZ();
        return *this;
    }

    Location& operator+=(const Location& b)
    {
        x += b.getX();
        y += b.getY();
        z += b.getZ();
        return *this;
    }

    Location& operator--=(const Location& b)
    {
        x -= b.getX();
        y -= b.getY();
        z -= b.getZ();
        return *this;
    }

    const Location operator+(const Location& b) const
    {
        return Location(*this) += b;
    }

    bool operator==(const Location& b) const
    {
        if ( (x == b.getX()) && (y == b.getY()) && (z == b.getZ()) )
            return true;
        return false;
    }
}

```

Supplementary File S4\_tumor.h

```

}

bool operator!=(const Location& b) const
{
    return !(*this == b);
}

bool operator<(const Location& b) const
{
    if ( x < b.getX() )
        return true;
    else if ( x > b.getX() )
        return false;
    else if ( y < b.getY() )
        return true;
    else if ( y > b.getY() )
        return false;
    else if ( z < b.getZ() )
        return true;
    else
        return false;
}

bool operator>(const Location& b) const
{
    return ( b < *this );
}

bool operator<=(const Location& b) const
{
    return !( b > *this );
}

bool operator>=(const Location& b) const
{
    return !( b < *this );
}
};

class Mutation
{
private:
    int id;
    int tumorSize;
    int numTumorCrypts;
    int numSliceCrypts;
    double fitnessChange;
public:
    Mutation() {}
    Mutation(int i, int ts, double fc)
    {
        id = i;
        tumorSize = ts;
        numTumorCrypts = 0;
        numSliceCrypts = 0;
        fitnessChange = fc;
    }
    void addTumorCrypt() { ++numTumorCrypts; }
    void subtractTumorCrypt() { --numTumorCrypts; }
    void addSliceCrypt() { ++numSliceCrypts; }
    void print(ostream&);
    int getID() { return id; }
    int getNumTumorCrypts() { return numTumorCrypts; }
}

```

Supplementary File S4\_tumor.h

```

int getNumSliceCrypts() { return numSliceCrypts; }
int getTumorSize() { return tumorSize; }
double getFitnessChange() { return fitnessChange; }
};

class Crypt
{
private:
    const int index;
    Location location;
    double fitness;
    double deathProbability;
    vector<Mutation*> mutations;
public:
    Crypt(int i, Location p, double f, vector<Mutation*> m) : index(i)
    {
        location = p;
        fitness = f;
        mutations = m;
        setDeathProbability();
    }
    ~Crypt() {}
    double getDeathProbability() { return deathProbability; }
    void setDeathProbability()
    {
        deathProbability = 0.2 / fitness;
        if ( deathProbability < 0 )
            deathProbability = 1;
        if ( deathProbability > 1 )
            deathProbability = 1;
    }
    int getIndex() const { return index; }
    Location getLocation() const { return location; }
    void setLocation(Location p) { location = p; }
    double getFitness() const { return fitness; }
    void setFitness(double f) { fitness = f; }
    vector<Mutation*> getMutations() const { return mutations; }
    void addMutation(Mutation* m) { mutations.push_back(m); }
    int getX() const { return location.getX(); }
    int getY() const { return location.getY(); }
    int getZ() const { return location.getZ(); }
    bool operator<(const Crypt& b) const
    {
        return ( location < b.getLocation() );
    }
    void print(ostream&);
};

class Tumor
{
private:
    vector<Crypt*> crypts;
    vector<Mutation*> mutations;
    map<Location, Crypt*> cryptMap;
    int nextCryptIndex;
    double expectedMutations;
    double fitnessMean;
    double fitnessSD;
    int sliceSize;
public:
    Tumor(double em, double fm, double fsd)
    {

```

Supplementary File S4\_tumor.h

```

nextCryptIndex = 0;
Location loc(0, 0, 0);
vector<Mutation*> m;
crypts.push_back(new Crypt(nextCryptIndex++, loc, 1.0, m) );
cryptMap[loc] = *(crypts.begin());
expectedMutations = em;
fitnessMean = fm;
fitnessSD = fsd;
sliceSize = 0;
}
void print(ostream&);
void change(mt19937_64&);
void addCrypt(mt19937_64&, Crypt*);
void deleteCrypt(int);
Location randomDirection(mt19937_64&);
int size() { return crypts.size(); }
int numMutations() { return mutations.size(); }
vector<Mutation*> getMutations() { return mutations; }
map<Location, Crypt*> getCryptMap() { return cryptMap; }
vector<Crypt*> getCrypts() { return crypts; }

//SLICE
void slice() {
    for (vector<Crypt*>::iterator c = crypts.begin(); c != crypts.end(); ++c) {
        Location test = (*c)->getLocation();
        if (test.getX() == 0) {
            sliceSize++;
            vector<Mutation*> copyOfMutations = (*c)->getMutations();
            for (vector<Mutation*>::iterator m = copyOfMutations.begin(); m !=
copyOfMutations.end(); ++m)
                (*m)->addSliceCrypt();
        }
    }
}
int getSliceSize() { return sliceSize; }

};

#endif

```
