# Supplementary material
Source: PubMed Central journal article supplement (PMC5749341)
Supplement: gutjnl-2016-312232supp006.pdf [file gutjnl-2016-312232supp006.pdf]

Supplementary File S5\_tumor.C

```
// 3D Tumor Generation
// Authors: Luli S. Zou, Bret R. Larget
// Used in Sievers et. al. 2016
// View README before compiling/using

#include <iostream>
#include <iomanip>
#include <vector>
#include <random>
#include <string>
#include <sstream>
#include <list>
#include <map>
#include <fstream>

#include "tumor.h"

using namespace std;

void Location::print(ostream& f) const
{
    f << '(' << getX() << ',' << getY() << ',' << getZ() << ')';
}

void Crypt::print(ostream& f)
{
    f << index << ": ";
    f << "location = (" << getX() << ',' << getY() << ',' << getZ() << "), ";
    f << "fitness = " << setprecision(6) << fitness << ", ";
    f << "mutations = (";
    for ( vector<Mutation*>::iterator p=mutations.begin(); p!=mutations.end(); ++p )
    {
        if ( p != mutations.begin() )
            f << ',';
        f << *p;
    }
    f << ')';
}

void Mutation::print(ostream& f)
{
    f << id << ": ";
    f << "tumor size at creation = " << tumorSize << ", ";
    f << "# crypts = " << numTumorCrypts << endl;
}

void Tumor::print(ostream& f)
{
    //f << "Crypts:" << endl;
    //for ( vector<Crypt*>::iterator p=crypts.begin(); p!=crypts.end(); ++p )
    //{
    //    (*p)->print(f);
    //}
    //f << endl;
    f << "Mutations:" << endl;
    for ( vector<Mutation*>::iterator p=mutations.begin(); p!=mutations.end(); ++p )
    {
        (*p)->print(f);
    }
    f << endl;
    //f << "Map:" << endl;
    //for ( map<Location, Crypt*>::iterator p=cryptMap.begin(); p!=cryptMap.end(); ++p )
}
```

Supplementary File S5\_tumor.C

```

//{
// p->first.print(f);
// f << " --> " << (p->second->getIndex() << endl;
//}
//f << endl;
}

Location Tumor::randomDirection(mt19937_64& rng)
{
vector<int> v(3, 0);
uniform_int_distribution<> rint(0, 17);
int x=rint(rng);
switch (x)
{
case 0 : v[0] -= 1; break;
case 1 : v[0] += 1; break;
case 2 : v[1] -= 1; break;
case 3 : v[1] += 1; break;
case 4 : v[2] -= 1; break;
case 5 : v[2] += 1; break;
case 6 : v[0] -= 1; v[1] -= 1; break;
case 7 : v[0] -= 1; v[1] += 1; break;
case 8 : v[0] += 1; v[1] -= 1; break;
case 9 : v[0] += 1; v[1] += 1; break;
case 10 : v[0] -= 1; v[2] -= 1; break;
case 11 : v[0] -= 1; v[2] += 1; break;
case 12 : v[0] += 1; v[2] -= 1; break;
case 13 : v[0] += 1; v[2] += 1; break;
case 14 : v[1] -= 1; v[2] -= 1; break;
case 15 : v[1] -= 1; v[2] += 1; break;
case 16 : v[1] += 1; v[2] -= 1; break;
case 17 : v[1] += 1; v[2] += 1; break;
}
return Location(v);
}

void Tumor::change(mt19937_64& rng)
{
// pick a random crypt
int x=0;
int n=crypts.size();
if ( n > 1 )
{
uniform_int_distribution<> rint(0, n-1);
x = rint(rng);
}
Crypt* parent = crypts[x];
// decide to either kill crypt or initiate crypt fission
uniform_real_distribution<double> runif(0.0, 1.0);
if ( runif(rng) < parent->getDeathProbability() )
{
//Update number of crypts that carry the mutation
vector<Mutation* > parent_muts = parent->getMutations();
for (vector<Mutation* >::iterator m = parent_muts.begin(); m !=
parent_muts.end(); ++m)
(*m)->subtractTumorCrypt();
deleteCrypt(x);
}
else
{
addCrypt(rng, parent);
}
}
}

```

Supplementary File S5\_tumor.C

```

void Tumor::addCrypt(mt19937_64& rng, Crypt* parent)
{
    Location parentLocation = parent->getLocation();
    Location dir = randomDirection(rng);
    vector<Crypt*> displacedCrypts;
    Location newLocation = parentLocation;
    map<Location, Crypt*>::iterator mp;
    do
    {
        newLocation += dir;
        mp = cryptMap.find(newLocation);
        if ( mp != cryptMap.end() )
        {
            displacedCrypts.push_back(mp->second);
            mp->second->setLocation(newLocation + dir); // yes, the map is now wrong
        }
    } while ( mp != cryptMap.end() );
    // now we need to reverse_iterate over displacedCrypts to correct the map
    for ( vector<Crypt*>::reverse_iterator r=displacedCrypts.rbegin(); r !=
displacedCrypts.rend(); ++r )
    {
        cryptMap[( *r )->getLocation()] = *r;
    }
    // finally, create the new crypt and add it to the map
    newLocation = parentLocation + dir;

    //Possibility of mutations occurring
    vector<Mutation*> new_muts = parent->getMutations();
    double new_fitness = parent->getFitness();
    poisson_distribution<int> pd(expectedMutations);
    int numMuts = pd(rng);
    if (numMuts > 0) {
        normal_distribution<double> nd(fitnessMean, fitnessSD);
        double fitChange = nd(rng);
        new_fitness += fitChange;
        for (int i = 0; i < numMuts; i++) {
            Mutation* mut = new Mutation(mutations.size(), size(), fitChange);
            new_muts.push_back(mut);
            mutations.push_back(mut);
        }
    }
    //Update number of crypts that carry the mutation
    for (vector<Mutation*>::iterator m = new_muts.begin(); m != new_muts.end(); ++m)
        (*m)->addTumorCrypt();

    crypts.push_back( new Crypt(nextCryptIndex++, newLocation, new_fitness, new_muts) );
    cryptMap[newLocation] = crypts.back();
}

void Tumor::deleteCrypt(int k)
{
    // erase location from the map
    cryptMap.erase(crypts[k]->getLocation());
    // delete the actual crypt
    delete crypts[k];
    // overwrite deleted crypt pointer with last pointer
    crypts[k] = crypts.back();
    // eliminate end of the vector
    crypts.pop_back();
}

void usage(ostream& f)

```

Supplementary File S5\_tumor.C

```

{
    f << "Bad input" << endl;
    exit(1);
}

void setValue(string value, unsigned int &x)
{
    istringstream s(value);
    s >> x;
}

void setValue(string value, double &x)
{
    istringstream s(value);
    s >> x;
}

void processCommandLine(int argc,
                        char* argv[],
                        unsigned int &seed,
                        unsigned int &tumorSize,
                        unsigned int &numTumors,
                        double &expectedMutations,
                        double &fitnessMean,
                        double &fitnessSD,
                        bool &printTumor)
{
    if ( argc == 1 )
    {
        random_device rd;
        seed = rd();
    }
    else
    {
        int i = 1;
        while ( i < argc )
        {
            string key = argv[i++];

            if ( key=="-s" || key=="--seed" ) {
                if ( i==argc )
                    usage( cerr );
                setValue(argv[i++], seed);
            }
            else if ( key=="-t" || key=="--tumor-size" ) {
                if ( i==argc )
                    usage( cerr );
                setValue(argv[i++], tumorSize);
            }
            else if ( key=="-n" || key=="--number-tumors" ) {
                if ( i==argc )
                    usage( cerr );
                setValue(argv[i++], numTumors);
            }
            else if ( key=="-m" || key=="--expected-mutations" ) {
                if ( i==argc )
                    usage( cerr );
                setValue(argv[i++], expectedMutations);
            }
            else if ( key=="-fm" || key=="--fitness-mean" ) {
                if ( i==argc )
                    usage( cerr );
            }
        }
    }
}

```

Supplementary File S5\_tumor.C

```

    setValue(argv[i++], fitnessMean);
}
else if ( key == "-fsd" || key=="--fitness-SD") {
    if ( i==argc)
        usage( cerr );
    setValue(argv[i++], fitnessSD);
}
else if ( key=="-p" || key=="--print-tumor")
    printTumor = true;
else
    usage(cerr);
}
}
}

int main(int argc, char* argv[])
{
    // Process command line
    unsigned int seed;
    unsigned int tumorSize=0;
    unsigned int numTumors=200;
    double expectedMutations = 5e-4;
    double fitnessMean = 0;
    double fitnessSD = 0.2;
    bool printTumor = false;

processCommandLi ne(argc, argv, seed, tumorSi ze, numTumors, expectedMutati ons, fi tnessMean,
fitnessSD, pri ntTumor);

    int make = 0;
    while (make < numTumors) {
        // Initialize random number generator
        cout << "Seed set to " << seed+make << endl;
        mt19937_64 rng(seed+make);

        Tumor tumor(expectedMutations, fi tnessMean, fi tnessSD);

        while ( tumor. si ze() < tumorSi ze && tumor. si ze() > 0 )
        {
            tumor. change(rng);
            if ( tumor. si ze() % 10000 == 0 ) {
                cerr << "tumor si ze = " << tumor. si ze() << endl;
            }
        }
        if (printTumor) {
            tumor. print(cout);
        }
        tumor. slice(); //Slice the tumor
        ostream filename;
        filename << "mutation_data_" << seed+make << ".csv";
        string fn = filename. str();
        ofstream Mutati on_Data (fn);
        Mutati on_Data << "seed, ID, sl i ce_freq, tum_freq, tum_si ze, fi t_change" << endl;
        vector<Mutati on*> copyOfMutati ons = tumor. getMutati ons();
        //DATA PRINTING
        for (vector<Mutati on*>:: i terator m = copyOfMutati ons. begi n(); m !=
copyOfMutati ons. end(); ++m) {
            Mutati on_Data << seed+make << ", "
                << (*m)->getID() << ", "
                << doubl e((*m)->getNumSl i ceCrypts())/tumor. getSl i ceSi ze() << ", "
                << doubl e((*m)->getNumTumorCrypts())/tumor. si ze() << ", "
                << (*m)->getTumorSi ze() << ", "
                << (*m)->getFi tnessChange() << endl;
        }
    }
}

```

Supplementary File S5\_tumor.C

```
    }  
    make++;  
  }  
  return 0;  
}
```
